# Supplementary material for: Polymer-based chemical-nose systems for optical-pattern recognition of gut microbiota
Source: Chem Sci. 2022 Apr 26;13(20):5830–7. doi: 10.1039/d2sc00510g (PMC9132137; doi:10.1039/d2sc00510g)
Supplement: SC-013-D2SC00510G-s001 [file SC-013-D2SC00510G-s001.xlsx]

## Sheet: Dataset 1
	Dataset 1. Data-set matrix of the differences in fluorescence intensity before and after the addition of gut-derived bacteria (I–I0, OD600 = 0.04) generated from the chemical nose. The jackknife test afforded 99% accuracy.
			pH 7.0																								pH 5.0
	Analytes		-None		-hA		-Dap		-Gly3		-Pro		-Leu		-Nle		-Pyri		-Phe		-Suc		-Pht		-Pyr		-None		-hA		-Dap		-Gly3		-Pro		-Leu		-Nle		-Pyri		-Phe		-Suc		-Pht		-Pyr
	Phylum	Species	Ch1	Ch2	Ch1	Ch2	Ch1	Ch2	Ch1	Ch2	Ch1	Ch2	Ch1	Ch2	Ch1	Ch2	Ch1	Ch2	Ch1	Ch2	Ch1	Ch2	Ch1	Ch2	Ch1	Ch2	Ch1	Ch2	Ch1	Ch2	Ch1	Ch2	Ch1	Ch2	Ch1	Ch2	Ch1	Ch2	Ch1	Ch2	Ch1	Ch2	Ch1	Ch2	Ch1	Ch2	Ch1	Ch2	Ch1
	Firmicutes	F.A.	4171.4	1557.8	3935.8	1269.2	-13.4	-38	1464.2	501.2	782.2	250.6	350.6	134.4	295.8	48	2324.2	765.4	-1667.2	-620.6	324.8	135.2	-782.4	-246	1764	586	1582.6	555.2	2584.2	865.6	2037.6	441	1136.8	441	-1024.6	-381.8	408.6	158.4	1898.6	650.2	1270.8	417.8	2256.6	-169	-514.2	-169	1280.2	437.6	1077.8
	Firmicutes	F.A.	3304.6	1129.4	4118	1434.8	411.4	106.8	1413.6	494.6	760.6	254.2	378.2	150.6	340.4	72.8	2292.2	764.4	-2121.6	-701.4	338.8	133.6	-563	-187.6	1633.4	556.2	1526.6	539.8	2593.4	847.6	1905.6	435.6	1155.8	435.6	-1995.6	-617.4	382	144	1981.2	671.4	1219.4	416.2	2209.4	-102.2	-378.8	-102.2	1321	475	1030.4
	Firmicutes	F.A.	3182	1090	3850.4	1258.4	506.2	128.2	1427.4	481.8	697.4	244.8	359.2	145.6	277	65.6	2213	729.6	-1074.2	-374.2	325.6	117.2	-429.2	-164.6	1697.2	568.4	1494.8	539.4	2536.2	865	1822.6	396.6	1070.8	396.6	-1012.4	-344.4	369.2	135.8	1985.6	666.4	1163	407.4	2263.4	-128.8	-399.2	-128.8	1259.4	445.4	1076.6
	Firmicutes	F.A.	3166.2	1088.2	3774.4	1235.2	154.8	35	1267.2	417.6	748.8	241	348.8	148.6	185.6	78.8	2279.8	770.2	-1797.8	-518	334	122.6	-796	-278.6	1712.2	580.8	1447.6	516.6	2514.8	842.6	1818.2	429.6	1176.2	429.6	-1235.2	-386	408	156.6	2003.6	686.2	1279.8	434	2382.8	-175.8	-558.2	-175.8	1370.4	475.4	1202
	Firmicutes	F.A.	3054.2	1050.2	3588.6	1188.6	135.8	52.6	1292.8	429.2	663.2	242.2	328.8	141.4	399.2	111.8	2417.8	808.8	-1221.2	-406.4	323.6	135.8	-383.2	-133.8	1728.4	573.2	1403.6	500.8	2336.4	799.6	1845.4	388.8	1052.8	388.8	-1330.4	-448	385.6	162.6	1951.6	647.6	1193.8	406.2	2171.4	-126.8	-462.8	-126.8	1304.6	449.8	1092.8
	Firmicutes	F.A.	2986.8	1042.2	3526.6	1172.8	328	83.2	1259.8	424	718.6	249.6	321.8	122.2	239.6	59.6	2190.4	740.4	-946.4	-374.6	306.6	113.2	-362.4	-114.2	1726.6	542	1390.2	507	2365.4	794.4	1787.8	398.4	1077.4	398.4	-995.2	-358	434.8	162.4	1798.4	613.2	1165.6	404.8	2069	-149.6	-458.4	-149.6	1200.4	436.2	1057.8
	Firmicutes	F.A.	3201.2	1105.6	3842.8	1258	217.4	52.4	1379	462	721	263.4	350.6	140.4	189.4	44.4	2295.2	737.2	-1533.6	-551.4	321.4	130.2	-570.4	-200	1754	603.8	1484.4	540.6	2471.8	828	1851.4	406.8	1116.8	406.8	-982.2	-290.4	384.8	140.2	2112	719.6	1244	406.4	2387.2	-175.4	-559.8	-175.4	1346.6	453	1108
	Firmicutes	F.A.	3168.4	1096	3708.6	1230.2	46.2	-29	1434.8	470.8	710.4	247.8	346.6	122	262	69.6	2196.4	730.2	-1615.4	-586.8	249.8	77.6	-667.8	-260.4	1578	528.8	1487	519.8	2446.6	824.6	1792.4	381.4	1062.8	381.4	-862.8	-345.2	380.8	152.4	2048.4	675.8	1232	413.6	2125.8	-256.8	-807.2	-256.8	1193.4	400.6	968.6
	Firmicutes	F.A.	3129.4	1084.8	3612.2	1198	446.4	106.6	1321.2	457.4	720.2	240.6	335.2	135.6	345	67.8	2282.2	728.6	-1940.4	-639.8	285	103.8	-932.6	-340	1619	538.8	1462.6	527.6	2417.2	813	1810	394.8	1067.2	394.8	-713.6	-228.2	401.8	147.4	2091.2	682.6	1288.4	429.2	2257.8	-242	-591.2	-201.6	14.2	13.2	113.2
	Firmicutes	F.A.	3116.8	1082.6	3716	1233.8	252.6	75.6	1356.6	469.6	756.8	247	303.6	120.4	168	78.6	2345.4	775.8	-1674	-525.4	326.6	136.4	-683.8	-228.6	1738	595.2	1451	507.4	3004	1107.4	1782.2	384.6	1072.8	384.6	-653.6	-229.4	412.4	155.8	2081.8	697.2	1265.6	442	2232.2	-185.2	-602	-185.2	1326.6	485	1166.2
	Firmicutes	F.A.	3094.6	1096.8	3597.4	1193	469.6	126.8	1378.8	471.8	696.2	240.4	313	117	384.8	118	2283.2	745.4	-1756.4	-558.8	318.6	146.6	-649.4	-206.8	1649.8	555.4	1489	528.4	2349	774	1855.8	387.2	1070.6	387.2	-559	-176.6	364.2	143.6	1939	663	600.6	-249	2128.4	-161.6	-497.2	-161.6	1279	454.8	1072.8
	Firmicutes	F.B.	2090.6	695.4	2106.2	687	-11.2	810	278.4	37	-69.8	-39.4	-44.2	-2.6	-1919.8	-684.6	1206.8	352	-5786	-1955	-63.6	6.8	-2446	-867	874.4	254.8	1288.2	428.6	1193.6	390	1369.8	443	886.4	300.4	-2041.6	-666.2	26.6	21.4	1725	545.4	741.4	228.4	1411.8	453.4	-901.8	-309.6	962.2	285.8	922.4
	Firmicutes	F.B.	2133.8	716.4	1550	508.6	-1973.6	-681.4	235	38.2	-130.2	-40	-63.8	-14.2	-2015.2	-675.2	1108.6	346	-5050	-1725	-32.6	10.2	-2274.4	-796.2	936.4	263.4	1094.2	375.8	1187.4	370	1278.6	411	850.4	281	-2834.2	-887.6	-30	-13.4	1597.4	510.2	717.4	231.2	1367.4	448	-721	-240	973.8	306.8	985
	Firmicutes	F.B.	1875.2	644	1769.6	587	-2098	-753.4	322.6	71.4	-108	-18	-51	-7.2	-1559.2	-537.6	1121.6	349.8	-5311.4	-1795.6	-9.6	1.6	-2206.8	-735	930.4	282.4	1101.8	369.4	1168.8	389.6	1303.2	419	891.2	294.4	-1288.8	-439	16	18	1201.8	390	871.2	308	1193.6	382.6	-686.6	-210.4	976.8	324.6	932.6
	Firmicutes	F.B.	1866.2	627.8	1633.8	529.6	-2201	-743	96.4	-14.8	-175.2	-55.2	-58.6	-10.2	-1667.6	-538.6	1319.6	413.8	-5700.4	-1968.2	259.6	198.2	-2595.6	-932	874.2	278	1137.6	391.8	1146.8	359.2	1310.4	427.6	813.2	275.8	-1748.8	-606.2	-9.6	1.6	1315.8	422.8	792	234.2	1176.8	368.2	-963.6	-328.2	1057.4	346.6	1006.8
	Firmicutes	F.B.	2139.6	734.8	1384.4	445.4	-2227.6	-777.2	127.4	4.8	-213.6	-53.6	-54.4	-21.4	-1315.6	-477.4	1080	308.4	-4755.6	-1634.8	-40	-12.4	-2314.8	-831.6	890.6	271.6	1014.6	352.6	1008.2	322.4	1119.8	369.2	749	268.2	-2165.8	-739.4	-30.8	-3.4	1326	415.2	726.6	235.2	1228.6	408.2	-670	-255	1119	375	958.2
	Firmicutes	F.B.	1717.8	583.8	1515.6	477.4	-2199.6	-763.4	195.4	18.4	-117	-13.4	-60	-7	-1451.8	-487.8	1134.2	351.8	-4857	-1655.6	-56.4	-5.8	-2126	-755.2	959	320.6	1054.8	364.2	1045.8	321.4	1162	401.4	823	281.2	-1911.8	-621	8.6	2.4	1286.8	399.2	734	241.4	1220	405.6	-578.4	-184.2	1081.2	362.2	963.2
	Firmicutes	F.B.	1950.8	660	1864.6	596.4	-1997	-693.4	154	-8.2	-157.4	-64	-75.4	-11.6	-1503.6	-503	1016.4	311.8	-5437.4	-1835.6	-61.8	-15.4	-2630.4	-916.2	1114.4	407.6	1094.6	386.2	1142.2	359.6	1248	414.4	869	297.4	-1789.6	-604	11.4	4.8	1378.2	432	802.8	241.4	1283.2	401.6	-886.6	-296	1120.8	393.2	1064.8
	Firmicutes	F.B.	1823.6	594.6	1896.8	627	-2264	-820.8	200.8	31.4	-160.4	-49.8	-46	-7.6	-1492.4	-511.4	1574	492.8	-5292.2	-1825.4	-37.6	-3.2	-2597	-905	851.8	262.8	1002.4	335.4	1048	335.2	1186	384	793.2	278.6	-2294.6	-700.6	-1.8	16.2	1306.4	408.4	816	244.4	1206.6	386	-1117.6	-368.2	1017.6	329.2	855.8
	Firmicutes	F.B.	1815.4	610.6	1545.6	490.6	-2109.4	-744.6	203	35	-106.2	-10.6	-25	-12	-1606	-590.8	1180	368.2	-5436	-1797	-15.2	-0.8	-2433.6	-830.6	914.4	264.4	1052.8	365.8	1069.2	335.2	1256	408.2	793.6	259.4	-1462.4	-451.2	8.4	10.6	1337.2	365.6	823.4	264.8	1265.6	419.2	-954	-307	1025	344.4	918.8
	Firmicutes	F.B.	1689.6	557.6	1542	508.8	-2089.6	-715.6	289.8	48.8	-69.6	-7	-35	10.4	-2117.6	-743.4	1053.2	319.4	-5473.2	-1921.8	-44.8	0.4	-2450	-862.2	918.4	276.2	1053.2	381.8	1136.8	381	1160.2	391.6	766.4	282.6	-1838	-558.2	19	9.8	1634.6	518.2	810.8	268	1531.6	494	-768.6	-237.6	1049.2	347.4	946.6
	Firmicutes	F.B.	1750.6	599.4	1590.4	534.4	-1639.6	-583.8	195	43	-117	-55.4	-28.2	-2.8	-2070.6	-678.8	1083	317.4	-6002.4	-1996.2	-50	-5	-2338.2	-813.2	1896	740.6	784.2	267.6	1033.8	309.4	940.4	309	713	276.4	-1293.2	-434.4	31	9.2	1675.6	532.2	737.6	253.8	802.2	262.2	-872.4	-310.2	920	297.6	964.4
	Firmicutes	F.C.	4435.8	1479.8	4918	1615.8	593.8	183.6	1865.2	625	1085.6	359.4	465.4	178.8	834.4	209.6	3327.2	1076.8	-2505.2	-837.6	348.4	150.6	-831.8	-282.2	2351.8	749.8	3203	1125.4	4281.2	1422.8	2595.8	893	1922.8	683.6	-1609.8	-510	901.8	330	2858.6	949.8	1885.6	656	2725.4	893.6	-547.8	-166.4	2182.2	747.6	1571.6
	Firmicutes	F.C.	4345	1495.8	4697	1548.8	735.4	212	1818.8	614	997	358.6	429.2	175.2	914.6	318.4	3248.8	1076.8	-1867.2	-616.8	422	170.2	-388.8	-125.8	2585.6	843.4	3186.2	1102	4242.2	1399.4	2528.8	825.6	1839.6	657.8	-2665.2	-842	761.6	275.8	2810.4	953.6	1993.6	672	2718	885.4	-201.6	-51.2	2183.6	752.2	1728.8
	Firmicutes	F.C.	4229.6	1453	4582.6	1523.8	540.8	132.4	1701.6	583.4	1004	349	414	177.2	915	289.8	2983.8	992.6	-2399.6	-746.4	345.8	154.4	-825.6	-233.6	2184	723.2	3019.6	1080	4165.4	1384.6	2607.6	880.8	1900.2	669.2	-649.6	-250	849.2	308.6	2613.4	867.8	1741.8	613.2	2573.8	841	-441.4	-116.4	2061.8	714	1575.4
	Firmicutes	F.C.	3974	1387.2	4540.4	1502.4	262.8	50.8	1604.8	552.6	850.4	274.6	385.6	145.8	959.6	326.4	2642.4	740.8	-3057	-962.8	378.8	157	-1069.6	-331.2	2374.4	779.8	2932.4	1031.2	4016.4	1325.8	2388.2	808.6	1788	653	-1365.6	-411	719.4	271.6	2688.8	892.4	1781.6	620.6	2693.6	909.6	-644.2	-220.8	2205.8	752.2	1388.8
	Firmicutes	F.C.	3981.6	1372.2	4434	1483.2	408.6	126.2	1595.2	538.4	965.8	326.2	414.4	166	793.6	249.4	2927	965.2	-2926.8	-1015.6	339	132.8	-838.2	-298	2097.6	696.6	3070.2	1068.4	3967.8	1291.8	2389.4	846	1794.8	625.6	-1769.2	-554.6	820	310.6	2741.6	924.2	1785	622	2667.4	894.4	-502.4	-170.2	2076.6	735.6	1680.8
	Firmicutes	F.C.	4056.4	1384.6	4419.8	1473.6	582.6	163	1645.4	568.6	1016.8	353.6	398	168.6	968.2	274.2	3176.2	1030.2	-2537.8	-874.6	407.2	170.8	-569.8	-189.6	2474	821.2	3043.2	1070.6	3976.8	1335.2	2387	829.8	1774	640.6	-1337.6	-412.6	773.4	297.8	2774.2	950.6	1787.2	612.4	2675.2	904.2	-455.2	-134	2131	731.6	1680.8
	Firmicutes	F.C.	4226	1407	4782.6	1578.8	315.8	125.8	1702	557	921.8	334	369.2	169.6	954.6	291.2	3150.8	1039	-3145.6	-1002.4	367.8	162.2	-995.2	-343.4	2302.2	730.4	3081.8	1081.6	4088.4	1366.8	2122.4	519.6	1837.2	658.6	-1490.4	-501.4	823.2	293.4	2817.8	946	1745.8	604.4	2759	935.4	-768.4	-207.4	2162.6	776.6	1523
	Firmicutes	F.C.	4051.2	1414.4	4579.4	1503	462.2	143	1662.4	556.2	957	325.6	421.6	169.4	951	321.6	3258.6	1064.2	-2858.2	-941.2	399	163.8	-797.4	-279.4	2431.8	816	3030.4	1068.6	4039.6	1336.2	2400	829.6	1801.2	651.8	-886.2	-312.4	746.6	281.8	2725	931.4	1883.2	639.4	2853.4	957	-841	-266.2	2162.8	750.4	1505.6
	Firmicutes	F.C.	4104.2	1402.6	4415.2	1478	570.6	173	1590.4	538.6	939	313.6	432.6	177	822.6	257	2952	941.4	-2537.4	-841.2	335.4	151.8	-1056.2	-337.2	2165.8	708.2	3046.4	1058.8	4011.8	1337	2430.2	818.2	1754.2	616.8	-1294.8	-455.4	789.8	273.8	2779.8	937.8	1765.8	624.4	2793.4	904.4	-725.2	-245.2	2067.2	720	1476
	Firmicutes	F.C.	4116	1409	4465.2	1478.8	441.8	134.4	1736.6	582.8	1084.4	351.8	434.8	162.8	812.8	230.6	3398.8	1083.6	-1631.2	-501.8	410	176.2	-449.2	-146	2465.2	817.4	2962.2	1057.4	4090.2	1373.8	2446.6	825.6	1829.6	661.4	-824.8	-273	840.2	307.2	2792.6	932.6	1812.4	631.8	2729.8	923.8	-365.4	-110.8	2205	744.4	1571.2
	Firmicutes	F.C.	4091	1402.6	4457.8	1472.8	437.6	126.2	1732.6	597.4	1051	343.6	400.8	179.2	886.4	252.4	3359.2	1117.2	-1723	-620	415.6	174.6	-391.2	-115.8	2571.6	877.2	3002	1049.2	3883.4	1305.8	2338.6	793.8	1783.6	617	-1493.2	-487.6	807.8	299	2933.6	997.8	1878.8	648.8	2766.2	917.2	-489.2	-150.8	2228.2	760.2	1551.4
	Firmicutes	F.E.	2798.8	972.4	3516	1156.2	-290.6	-87.6	901	314.4	810.6	290.4	364.6	136.6	-221	-45.4	1304.2	436.2	-1486.2	-485.6	341.4	124	-498.6	-154	716.2	229.6	1177.4	425.8	1852.6	622.8	1031.6	339.4	639.4	248.4	-1516.8	-533.4	244.6	102.8	1021.8	338	604	203.2	1088.4	366.6	-760.6	-234	620.4	216	317.6
	Firmicutes	F.E.	2786.8	959.2	3446.4	1148.2	-393.2	-100.2	951.2	301.6	859.8	279.4	363.6	127	-241.4	-103.8	1334.6	444.2	-1126.2	-376.8	324	134.6	-204.4	-84	885.8	291.8	1147.8	433.6	1774.2	601.4	990.6	328.8	622	219.4	-2464.4	-749.4	228.8	80.2	1060	360.2	626.6	236.2	1123	368.2	-552.2	-154	680	242.8	412.8
	Firmicutes	F.E.	2700	908.8	3443	1123.4	-157.8	-72.2	908.4	271.6	847.2	286.4	379.6	153.6	353.6	402.4	1376.6	457.6	-1238	-430	366	131	-576.6	-181.4	644	214.8	1122	404	1800.2	623.4	985.4	349.6	648	238.2	-1261.2	-461.4	247.2	91.4	1016.8	337.8	622	217.6	1090	363.4	-643.2	-206.4	621.8	226.6	369.8
	Firmicutes	F.E.	2598.8	885.8	3254.8	1048.2	-666.4	-223.4	759	253	750	251.6	351.8	130.8	-334.2	-126	1355.4	441.4	-1901.2	-618.8	337.4	133.2	-682.8	-237.6	618.8	215.8	1094	399.8	1708	561.8	856.4	306.4	635.8	232.6	-1482.4	-490.2	270.4	112.2	1001.6	356.8	619.8	235	1063.8	361.2	-799	-229.2	575.4	207.4	329.2
	Firmicutes	F.E.	2573.2	886.4	3266.6	1075.4	-433.2	-132.4	792.4	241.6	771	247.6	342.4	140.6	-192.6	-92	1354.4	476.4	-1719.6	-601	364	133.6	-376	-133.6	593.2	220.6	1132.2	400	1663.4	564	853.4	299.8	595.8	213.2	-1817.2	-575.2	240.2	115.2	993	340.8	620	223.2	1044.4	346.8	-723.2	-222	624.6	232.8	346.4
	Firmicutes	F.E.	2551.6	885.2	3335.6	1085.4	-333.8	-103	860	270.8	791.2	269.8	362.8	144.2	-95.6	-40.6	1398.4	464.2	-974.4	-381.8	385.6	148.6	-590.4	-204	768.6	251.4	1112.8	420.2	1689.6	567.8	924.4	303.4	572	226.8	-1408.8	-437.6	248.4	101.4	1020.2	364.6	576.6	227.6	1051.4	359.4	-619.6	-177.4	641.4	249.8	427.2
	Firmicutes	F.E.	2757.4	931.4	3432.4	1126.4	-272.6	-115.6	868.8	258.4	818	276.4	374.6	140	-285.2	-92.2	1415.2	473.6	-1904.2	-662	401	151.8	-641	-237.6	723.6	258.4	1114	399.6	1745.2	596.8	957.4	322.6	643	242.8	-1080.6	-342	249.6	98.6	1049.6	354.4	598.2	223	989.8	336.6	-815.4	-264	601.4	211.4	369.8
	Firmicutes	F.E.	2625.4	904.2	3343.4	1101	-375.4	-157.6	842.8	278.8	783	259.2	358	136.4	-103.6	-75.2	1334.4	449.8	-1658.6	-579	387.4	155.8	-539.2	-170.2	745	247.2	1131.8	406	1696	584.8	972.8	330.2	603.8	225.6	-1333.6	-472.2	248	93.4	935.6	327.4	609.8	236.8	995.6	339.2	-917.4	-267.8	575.8	206	292.2
	Firmicutes	F.E.	2611	870.6	3273.8	1075.2	-237.6	-63	961	367.2	803.2	276.6	391.8	132.2	-117.6	-9.2	1390.6	463.4	-1437.4	-538.4	401.6	171	-504.6	-167	690.2	238.2	713.4	210.2	1814	615.4	921.4	332	598.4	229.6	-1059.6	-397.6	268.4	104.4	1032.4	373	635.6	218.2	1127.8	382.2	-784	-246.2	528.8	196.6	328.8
	Firmicutes	F.E.	2649.4	930.8	3402	1113.2	-256.6	-118.8	877.2	277.2	818.6	278	367.6	141.2	-69	-2.6	1362.2	464.8	-615	-262.2	364.2	161.2	-199.4	-60.6	850.6	306.8	1074.4	397.8	1738.6	596.2	1012.6	337	633	241.4	-1166.6	-409.8	261	97.8	978	343.6	593	238.8	1191.2	398	-564.4	-199.4	670.8	240.6	367.4
	Firmicutes	F.E.	2492.2	861.2	3209.4	1088.8	-298.4	-118	918.8	329.4	753.4	247.8	547.2	235.6	-165	-59	1364.4	477	-1106.2	-382.4	360	139.2	-245.2	-121.8	867.8	279.8	1223.4	459.2	1811.4	619	1050	413.4	663.6	254.2	-671.4	-264.2	274	107.8	1066.8	350.8	649.4	238.8	1189.8	392.2	-655.2	-207.2	631.8	216.8	388.4
	Firmicutes	F.R.	4080.2	1542	5178.4	1901.6	810.8	430	1713	725.8	798.8	459.8	282.8	263.6	2682	1058.4	3300.4	1238.2	-1384.6	-305.6	429.8	305	117	145.4	2219	922.8	2421.6	1082.2	4510.6	1767	2669.8	1085.4	1669.6	780.4	-866.2	-112.4	378.6	300.8	3110	1232	2241	944.8	3181.4	1220.8	-658.6	-31.6	2269.4	984.2	1527.4
	Firmicutes	F.R.	4024.4	1546.6	5072.4	1879.8	973.4	445.8	1717	727.6	882.8	474.4	247	263.8	1153.6	470.8	3205.6	1223.6	-872.2	-199.6	399.8	310.2	364	272	2258	892	2520.2	1104.8	4565.8	1756.6	2738.6	1118.8	1552.6	743.8	-2618	-672.8	298.2	290.4	3116.8	1230.4	2233.2	955.4	3111.4	1226.2	-366	71	2277.4	953	1562.8
	Firmicutes	F.R.	3810.4	1463.8	4963	1848.2	1161.2	510.4	1650.4	682.8	735	406.4	238	247	1318.6	577.2	3286.4	1238.8	-1055	-217	393	300.2	164.4	227.6	2277.4	922.8	2244.6	974.4	4171.4	1601.6	2625.4	1059.8	1450.4	707.6	-1225.4	-200.6	287.2	258.6	3096.4	1195.4	2233.6	942	3041.6	1202.2	-567.4	-8.6	2193.8	937.4	1537.2
	Firmicutes	F.R.	3812.2	1500.8	4874.2	1846.6	539.2	297	1537.2	690	825.2	432.8	242.4	256.8	760.6	396.6	3339	1267.8	-1490	-355.8	339.2	274.8	-147.4	100.4	2232.4	884.2	2413.6	1069.8	2688.8	1153.8	2625	1049.4	1543.6	737	-1660.4	-371.8	357.2	291.8	3166.4	1233	2331	958.4	3201.6	1261.2	-745.2	-76.8	2217.4	956.8	1521.2
	Firmicutes	F.R.	3806.4	1462.2	4774	1750.6	533.6	325.8	1490.4	662.4	741.2	436.6	233	251.8	1372	608.8	3355.4	1294.2	-1084.4	-252.6	358.6	291	12.4	153.8	2238	921.2	2241.2	1014.2	4424	1742.4	2533	1051	1523.8	715.2	-2073.6	-491.6	287.4	296.6	3085.8	1228.8	2280.4	943	3157.4	1275.2	-637.4	-52.8	2177	947.4	1560.4
	Firmicutes	F.R.	3675.8	1426	4618.8	1744.2	723.2	340.2	1575.4	694	755.4	413.4	222.2	240.6	1271.6	551.4	3306.2	1252.6	-685.2	-98.2	373.8	289.8	124	190.4	2268.2	935	2225.4	959.6	4162.4	1630.8	2551.4	1036.8	1538.8	729.6	-122.8	103.2	329.2	265.8	3111.6	1223.6	2261.4	958.6	3069	1244.2	-658.2	-33.8	2100.6	933.2	1458
	Firmicutes	F.R.	3758.6	1470.8	4926.2	1827.2	565.2	297.6	1624.2	693.8	677.4	369	203.4	221.6	1401.8	572.2	3298.4	1241.8	-1729	-399.8	381.2	314	-105.2	144.2	2352.4	983.2	2186.8	948	4276.2	1666.6	2561.6	1041.6	1524.2	727.6	-1807.6	-390	283.4	272.4	3308.4	1322.8	2368.6	1026.2	3293.6	1294.4	-847.6	-107.2	2275.8	946.6	1586.4
	Firmicutes	F.R.	3704	1446	4809.8	1759.6	678.2	376.2	1608.6	701	675.4	395.4	212.2	229.8	889.6	439.6	3383.6	1275	-1055.8	-169.2	359.2	263.2	59.4	150.8	2185.4	895.6	2132.2	959.6	4198.6	1629.6	2481.8	1035.8	1437.4	683.8	-816	-14	258.2	257.2	3068	1235.8	2280.4	948.6	3186.8	1250.8	-867.4	-133.2	2133.2	903	1009
	Firmicutes	F.R.	3668.4	1435.8	4750.8	1791.2	706.2	372.2	1522.8	675	698.8	385.2	267.4	252.4	967.4	394	3530	1298.4	-788.4	-158.6	425	312	45.2	189	2305	958	2207.6	968.2	4210	1652.6	2583	1063.6	1526.8	715.4	-1169.8	-238.6	317.6	257.4	3281.8	1292.2	2417.6	1001.2	3273.6	1276.2	-838.6	-73.4	2199.8	958.2	1500
	Firmicutes	F.R.	3822.6	1474.2	4731.6	1742.8	989.2	462.2	1630.4	704	796.4	437.2	271.6	263.6	1257	556.2	3327.2	1232.6	-418.6	-27.8	443	325.8	389	270.8	2219.2	932	2331.8	1009.8	4238	1669.2	2541	1032	1558.6	738.2	-1079.4	-226.2	342	293.4	3142.6	1223.4	2351.6	981.4	3232.2	1261	-552.6	-35.6	2257.4	983.8	1518.6
	Firmicutes	F.R.	3437.6	1364.6	4548	1678.4	992.2	467.6	1356.8	598.2	678.4	374.6	253.4	254.6	1172.6	541.2	3393.2	1242.8	-723.8	-107.2	426.4	295.4	408.2	282.2	2287.8	910.8	2281.8	999.2	4230.2	1630.2	2500.6	1037.4	1416.4	688.6	-1001.2	-146.4	298.6	270	3103.2	1218.2	2299.6	964.2	3161	1270.2	-523.8	-11.8	2219.4	901.8	1468
	Firmicutes	F.L.1	1131.4	431.4	2240.4	821.2	-345.4	-94.6	349.2	134.4	778.6	350.2	204	106	-462.2	-119.2	690.4	253.8	-2137.4	-652.4	120.2	64.8	-592.2	-181.8	318.8	107	669.8	271.4	1255	481.4	784	308.8	438.2	183.4	-1482.8	-439.4	181.8	90	825.4	309.4	493.2	203.8	853.8	320.8	-846	-257.2	471.8	201.6	368.4
	Firmicutes	F.L.1	1531.2	581	2724.2	990.6	-242.8	-75.4	535	203.4	482.8	193.8	1748	830	88.6	50.8	978.4	351.6	-1258.6	-450.6	273.4	110.2	-365	-123.8	660.4	249.8	803	334.8	1499.6	616	1045.2	393.2	496.4	218.4	-2448.4	-729	214	107.8	1066.8	384.2	828.2	360.2	1153	409.4	-690	-186.2	676.2	288	605.2
	Firmicutes	F.L.1	1106.8	431.2	2218	788	-479.6	-133.2	349.6	162.4	295.6	121.4	197.8	87.8	-135.6	-28.8	895.2	318.2	-1164	-345	268.4	116.4	-309.4	-97.8	579.2	214.8	586.8	253	1219.8	465.6	706.6	259.2	417.8	191	-1189.8	-341.6	100.4	67	702.6	253.4	589.4	227.8	1089.6	411.4	-796.2	-229.6	573.4	222.2	517.6
	Firmicutes	F.L.1	1067.2	421	1893	697.6	-855.8	-287.2	241.6	84.2	232.2	91.4	152.8	83.6	-189.2	-61.2	928	339.6	-1388.6	-459.6	253.6	121.4	-628.6	-228.2	579.4	239.4	480.4	197.6	920.6	345.4	620.8	239.2	339.4	170.6	-1905	-598.6	85.6	69.8	1061.4	378.4	681.8	245.2	1189.4	422.4	-1076.8	-373.2	623.2	244.8	556.8
	Firmicutes	F.L.1	1408.8	541	2374.8	874.8	-412.6	-138.8	355.2	135.8	399	136.4	262.6	109	2190	1221.2	940.8	337.6	-1163.2	-400.2	261.2	111.2	-394.4	-134.4	636.6	205.4	726.2	306.8	1346	522	798.4	317.4	459.4	174.4	-1507.2	-547.4	250.6	122.2	1086.2	382.4	654	275.8	1143.2	426.8	-941.4	-339.6	641.6	253.2	392.8
	Firmicutes	F.L.1	1324.2	501.8	2276.2	837.2	-299.2	-66.6	379.8	152.4	383.2	148.2	240.6	101.8	-283.6	-88.2	636.4	243.4	-1082	-378	183.2	69.8	-335.4	-133.8	395	158.2	706.6	295.2	1342.4	509.6	943.6	370.2	469.4	207.6	-1335.2	-409.8	242.2	117.6	803.4	284.2	456.6	174	875	319	-918.2	-291	487.2	183.4	441.2
	Firmicutes	F.L.1	1628.4	618.4	2629.2	943	-452	-108.4	451	177.2	544.2	196.8	323	136	-439.8	-125	887.4	347	-1567.6	-504.6	241.8	159	-520	-162.8	543.8	202.6	797.6	338	1411	530.4	933.2	346.4	504.4	207.6	-1409.6	-516	259.4	120.2	1048.6	381.6	607.6	227.4	1034.8	367.2	-1197.8	-375	647	256	504.4
	Firmicutes	F.L.1	1470	551.2	2540.8	944.8	-447.2	-132.6	444.6	158.4	545.8	177.4	298.6	114.6	-472.6	-158.2	663.6	248.8	-648.4	-155	106.2	56.8	-621.4	-190.2	305.8	139	728.6	317.8	1358.4	519.2	895.8	348.8	480.4	206.4	-1262.2	-385.2	313.4	125.2	746.8	281	439.6	159.2	797.8	307.4	-1220	-355.8	422.6	173.4	306
	Firmicutes	F.L.1	1427.8	555.6	2513.8	905	-339.8	-84.6	446.2	153.6	466	166.4	285.2	125.8	-15.4	4.2	794	282.2	-855.6	-281.2	224.4	112.4	-441.2	-127.4	451	185.6	756.6	324.4	1395.8	539.6	908	341.4	544.4	242.2	-1094.4	-311.2	280.2	117.2	970.2	351.2	625.2	248.4	1085	410.2	-1080.2	-373.2	564.6	215.2	367.4
	Firmicutes	F.L.1	1348.2	521.2	2571	977	-193.2	-77.2	469.4	180.4	491.2	180.8	169.4	50.4	-289.2	-65.6	927	332.4	-1264	-385	242	98.2	-341.8	-114.2	589.6	204.8	744.6	314	1383.8	524.2	935.8	338.8	535.4	204.6	-937.2	-275.2	240.8	105	1026	364.4	693.6	249.4	1236.4	455.8	-894.6	-264.4	670.4	273.8	520.8
	Firmicutes	F.L.1	1156.8	452.8	2035	739.4	-203	-50.2	283.8	113.2	315.2	138.6	195.6	77.4	-180.4	-67.6	925.4	342.2	-1056.6	-309.6	272.2	108.6	-392.8	-132.2	570	201	612.6	254.8	1196.8	447	678.8	254.4	423.8	173.4	-861.8	-247.4	200.6	81.2	1026.6	382.8	637.8	252.4	1149.4	407.6	-885.8	-263.2	619.4	244.6	528.2
	Firmicutes	F.L.2	4122.8	1451.6	4280.6	1469.4	1558	522.2	1311.4	472.8	370.6	161.4	217	92.8	3005	1025.6	1202.6	394.8	-813.2	-258	504	277.4	-97.2	-54.6	1430.6	523.8	1717.8	648.4	2594.2	924.2	1827	366.8	972.2	366.8	-867.8	-208	325.2	142.6	1232	459.8	1977	693	2529.4	-44.4	-279.8	-44.4	1199.8	459.8	1076.6
	Firmicutes	F.L.2	4050	1422.4	4283.4	1446.6	1212.2	457.6	1200	452.8	264.4	121.8	180.4	95	3053	1036.4	1369	472.2	-1109	-352.2	185.8	95	-183	-23	1695.6	608.8	2175.2	804.2	2919.8	1016.4	2114	423.2	1058.2	423.2	-394.8	-114.2	436.6	183	1368.6	507.4	2092.4	736.8	2569.2	-49.8	-301.8	-49.8	1373	512.2	1083.8
	Firmicutes	F.L.2	4015.4	1394	4199.8	1410.6	1349.8	485.8	1246.4	470.6	315.4	124.6	161.6	80.2	2877	968.8	1325.8	448.4	-877.4	-225	147.6	80.4	-191.4	-47.6	1444.2	509.8	2063	759.8	2770.2	970.2	2129	379.6	966.4	379.6	-1106.6	-316	383.4	162.6	1210.8	453.2	1964.6	682.6	2410.2	-75.4	-291.8	-75.4	1176	436	1047.2
	Firmicutes	F.L.2	4049.6	1382.6	4164	1414.8	1478.8	489	1332.6	466	427	160.2	183.6	104.4	2844	978.4	1293.8	467.2	-631.4	-225.6	142.2	87	-131.8	-12.4	1351.8	484.6	1878.6	691.4	2692	946.2	2047.8	335.6	872.6	335.6	-594.2	-220.8	380.2	159.6	1116	428.4	1849.4	672.8	2386.6	-58.4	-254	-58.4	1158.2	428.2	1037.2
	Firmicutes	F.L.2	3893.6	1372.2	4113.8	1377.6	1408.2	497	1235	463	260.2	119.2	133.8	62.2	2783.2	950.6	1208.6	384.2	-720.2	-277	148.4	80.4	-159.8	-29.4	1288.4	463.4	1906	775.8	2440.8	869.2	1875.8	312	797.2	312	-1217	-360.2	243	121.6	1211.8	448	2028	722.8	2231.2	-49.2	-191.8	-49.2	1178.8	435.4	1042
	Firmicutes	F.L.2	3733	1324	4012.8	1372.2	1484.4	501.2	1091.2	400	242.2	110.2	156.4	79	2578.8	885.2	1205.4	395.8	-796.2	-270	145.8	90.8	111	155.8	1327.2	493.6	1634.8	615.8	2170.8	782	1855.8	343.2	874.8	343.2	-1066.8	-325.2	271.4	132.4	1193.8	436	1981.6	681.8	2273.6	-44.6	-279.2	-44.6	1202.4	443.8	1005.4
	Firmicutes	F.L.2	3557	1261.2	3821.8	1316.2	1461.2	521.4	1092.8	417.2	231	104.8	165.6	92.8	2841	964.2	1271.8	448	-816.6	-276.8	168.8	93.6	-296.6	-113.2	1355.4	460.6	1473.6	556.4	2056.4	759.2	1822.6	344.2	907	344.2	-551.8	-215	244.8	120.8	1145.6	434.2	1912	650.6	2218	-65.8	-236.8	-65.8	1146.2	431.4	984.8
	Firmicutes	F.L.2	3212.6	1150	3059.6	1061.4	1571.2	571.6	1081.4	417.2	345.6	147.6	184.2	101.6	3145.2	1073.8	1380.4	465.4	-992.4	-254.4	144.6	84.6	-266.8	-79.6	1549.8	557.8	1726.2	635.2	2099.2	776.2	1914.8	392.4	1012	392.4	-571.4	-224.6	355.8	153.6	1236.2	467.6	2022.6	713	2438.2	-83.6	-324.8	-83.6	1269.2	470	1129.2
	Firmicutes	F.L.2	3631	1289	3737.8	1313.4	1490.2	491	1229	452.8	243.6	129	170	96.6	2878.4	983.8	1338.6	440.8	-532.8	-180.2	80.8	65.4	-97.2	-42	1383.8	468.2	1753.2	635.8	2232.8	815.4	1840	354	937.8	354	-467.2	-144.6	273.4	133.6	1141.6	410.2	2008.8	687.8	2191	-73	-310.4	-73	1151.2	430.8	972.6
	Firmicutes	F.L.2	3667.8	1275	3773.8	1292	1541	526.4	1204.2	437	367.6	139.8	194.4	97.6	2767.6	946.4	1234	419	-866.6	-300.2	162.6	96.8	-163.4	-52.8	1353.4	491.8	1690.6	641	2244.8	804.2	1914.8	384.8	987	384.8	-365.4	-90	360.8	163.2	1125.8	423	1879.4	665.6	2260.2	-59.2	-222.8	-59.2	1194	444.2	990.2
	Firmicutes	F.L.2	3514.6	1250.4	3571.6	1229	1453	472.8	1148	437.2	299.2	124	167.2	96	2971.6	1014	1336.2	445.2	-608	-203	164	92	-119.2	-9.8	1563.4	523.2	1474.8	561.4	1959.6	715.2	1716.6	350.8	899.8	350.8	-533.4	-141.6	301.8	142.6	1219.4	439.2	2157.6	797.8	2253	-42.4	-207.6	-42.4	1299.2	484.2	1012.8
	Proteobacteia	P.E.1	2494.2	968.8	3115.6	1145.6	537.8	247.6	994.4	409	1196.6	436.4	650.4	279	579.4	203.4	2331.6	846	-2191.2	-614.2	450.4	222.6	59.6	24.2	1373.8	524.6	1707.6	684.4	2500.6	945.8	2456.4	899	1626	704.6	-580.4	-232.6	1300.4	514.6	2378.6	848.6	1384.4	519.6	2539.8	917.8	-415.2	-94.4	1552.4	603.2	1093.6
	Proteobacteia	P.E.1	2212.6	862.8	2819	1037.4	458.8	211.2	965.8	425.2	1115.2	399.4	468.6	221.4	712.6	291.8	2145.6	807.8	-1840.6	-527	566	253.8	359	182.6	1476.4	564	1428.2	567.4	2249.4	822	2202.6	850.4	1130.4	465.6	-1765.2	-562	743.8	311.4	2322.6	844.8	1350.8	509.4	2562	941.4	-122.2	-1	1432.8	543.8	1263.2
	Proteobacteia	P.E.1	2264.8	871.2	2853	1063.6	401.2	169.2	938	406.8	1163.8	415.4	614.8	265.4	545.6	235	2245.8	828.8	-1436.2	-379.4	502.6	212.8	151.6	119.2	1356.8	527.4	1516.6	597.2	2279.2	851.4	2142.8	766.8	1202.4	502.8	-402.4	-148.4	959.8	372.2	2263	840.6	1423.6	534.6	2402.6	857.6	-328	-69.6	1461.8	567.6	1137.4
	Proteobacteia	P.E.1	2291	892.2	2876.6	1081	94.6	100.8	942.8	400.2	1050.2	364	589.6	246.6	631.6	244	2371	856.6	-2350.2	-729.2	458.8	233.2	-3.4	61	1395.4	545.2	1580.6	661.4	2444.8	908	2198.2	811.2	1277.4	541	-1380.8	-439.6	1055.2	396.8	2172.2	798	1452.2	580.6	2478.8	887	-594.8	-149	1597.6	598.8	1062
	Proteobacteia	P.E.1	2175.4	860.2	2924.4	1095.4	311.6	158.8	966.4	419.4	1215.4	443.2	689.4	303	747.4	272.6	2330.2	820.8	-1510	-499.4	496.6	197.8	237.2	142	1460.2	536	1462.8	596.8	2238.6	855.4	2102	798.6	1222.6	500.2	-304	-114	1003	411.4	2273.6	826.6	1424.2	555.6	2523.6	905.2	-328.8	-88	1484.4	561.8	1111
	Proteobacteia	P.E.1	2083.2	803.8	2546.6	945.4	265.8	173.8	921.6	378	952.6	333.6	535.6	227.8	581.6	243	2273	807.6	-1365	-377	533.6	228.2	254	143.8	1484.2	570.8	1326	563.8	2103	801.6	1976.2	732.8	1100.4	464.4	-898.6	-219.8	837.6	347.8	2227.4	803.2	1369.2	498.4	2355.4	848.6	-283.8	-81	1410.8	559.8	1064.6
	Proteobacteia	P.E.1	2295.2	893.2	2853.8	1058.4	333.8	186	931	392.2	975	363.6	534.8	221.8	636.6	283.6	2489.2	872.8	-2386.2	-720	516.2	218.2	-41.6	43.6	1540.2	597.2	1378.6	585.6	2129.2	812.4	2153.6	780.6	1186.4	494.8	-1244	-382.2	819	355.6	2352.6	858	1583	596.4	2656.8	922	-691.8	-191.4	1613.6	620.4	1241.8
	Proteobacteia	P.E.1	2337	891.2	2893.6	1074.6	429.6	211.6	974.8	405.4	1141.2	401.8	608.2	251	595.6	253.6	2289.2	831	-1309.6	-338.4	330.6	162	13	44	1308.6	514.2	1915.6	788.8	2241.6	836.6	2213.8	817.6	1199.4	521	-281	-85.2	1134.4	432.4	1856.4	688.4	1116	446.8	2008.4	744.2	-994	-292.6	1115.6	467	765.2
	Proteobacteia	P.E.1	2173.8	826.4	2710.8	1005.8	362.2	122.6	689.2	304.2	92.6	-176.6	537.4	235.6	575.6	215.4	2339.2	842.6	-1215.8	-375.2	484	209.2	19.8	71.2	1389.2	525	1298.2	534.2	2070.2	785.4	1997	755	1130.2	479.4	-570.2	-160.4	880.6	352.6	2026.4	754.6	1360.4	523.2	2373.8	876.2	-869	-263.8	1401.8	549.2	1074.2
	Proteobacteia	P.E.1	2249.6	872.2	2593.8	977.8	702.4	313.6	871	371	1249.2	455.2	651	269.8	488.8	249.8	2294	796	-1223.4	-285.6	373.8	179.6	239.4	129.6	879	549.4	1406.8	575.4	2122.8	801.2	2075.8	773.6	1218	506.6	-490.6	-135.4	988.8	382.8	1790.8	679	1050.6	421.2	2008	736.6	-781.6	-237.4	1205	484.8	940
	Proteobacteia	P.E.1	2091	807	2644.2	1025.6	470.6	217.8	957.8	397.2	1157	410.6	619.8	272.6	717	277.2	2373	853.4	-1430.4	-402	542.8	231	209.4	123	1520	577.6	1376.8	563	2206.6	834.8	2118.2	782.8	1256.6	495.2	-295.4	-64.2	1024	406.8	2174.2	782	1420	540.8	2388.6	820	-576.4	-159.8	1521.8	609.8	1230
	Proteobacteia	P.E.2	2258	915.2	2787.4	1043.8	990.4	413	1593.4	630.6	956.4	372.2	441.8	206	2824.4	1020.4	1556.4	601.4	-1842	-561	417.4	198.4	352	213	1939	710.4	1992	845.2	2359.8	909.8	2752.2	1029.4	1758.6	732	-1018.4	-265	667.2	303.4	2003.4	772.6	3086.2	1143.8	3140.6	1157.2	-313.6	-49.6	2065	832	1602.2
	Proteobacteia	P.E.2	2088.6	829.6	2747.4	1027.8	1019.4	380.6	1635.4	673.6	936	352	461.8	226.6	2694.2	999.6	1839.4	679.8	-2253	-693	391.6	177.8	628	254.8	1901	715.4	1943.8	776.2	2454.4	947	2603.6	977	1680.2	679.4	-757.8	-155.8	699.8	316.8	2159	839.4	3080.6	1129.6	3336.4	1238.4	-369.6	-48.6	2064.8	816.2	1692
	Proteobacteia	P.E.2	2178	890	2862.4	1092.8	1223.2	487	1705	688.8	1004.8	386.8	382.6	197	2682.2	963.8	1901.2	696.6	-1853.6	-506.4	412.4	185	716.4	294.8	1833.2	705.6	1959.4	796.8	2566	974.2	2552.8	968	1664.8	710.4	-1410.2	-384.4	680.2	301.4	2074.8	800.2	3026.4	1125.4	3336.8	1194.4	-308.2	-14.2	2045.2	806.8	1570.2
	Proteobacteia	P.E.2	2075.8	836	2654	988	1315.6	485.6	1626.4	646.8	835.2	336.4	380.6	190.2	2402.8	882.8	1780.4	642.2	-1297.6	-368	403.8	183.8	667	296.8	1860.4	701.2	1844.8	751.4	2368.6	916.2	2447.2	937.4	1544.8	652.6	-1176.4	-326.8	514.6	259.4	2133	819.4	2930.8	1085.2	3238.2	1164.4	-322	-76.6	1954.6	780	1575.8
	Proteobacteia	P.E.2	2088	852.4	2744.2	1029.4	1216.2	472.8	1668.8	664	1032.2	388	443.8	222.8	2534.2	904.4	1655.6	599.8	-1629.2	-392.4	450.4	243.6	743.6	317.6	1859.8	680.8	1922.6	801	2605.8	976.6	2636	984.2	1618.6	672	-1246	-395.2	663	305.6	2040	782.6	2920.8	1089.8	3130.2	1157	-297.2	-11.2	2038	810.8	1550
	Proteobacteia	P.E.2	2249	875.8	3021.2	1149.4	1624.8	614	1857.2	742.4	1038	388.2	480.2	232	2463.2	904.6	1516.4	579.8	-2031.4	-582.8	341.8	180.4	-983.6	-546.4	1761.4	688.8	1827.6	762.2	2534	992.8	2752.8	1040.4	1724.2	719.4	-1125.6	-321.8	695.2	311.8	1966.2	743.8	2893.6	1073.4	3062.8	1113.2	-425.4	-82.4	1930.2	760.8	1550.2
	Proteobacteia	P.E.2	2117.2	866.8	2894.2	1099.6	1423	521.8	1741	679.6	1055.8	390.2	505	226.2	2513	909.4	1505.6	568.4	-2060.4	-616.6	388.2	199.8	654.4	251.6	1805.8	691.2	1824.8	749.8	2493.6	961.4	2786.2	1022.4	1748.2	708.4	-504.4	-108.4	747.2	317.8	1979.8	750.6	2908.8	1073.2	3220.8	1170.6	-312.4	-37.4	1945.6	775.8	1524
	Proteobacteia	P.E.2	1825.2	732.2	2568.8	963.8	1613.4	619.4	1664.6	663.8	1077.6	451	409	191.4	2750.8	975.2	1971.4	704.6	-2379.6	-690.2	316.2	156.8	642.2	275.6	1880.4	719.4	1543	650.2	2262.8	896.8	2552.6	950.8	1414.4	614.8	-1160.6	-295.6	-43.8	-23.2	2086.6	805.6	2922.4	1070.6	3298	1203.6	-447.6	-61.6	1878.6	780.4	1522
	Proteobacteia	P.E.2	2058	841.4	2767.2	1041.4	1420	516.6	1809.8	695.6	1096.4	412.6	498.4	230	2590.4	919.4	1799	647.6	-1902	-534	277.8	134.4	744	247.2	1800.4	686	1816	763	2374	933.2	2775.6	1031.4	1788.2	749.2	-122.8	-80	739.2	330.2	1915.4	750.8	2768.8	1005	3083.6	1106	-429.2	-69.6	1849.8	740.2	1457.4
	Proteobacteia	P.E.2	1983.4	801.2	2599.8	1000	1344	548.4	1696.8	675.8	1055.6	391.2	498.6	224.6	2474.8	904.2	1767.4	641.8	-1721.8	-527.4	411	198.6	630.2	235.4	1876.2	693.4	1864.4	750	2329.8	923.6	2693.6	1002.8	1739.6	719.8	-496.4	-147.4	751.6	318.6	1955.2	746.2	2587.2	935.6	3150	1149.4	-322.8	-79.8	1455.8	570.6	-125.6
	Proteobacteia	P.E.2	2041.6	814.8	2785.2	1074.6	1297.4	492.2	1734.4	677.6	1060.4	393.6	499	233.4	2525.8	924.4	1705.4	589.6	-1742.4	-488.2	371.2	196	808.8	335.8	1853	683.4	1830	764.6	2344.6	908.8	2795.4	1086.4	1755	727.2	-189	-58	751.4	335	1995.8	770	2863.8	1069	3072.4	1139.8	-253	-28	1980.4	772.8	1522
	Actinobacteria	A.B.1	2996.6	1046.4	3124.6	1019.6	-11.4	-31.4	1297	416	775.4	250.2	292.6	114.4	2677	887.8	342.2	88.4	-2802.6	-947	299.6	107.4	-1043.4	-362.6	2192	715.4	2573	899.4	2957.6	1030.2	2132.6	740.2	1502.2	530	-2144	-706.6	235.6	97	1805	600	2342.8	805.2	2661.8	903.6	-635	-179.4	1896.2	634	1639.8
	Actinobacteria	A.B.1	2897.6	998	2988.8	976.6	44.6	2.4	1111.8	380.4	772.8	272.6	306.6	127.2	2576.6	851.2	480.6	150.4	-2623.4	-910.4	239.4	102.4	-850.4	-307.4	2098.4	691.6	2640	890	2963.2	976.6	2006.6	679.8	1400.2	495.2	-1817.4	-579.4	243.2	98.2	1824	603.6	2418	815.8	2939.2	987.2	-516.6	-141	1946.4	679.6	1686.8
	Actinobacteria	A.B.1	2919.4	1017.2	3089	996.8	168.6	49.6	1257.6	428.4	692.8	242.8	297.8	106.6	2329.6	662.8	622.8	198.8	-2089.2	-683.4	262.6	107	-781.4	-300.8	2086.2	682.4	2656.2	932.8	3077	1021.2	1974.8	668.6	1372.2	495.4	-2233.8	-735	228.2	89.8	1739.4	581.8	2259.2	758.4	2710.8	921.4	-512.2	-171.8	1890.8	673.4	1599.2
	Actinobacteria	A.B.1	2928.2	977	2933.4	967	186.2	55	1196.4	409.6	717.2	256.6	269.2	112.8	2575	841.4	796.8	259.4	-2178.6	-728.2	293.4	110.4	-695.2	-261	2128.2	727.6	2557.8	881.4	2936.8	988.4	1925.4	667.8	1359.8	481.2	-1855.4	-601.2	229.2	92.4	1754.6	599.4	2235	762.2	2562.6	891.4	-434.8	-167	1828.6	643.8	1660.6
	Actinobacteria	A.B.1	2887.6	990.4	2963.4	974.2	34.4	24.2	1247	419.6	775.8	266.2	284.2	121.4	2566.4	856.2	552.6	181.4	-2308.2	-733.2	265	115.2	-543.4	-198.8	2162.4	711.6	2640	898.8	3048.6	1033.8	2012.6	709.4	1377.6	493.2	-1994.4	-603.2	216.4	93.8	1795.2	608.6	2208.6	768.6	2600.4	885	-432.4	-168.2	1913.2	676.8	1671.2
	Actinobacteria	A.B.1	2941.2	1018	3088.8	1046.2	535.4	199.8	1274.2	454.6	649.8	234.2	254.2	102.6	2444.8	814	367.4	120.6	-2150.4	-691	272.6	114.2	-847	-318.2	2052.2	690.6	2315.2	811.2	2416.4	816.4	2132.6	763.4	1483	536.8	-2377.4	-763.2	201.2	74.8	1743	611.4	2169.6	723.6	2514.8	858.8	-478.6	-173.4	1810.6	626.4	1678.4
	Actinobacteria	A.B.1	2909.4	1020.4	2960.8	984.8	408.6	135.2	1199.4	414.4	640.2	220.4	278	123.2	2437.2	811	724	251.4	-1880.4	-646.8	204.4	94.4	-511	-199.6	1978.2	648.2	2231.4	814.6	2792.8	935.2	2094.8	723.6	1463	530.6	-1378.4	-503	245.6	101.6	1515.6	524.4	2293.6	792.8	2629.2	909	-430.6	-172.4	1889.4	660.4	1627.8
	Actinobacteria	A.B.1	2702.6	938.8	2751	930.6	718.6	266.8	896.2	271	635.2	216.8	287.6	116	2763	904.8	742	254.6	-2689	-861.8	222.8	101.4	-825.8	-299.6	2226.2	707.6	2150.6	737.6	2687	909	2185.2	765.8	1414.8	531.8	-877.6	-317.8	247.8	101.8	1706.2	583	2315.2	762.2	2978	1000.6	-599.6	-165.4	1988.8	682.4	1547.6
	Actinobacteria	A.B.1	2908.2	994.2	2929.4	961.4	390.4	111	1290	440.4	691	255.8	264.6	107.4	2645.2	884	552.6	216.8	-1964.4	-665	295.6	105.8	-647.8	-271.2	2192.2	706.2	2178	765.4	2659	905.2	2125.6	721.8	1450.2	539.4	-1165	-389.6	226	102	1788.4	616	2256.8	784.2	2667	941.6	-440.4	-144.2	1934	663.2	1686
	Actinobacteria	A.B.1	2823.4	981.6	2842.4	931.2	444.6	145.2	1275.4	443	690.4	253.4	281	121.4	2544.4	827.8	468	130.6	-2074.6	-720.2	293.8	117	-704.6	-249.6	2130	741.6	2179.2	771	2592	895	2179.6	742.8	1473	527.6	-1105.2	-388.2	234.6	106.4	1817.2	606.8	2209.6	770.4	2551.2	870	-336	-116.4	1968.2	671.2	1765.2
	Actinobacteria	A.B.1	2783.2	966.4	2851.2	938.2	468.6	133.8	1228	436.6	665.6	235.6	293.6	108.6	2545.4	838.4	536.8	182.2	-2045.8	-666.6	268.6	114	-700.4	-246	2138	721.6	2189.2	767.4	2676	927	2097.4	733.2	1423.6	496	-1568	-568.6	239.6	93.2	1762.2	620.8	2269.6	768.8	2566.6	911.6	-317.2	-109	1880.8	644.8	1585.6
	Actinobacteria	A.B.2	1697.2	630.8	2219.8	785.4	-809.2	-246.6	77.6	59.4	320.4	140	177.4	89.2	441.4	187.8	-822.6	-236.2	-3074.8	-975	283	144.2	-1010.2	-328.8	13	30.4	584.2	254	1063.4	392.2	231.2	106.8	334.8	152.2	-2120.2	-663.2	469.4	268	121	95.4	296.8	163	584.6	252.4	-518.4	-107.6	328.8	149.2	118.6
	Actinobacteria	A.B.2	1512.4	558	2076.8	702.6	-662.6	-188.6	108.4	72.2	279.4	134.8	159.4	88.2	488.6	209.2	-475.6	-132	-1950	-566.6	257.4	164.2	-814.4	-264.6	143	89.6	606.4	238.4	1033.6	382.4	306	124	327.6	163.6	-965.8	-354.8	252.4	129	228.8	119	546.2	208.8	852.6	316.2	-378.6	-77.6	404.6	197.2	111
	Actinobacteria	A.B.2	1549	588.4	2131.4	744.2	-619.6	-195	111.4	52.8	276	111.6	139.4	91.8	371.8	161.6	-459.8	-147.8	-2217	-713.8	217.2	116.8	-656.6	-185	57.4	69.2	591.8	254.6	1058	410.6	331.6	143	320.8	126.2	-1739	-600.8	125.2	74	127.8	89.4	402.8	168	699.2	268.8	-459.8	-133.2	258.4	115.8	89.4
	Actinobacteria	A.B.2	1564.6	562	2068.6	719.6	-754.2	-226	108	56.6	301	106	153.2	91	-113.2	-46	-193.8	-27.4	-1863.4	-592.6	97.8	63.4	-494	-172.8	87.4	40.6	583.6	256.4	987	399.6	253.6	103	228.4	133.4	-1397.8	-457	248.2	112.4	248.8	104.2	482.8	177.4	720.8	288.6	-243	1	94.2	63	24.8
	Actinobacteria	A.B.2	1512.8	552.8	2168.4	774.4	-794	-258.4	180	82.4	336	129.8	156.2	101	366	148.6	-487	-131.8	-1570.8	-557	175.8	114.2	-714.4	-232.4	23.4	28.8	595.2	259.2	1088.8	398.6	325.2	145.8	289.2	132	-1890.4	-609.4	203	103.2	112.4	96.4	417.8	172.6	658.2	259.8	-341.6	-78.8	334.6	145.6	110
	Actinobacteria	A.B.2	1432.2	536	1964.6	702.2	-515.4	-163.4	216	97.8	331.4	133.2	159.4	93.8	388.2	162.6	-470.8	-145.6	-1881.4	-572.2	199.4	120	-746.4	-233.2	57	44.6	528.8	228.8	963.2	376.8	458	217.2	315.6	161	-1556	-542.8	215.4	116.6	136	99	418.6	187	653.2	254.4	-349	-81.6	310.2	150.2	111.4
	Actinobacteria	A.B.2	1525.8	567.4	1964.2	698	-385.6	-121.6	250.8	91.6	421.8	167.2	196.2	108.8	346.2	131.6	-488.2	-140.8	-1656	-542.8	172.4	103.2	-666.2	-232.2	29.8	15	604.6	261.2	1027.8	380.4	520	199	420.2	178	-596.8	-189.8	300.4	138.8	183.4	91.8	408.2	170.2	668.8	270	-333.4	-71.8	314.2	140.4	105.2
	Actinobacteria	A.B.2	1333.8	471.2	1913.4	669.6	-88.8	5.4	269.8	123.6	425.6	195	213.8	102	430.8	181	-437.2	-118.4	-1919.2	-592.2	260.4	141.2	-662	-205.8	84.8	57.8	595.6	258.2	1050.6	388.2	590.2	238.4	444.2	191.8	-268.4	-122	306.8	141.4	158.4	116.4	485	188.2	766.4	301.8	-342	-74	353	172.6	131.6
	Actinobacteria	A.B.2	1380.4	499.2	1876	681.2	-331.8	-95.2	186	88.2	331.8	148.6	157.4	81.8	423.8	156.6	-460	-101.2	-2062.8	-639.8	168.8	94	-609.4	-210.2	106.6	50.6	472.4	218.2	968	373.4	418.4	156.2	383.2	170	-649.6	-206.2	246	126.6	177.6	97.6	451.2	190	707.2	298.2	-506.6	-168.4	318.2	142.2	114.4
	Actinobacteria	A.B.2	1357.4	506.4	1871.6	658.6	-237.2	-56.6	213.6	103.8	318.2	128.2	170.6	84.6	370.2	158.6	-432.4	-119.2	-1690.6	-523.4	202.2	92.4	-715.6	-212	55.6	41.6	512.8	217	975.6	371	460.8	189	369	170.4	-784	-250.8	249.6	130	199.8	100.4	456.6	180.2	644	242	-392	-103	309.8	136.4	86.4
	Actinobacteria	A.B.2	1373	526	1848.4	675	-328	-95.8	184.4	102	207.4	106.2	147	84.8	367.6	155.6	-454	-146.6	-1510.2	-477.4	148.8	83.4	-603.6	-212.4	91.8	54	463.8	209.6	907.6	367	465.4	177.2	386.8	171.2	-653.8	-244.8	250.8	121.4	218.6	92	448.6	183.2	620.2	247.2	-336.4	-82.4	328	158.6	97.8
	Actinobacteria	A.B.3	523.8	214	719.6	259.8	-689.8	-207.8	144.8	47.4	204.4	87.6	-62	-69.4	-636	-211	250.4	88.8	-1821.2	-603.6	110.2	59.4	-646	-246.4	41.8	15.2	191.6	87.2	219	93.8	129	59	90.2	42.6	-2101.2	-668.4	171.4	74	144	71	74	49	31.8	14.2	-828.2	-278.8	-27	0	2663.2
	Actinobacteria	A.B.3	524.8	210.6	754.6	271	-473.2	-149	239.6	76.6	196.2	80.8	147.2	76	-360.8	-117.4	508.2	183.6	-1251.4	-445.6	159.4	65.8	-297.4	-104.6	199	69.6	291.6	132.4	268	116.4	232.8	80.4	68.4	82.6	-2891.6	-931.2	163.2	62	303.8	116.6	290	114.4	264.6	101.2	-494.4	-164.8	141.2	91.2	177.8
	Actinobacteria	A.B.3	281.2	136.8	450	173.2	-705.6	-250	70.2	5.6	171.2	72.2	66.6	38.4	-532.2	-154.8	264.6	89.8	-1564.6	-512.4	102.6	48	-567.6	-202.6	83.6	38.2	90.8	49.2	36.2	31	95.4	60	25.4	14	-1556.4	-459.4	86.6	49.2	157.4	52.4	157.8	71	97.6	24.6	-681.8	-181.4	29	9.8	73.2
	Actinobacteria	A.B.3	407.2	173.6	452.8	180.4	-942	-301.4	22.8	19.2	28.8	0	64	50.2	-595	-213.8	321.8	114.4	-1903	-632.8	79.2	46.2	-716	-232.4	34.6	-4.2	142.8	75	135.4	62	76.8	31.8	3	11.2	-1721	-553.8	100.2	39.8	132.2	75.8	168.4	76.6	28.4	14.8	-853.8	-263.4	-57.6	10.4	36.6
	Actinobacteria	A.B.3	394	160.6	542.8	199	-800.2	-250.8	20.2	11.4	116.8	27	111.2	48.4	-457.2	-152.8	344.6	121	-1373	-451.4	112.6	45.8	-459.4	-147.8	132.6	64.4	139.8	79.8	151.4	55.2	54.6	32.8	40.4	23.2	-2087	-687.2	115.6	48.6	222.8	87.8	194.2	98.2	125	52.4	-603	-209.2	52.2	32.2	124
	Actinobacteria	A.B.3	443	189.4	612.8	230.8	-629.8	-219.2	135.2	42.2	162.4	52.6	81.6	46.4	-327.8	-93	500.2	184.4	-1221.2	-456.2	178.2	82.4	-386.6	-119.2	228.6	83.6	210.6	100	149	82.2	128.4	75	75.6	51.8	-1742	-581	154.2	66.4	285.6	121.8	267.4	114.2	232.2	91.2	-487.2	-138.8	139.2	53	244
	Actinobacteria	A.B.3	517.4	215.4	718.2	256.4	-826	-267.4	104.4	38.6	177	79.4	126.6	58.8	-629.4	-196	339.2	128.8	-1787.4	-618.4	97.4	47.8	-645.4	-218.6	90.2	38	220.2	102	238	98.6	203.2	80	80.4	45.6	-1747	-511.2	215	94.2	193.8	88.6	268.4	106.2	71.2	39	-901	-279.4	11.4	24.2	61.6
	Actinobacteria	A.B.3	523	227.2	594.6	224.4	-725.6	-268	247.8	120	170.4	73.4	114.2	53.4	-602.8	-175.6	219.6	89.6	-1626	-539.8	32.4	28	-678	-252.6	-56.2	-19.2	198.6	102	202.6	76.4	115.8	71.2	123.6	73.8	-1669.8	-602.6	224.6	101.2	7.2	42	28.6	24.6	-92.6	-20	-896.2	-277.4	-50.6	-5.6	-38.4
	Actinobacteria	A.B.3	421.4	173	520.4	198.4	-609.2	-218.6	135.2	34	79	42.6	97.8	55.6	-425.8	-142	414	149.4	-830.6	-276	157.2	62.6	-369	-121.6	182.4	74.4	125.6	74.4	76	52.4	90.6	29.2	114.6	74	-1238.4	-402.4	107.2	47.8	230.6	82.4	272	110.2	128.6	53.2	-591.2	-201.6	14.2	13.2	113.2
	Actinobacteria	A.B.3	582.6	242	724.4	258	-608.4	-208.2	170.4	49.2	212	93.4	149.8	65.8	-477.4	-196	264.2	102	-928.4	-265	97.8	60.2	-463.6	-130	119.2	35	225	113.8	222.8	107.8	247.4	95.6	136.4	63.8	-825.2	-253.8	268.2	112.8	150.2	71	159.8	62.2	27	26.2	-519.4	-188.8	60.8	26.8	106
	Actinobacteria	A.B.3	656	247.2	870.8	322.8	-428.8	-126.8	229.4	91.2	245.4	99	177	73.4	-636	-203.4	150	71	-1284.4	-444.2	68.4	47	-588.2	-199	25.8	17.4	317.4	132.8	361.4	155.8	324.2	110.2	184	82.4	-805	-273	283.2	114.4	93	45.8	87.8	43.2	-20.4	11	-717.4	-227.6	-19	4.8	42.4
	Bacteroidetes	B.B.1	2822.6	1087.6	2346.2	898	28.8	41.2	1640.8	630.6	2153.8	727.2	1276.4	564.8	3208.4	1116.4	523	222.4	-3971.2	-1287.2	794.4	305.6	305.2	87	3615.4	1243	1862.6	750	2079	789	1236.6	476.8	942.4	407.6	-1340.2	-466	872.6	359.2	1401.4	554.6	1680.6	617.4	2279.4	806.8	-314	-44	1223.4	478.6	1309.8
	Bacteroidetes	B.B.1	2521	982.8	2355	862.8	141.4	105.2	1597	602.2	2107.2	746.8	908.6	357.4	2759.2	949	545.4	219	-4471	-1468.6	722.2	303.6	575.2	133.4	3497.4	1173.6	1888.6	770.8	2117.2	806.8	1357.8	525.2	993.6	436	-397.8	-124.6	884.4	357.8	1422.4	536.8	1650	608.8	2466.8	845	-320.4	-83	1301.2	497.8	1371
	Bacteroidetes	B.B.1	2606.6	989	2255.6	830.6	272.4	116.6	1764	662.4	1960.6	690.4	840.6	354.8	2915	1022.6	369.6	168.8	-4034.6	-1340.8	745.2	327.6	321.4	67.8	3198.6	1102	1888.4	763.2	2118.8	835.4	1390.6	531.6	949	408.4	-1530.8	-522	816.2	345.2	1429.6	536.6	1518.6	584	2143.8	747.4	-258.6	-35.2	1223.4	459	1288
	Bacteroidetes	B.B.1	2598.4	986.6	2268.8	839.2	199.6	119.4	1687	632	1979.2	706.2	854.6	352.6	2873.8	981.2	752.4	300.8	-3201.8	-1040.6	800.4	308.2	359	143.2	3258.2	1084.2	1826	735.8	2046.6	785.8	1364	534.8	933	394.4	-1181.4	-425.8	810.2	332.8	1332.6	503	1523.2	585	2120.6	731.6	-188.8	-25.8	1147.4	426.6	1172
	Bacteroidetes	B.B.1	2600.8	983.8	2401.6	868.2	226.6	95.6	1820.4	674.2	2090.2	727	904.4	377.6	2907.4	988.2	496.2	211	-3731.2	-1190.4	755.8	321.4	496.2	141	3285.8	1113.6	1896.2	747.2	2168.2	814.8	1387.8	547.2	977.8	397.2	-1282.4	-434.8	880.4	340.4	1370.4	518	1480.6	563	2080.2	741.8	-153.8	-26.2	1154.2	474	1286
	Bacteroidetes	B.B.1	2609.4	1002.2	2484.6	927	413.6	176.2	1870	703.6	2012.8	696.8	838.8	327.6	2685	953	364.6	187.8	-4068.2	-1390.2	744	296.2	419	137.6	3098.2	1055.2	1859	746	2176	849.8	1462.6	563.6	1071.8	440	-1491.8	-449	912.8	374	1350.6	506.8	1402.8	552.8	2013.4	698.6	-210.4	18.2	1158.2	437.2	1251
	Bacteroidetes	B.B.1	2640.6	987.6	2389	881.2	352.2	146.6	1818	663.2	2029.4	724.8	842.4	343	2837	986.2	354.4	168.2	-4157	-1364	767	298.6	377	101.6	3222.8	1088.2	1872.6	776.8	2189	839.6	1431.2	591.6	1025.2	420.6	-671.6	-219.6	937.6	362.2	1290.2	502.6	1453	570	2030.8	708.8	-151.2	-2.8	1133	431.6	1201.2
	Bacteroidetes	B.B.1	2476.2	940.4	2346.6	886	669.6	251.6	1627	600.2	1941.6	672.4	845	352.8	3392.8	1120.4	625	257.4	-4899.2	-1592.8	707.2	304.6	588.8	157.2	3631	1191.6	1900.2	740.8	2202.6	851.4	1534.2	584.4	967	398	-239.2	-51.6	884.8	365.6	1389	532.8	1590.2	607.4	2379.2	831.2	-220.8	-48.6	1267.2	483.4	1250.4
	Bacteroidetes	B.B.1	2564.6	975.4	2286	890.6	428.4	182.4	1867.8	666.6	2011.2	731.2	841.4	348.2	2948.2	1015.8	540.4	263.8	-4027.4	-1307	784.4	318.6	450.6	165.8	3301	1123.8	1841.2	742.2	2072.8	798.4	1440.8	551.4	1089.8	453.6	-680.8	-214.2	929	381.2	1312.6	513.2	1505.6	565.2	2112.6	735	-195.6	-49.6	1170.4	461	1364.4
	Bacteroidetes	B.B.1	2497	939.2	2297.6	865.6	351.2	160.4	1830	657.8	1967.2	710.6	835.2	346.8	2617.8	922	386.4	175	-3836.6	-1221	582.6	249.4	271.2	68.4	2885	995.4	1808.8	738.8	2091	812.6	1427.2	552.2	1060.4	437.6	-547.2	-197	895.2	364.6	1474	546.8	1588.6	579	2050.8	709.8	-127.6	-0.8	1292.8	490.8	1391
	Bacteroidetes	B.B.1	2590.2	958.6	2357.6	879.2	331	142.6	1780.2	664.6	1970.8	707.4	832.4	350.6	2869.8	993.2	525.4	231.6	-3711.2	-1252.2	730	305	588	173	3277.8	1083.8	1814.8	733.8	2013.6	789.6	1444.8	546.2	994.6	411.4	-595.8	-204.2	917.2	372.4	1337	535.8	1520.2	565.6	2086	735.2	-21.8	47.2	1187.4	468.4	1225.8
	Bacteroidetes	B.B.2	2738.4	1181.4	2329.2	981.4	271.4	224.6	1527.6	658.4	5400.2	1842.2	1995	781	2934.6	1090.2	944.8	443.4	-3721.4	-1093	1573	654.8	322.4	172	3358.2	1248.2	2685.4	1118.8	2341.6	977.4	2639.6	1050.8	2731.6	1153.6	887.6	196.2	3428.8	1240.4	3692.6	1404.6	3411.8	1295.8	3577.8	1311.2	1241.6	470.8	2944.8	1163	3810.4
	Bacteroidetes	B.B.2	2392.2	1008.8	2279.2	949	171.6	175.4	1292.6	573	5211.8	1730.8	2200.4	920.6	2965.2	1140.8	763	378.8	-3790.2	-1162.6	1591	657.6	91.4	93.4	3372.4	1218.2	2564	1070	2423.8	1013.2	2759.2	1036.6	2655.2	1037.6	1310.6	380.2	3411.6	1227.2	3580.8	1349.8	3288	1254.8	3493.6	1286.8	1221.6	451.8	3039.4	1207.4	3916.6
	Bacteroidetes	B.B.2	2432.6	1000.6	2418.2	942.8	509.6	286.2	1564.2	659.2	5177.6	1717	1806	733.4	2762.2	1052.8	646.2	325.4	-3801	-1181.8	1526	626.8	-20.6	66.8	3173	1175.6	2552.8	1068.8	2396.8	1009.8	2757.6	1061.2	2692.8	1095.4	742	121.4	3203.2	1127.8	3194.6	1211.8	3057.4	1185.8	3119.8	1166	1027.6	409	2581.4	1026.6	3605.6
	Bacteroidetes	B.B.2	2395.4	987.6	2117	863.8	314	203	1511.6	639.2	5057	1676.6	1856.2	754.2	2687.4	1015.4	750	385.8	-2983	-897	1500.8	623.8	296.6	148.4	3154.6	1143.8	2504.2	1023.8	2329	959	2586.8	1014.4	2687	1106.4	789.6	193.8	3258.8	1151.2	3229.8	1235.6	3143.4	1167.2	3305.8	1260.4	1153	422	2776.8	1119.8	3620.8
	Bacteroidetes	B.B.2	2345.8	980.6	2323	915.8	512.4	232.2	1653.2	702.4	5211.8	1742.6	1899.6	743.2	2673.8	1002.8	541.2	303.6	-3782.6	-1171	1561.4	656.8	220.6	126.4	3133.6	1151.8	2590.8	1067.4	2326.4	985.2	2659	1035	2694.6	1125.6	887.4	209.2	3268	1179	3155	1202.2	2943.2	1135	3011.4	1143	1233.4	462	2613	1048.8	3502.4
	Bacteroidetes	B.B.2	2637.4	1120	2532.6	1002.2	647.4	339.4	1708	735	4850	1650.8	1737.4	702.8	2722	1038.6	575.4	311	-3875.8	-1183.4	1547.2	630.2	-10.6	84.4	3100.8	1153.6	3071	1224.2	3058.4	1209.2	3207.6	1232.6	3044	1264.2	789.2	162.4	3542.2	1271.4	3066.6	1158	2892	1155.4	2900.6	1098.8	1227	462	2620	1059.2	3401.4
	Bacteroidetes	B.B.2	2469.2	1019.2	2313.4	929.2	390.2	234.4	1635.4	693.4	5119.4	1706.2	1872.4	734.8	2645.6	987.8	563.2	300.6	-3528.2	-1067.2	1457	605.8	116.8	120	3119	1168.6	2727.4	1102.4	2471	1047.6	2772.2	1078.4	2882	1174.4	1570.8	404	3314	1210.8	3129.6	1180	2985.8	1134.4	2963.4	1110.4	1135.6	437.4	2584.6	1015	3470.6
	Bacteroidetes	B.B.2	2267.4	958.8	2062	859.2	221.4	188	1206.6	549.2	5121.8	1740.8	1954.4	781.4	2877	1073.4	638.2	346.2	-4508.2	-1351.4	1589	656.4	117.8	112.2	3364.4	1222.4	2483.4	1004.4	2288.2	951	2663.6	1021.8	2603	1062.6	1661.2	501.8	3407.8	1237.4	3478.2	1332.8	3331.4	1248	3546.6	1302	1177.4	481.8	2916.4	1126.8	3878.2
	Bacteroidetes	B.B.2	2516.2	1014.4	2204.2	891.4	311.2	235.2	1654.4	685.4	5071.2	1712.8	1930.4	764.8	2820.4	1051.4	589.2	296.4	-3735.4	-1111	1726.4	759	-5	44.4	3129.6	1153	2705.4	1108.6	2444.4	1022.8	2743.4	1073.2	2824.2	1154.2	1758.8	423.2	3232.4	1176.2	3203.2	1192.4	3030.2	1173	2987.8	1150.4	1386.4	552.6	2665.8	1059.4	3614.2
	Bacteroidetes	B.B.2	2396.8	1013.2	2285.2	947.2	556	316	1771.4	755.4	4766	1635.6	1798.6	727.8	2642.6	1010.8	442.2	263.2	-3774.2	-1146.4	1504.6	633.8	188.6	108.8	3181	1170	2901.4	1168.8	2891	1173	3165.6	1187.2	3025.4	1198	1756.6	482.2	3551	1254.8	3138.8	1205.8	2994.2	1151	2908.4	1139.2	1215.4	446	2678	1066.4	3516.4
	Bacteroidetes	B.B.2	2384.4	998	2376.4	940	483.8	259.2	1733.4	721.6	4774	1601	2351.8	1039.6	2747.4	1033.4	480	284.2	-3901.8	-1215.4	1560.6	638.4	-5	79.6	3200.6	1169.6	2929.2	1173.2	2815.8	1153.6	3122	1166.6	3047	1215.6	1608.4	413.4	3618.6	1286.2	3100.2	1197.8	1468.8	629.4	2785.8	1067.8	1160	447	2548	1024	3527
	Bacteroidetes	B.B.3	3080.8	1199.8	3443.6	1218.4	909.8	351	1752.2	660	2307.8	771	862.8	348.2	2989.4	1054.6	1529.4	567.8	-2444.6	-767.4	884.2	355.8	646.2	235.6	2696.8	931.8	1732	738.4	2246.2	898.6	1729.2	646.4	1296.4	556	-1447.8	-447.8	798.6	312.2	1492.2	574.8	1885	684.6	2128	754	-315.4	-82	1408.4	556.4	1214.6
	Bacteroidetes	B.B.3	2809.6	1049.6	3235.2	1147.4	923.2	355	1528.6	565.6	2295.8	762.4	862.2	368.6	2950.8	1037.8	1256.4	439.2	-2451.4	-785.2	808.8	324.8	570.2	170.2	2661	955.4	1574.8	678.4	2594.8	1048.8	1803.4	637	1298	546	-704.6	-197.4	838.8	323.2	1488	577.8	1795	674.6	2227	797.2	-308.6	-92.4	630.2	255	-123
	Bacteroidetes	B.B.3	2739.4	1037	3186	1144.4	1099.2	402	1744	636.4	2195.4	720.4	828.8	324.4	2640.6	924.4	1254.6	426.6	-2159.4	-673.8	702.2	292.8	450.2	166.8	2375.2	851.6	1570.2	675	2198.2	845	1773.8	666	1289.2	553.6	-1275	-450.6	729.6	284.8	1487.8	567	1817.2	670.4	2221.4	788.6	-320.4	-76	1370.4	526.8	1304.6
	Bacteroidetes	B.B.3	2714.6	1032.4	3103.8	1118.2	1058.8	371.8	1698.2	604.6	2147.6	735.2	801.8	326.8	2771.4	972.8	1291.8	469.6	-2017.2	-607.8	830.2	331.2	615.8	218.2	2523	896	1547	659.6	2130.4	833.2	1695.6	590.4	1243.4	534.6	-1143.2	-351.2	752.6	277.4	1421.2	555.4	1777	616.4	2123.4	734.8	-191.8	-77	1252.2	487	1179.2
	Bacteroidetes	B.B.3	3043.2	1247.8	3149	1130	979.6	368.8	1646.4	634	2236.4	759.6	824.8	338.6	2815.8	965.4	1216.8	438.8	-1999.4	-640.2	864	325.6	668.8	245	2636	919	1584.8	687	2148.2	823	1817.4	670.4	1236.4	528	-1343	-465.8	734.2	293.4	1463	561.6	1781.4	658.4	2131.6	730	-206	-19.8	1388.6	556.8	1280
	Bacteroidetes	B.B.3	2437	936.2	3101.4	1109	961	357.2	1390	498.6	1163.4	427	472	207	2841.6	994.8	1152.2	415	-2306.8	-745.4	849.4	338.4	543.8	183.2	2595.4	894	1348.8	565.4	2336.4	865.2	2050.8	716.6	1432	600	-1216	-405.4	1157.8	424.4	1426	557.6	1728.8	611.6	2064.2	746.2	-273.8	-74	1372.6	530.8	1284
	Bacteroidetes	B.B.3	4649.6	2135.8	3344.6	1188.2	1086	419.4	1805.6	662.6	2151.2	748	851.2	324.6	2706.2	962.6	1081.4	390.6	-2280.2	-770.6	828	326.6	565.4	176.8	2626.2	942.8	1653.6	699.4	2220.2	850.4	1893.4	699	1353	590.6	-430.6	-144.2	775.6	298.8	1427.8	551.6	1788.2	639	2172	762	-157.8	3.2	1330.2	524.2	1230
	Bacteroidetes	B.B.3	2301.8	880	2730.2	1006.6	1140.2	435.8	1249.6	456.6	1185.6	426.6	493.6	206.4	3143.2	1078.2	1331.6	463.4	-2596	-802.6	866.8	323.8	662	269	2943.8	1028.8	1635	699.8	2229.8	879.8	2136.8	777	1282.8	579.8	-291.2	-133.4	1103.6	395.8	1493.2	563.8	1875.4	694.6	2235.6	781.2	-219.6	-26.4	1504.6	574.6	1250.8
	Bacteroidetes	B.B.3	2825.8	1055.4	3399.8	1217	1199.2	412.6	1782.8	688	2113.2	732.2	892	344.8	2760.2	974.4	1249.6	427	-2247.8	-748.6	820.2	305.8	587.2	211.4	2652.8	995.4	1679	712.8	2230.6	865	1837.2	680.4	1354	597.6	-850.4	-250.8	824.8	322.2	1388.4	525.6	1778.6	656.2	2102.8	743.4	-268.2	-66.8	1299.2	526.2	1204.4
	Bacteroidetes	B.B.3	2836.2	1069	3307.8	1209.8	1220.4	438.4	1876.4	702.4	2203.6	773.6	924	358.2	2755.8	994.2	1166	385.6	-2414.2	-743	828.2	311.4	627.8	181.4	2570.6	922.6	1653.8	703.8	2132.2	840.6	1807	683	1415.2	630.8	-991	-345.2	744.2	232.6	1418.8	553	1782.8	638.4	2144.6	746.8	-271.2	-70.6	1371.4	552.2	1256
	Bacteroidetes	B.B.3	2831	1086.2	3388.8	1199.2	1117.2	401.8	1844.8	707.4	2190.6	761.4	885	349.4	2822.4	986.6	1163.8	413	-1878.2	-555	851.4	342.2	711.2	241	2660.6	937.6	1590.4	685.2	2101.4	833.4	1861.8	673.4	1374.2	594	-1074.8	-323	846	317.8	1468.2	588.4	1763.4	626.8	2080.8	736.2	-222.6	-56.8	1291	551.6	1260.8
	Bacteroidetes	B.B.4	2634.6	957.2	3245.4	1143	965.2	309.8	1319.2	458.8	1789.6	575	875.6	327.2	2023.8	679.8	1308.2	425	-1006.6	-331.6	871	285.2	646.4	231	2077.2	704.6	1631	624.2	1896	707	1194.6	432.4	880.6	308.6	-1134.2	-387.8	760.4	255.2	1245	458.2	1382.6	480.2	1616.2	535.6	-482	-157.6	1098.6	388.8	1161.2
	Bacteroidetes	B.B.4	2506.6	942.2	3021.2	1091.4	992.8	332.2	1174	398.2	1885	612.4	838.8	298	2426.8	818.4	1103.6	386	-1553.2	-520	820.2	287.4	667.8	242.4	2298.8	774.2	1597	643	1782.8	661	1289.4	454	849.2	320.4	-473.2	-152	758.2	269.6	1264.2	433.8	1441.4	472	1773.6	607.6	-462.4	-149	1105	387	1253.8
	Bacteroidetes	B.B.4	2402	879.8	2953.4	1042	1072.6	352.4	1276.6	438.4	1767	572.6	843.2	283.2	2160.2	720	1181.6	371.8	-902.6	-287.8	904.6	310	667.2	200.8	2038.6	698.4	1531.6	574	1828.6	661.4	1237.4	435.4	855.2	348.8	-1169.6	-397.6	740.4	257	1191	442	1315.6	457.6	1651.4	526.8	-539.6	-195.4	1036.2	391.6	1236.8
	Bacteroidetes	B.B.4	2484.6	932.6	2899.4	1027	993.6	341.4	1301	433	1794.6	570.6	853.2	279.8	2152.6	730.2	1216	424.8	-451.2	-150.2	943.4	318.2	696	216.6	1975	687	1491.6	557	1679.4	607.8	1226	421.6	852.2	300.4	-1134.6	-422	578.8	205.8	2016.2	868.6	1306.4	450.4	1599.2	520.8	-408.2	-130	1026.2	363	1159.6
	Bacteroidetes	B.B.4	2497.6	920.6	2959.4	1028.2	1143.6	366	1305.8	474	1781.2	590	820.4	280	2171.6	731	1171.2	448.2	-996	-359.2	913.8	327.8	606.8	211.8	2066.8	661	1565.4	579.4	1828.8	669.4	1262.8	417.8	838.6	339.6	-1097	-383.4	673	231	1209.8	407.2	1352.6	463.8	1726.4	567.8	-167.2	-50.8	1089.4	394.6	1281.2
	Bacteroidetes	B.B.4	2356.8	866	3060.4	1067	1224.2	437.8	1403.8	490	1735.4	579.2	827	296	2203.2	742	1261.2	429	-1275.2	-462	954.6	305	622.6	180	2224.8	726.4	1575.8	610	1900.8	705.8	1284.2	462.4	907.2	345.4	-1444.8	-457.2	716.8	252.6	1222.8	452.6	1456.6	528	1695.4	559.8	-271.2	-91.6	1089.2	408.2	1263.4
	Bacteroidetes	B.B.4	2377.8	877	3002.4	1068.6	1176.6	372.6	1438.2	493.6	1795	569.2	847.8	299.4	2204.4	744.8	1228.4	394.6	-1152.2	-377	906.8	314.6	679.4	204.6	2047.2	681.2	1576.2	601	1930.2	705.2	1342.2	473.8	904.6	348.2	-674	-288.4	751.8	265.4	1204.8	437.4	1323	483.8	1625.2	549.2	-195	-77.6	1056.6	371.8	1218.4
	Bacteroidetes	B.B.4	2138.2	806.8	2648.4	952.6	1350.4	434	1206.4	433.6	1636.8	556.6	824.2	301.6	2428.6	814.2	1341.4	427.4	-1260	-440.4	772.8	270.6	820.8	265	2398.6	800.8	1460.8	557	1723.2	613.4	1404.6	478.2	893.4	332.8	-630.4	-266	699.8	252.8	1330.4	456.6	1462.6	506.4	1830.4	606.4	-443.6	-140.8	1233.4	420.2	1147.4
	Bacteroidetes	B.B.4	2257.8	838	2951.2	1059.2	1010.2	304	1367.8	484.2	1756.2	558.4	858.8	310.4	2263	769.8	1210.8	421.2	-917.8	-336.2	912.2	305	707	249.2	2133.8	728.8	1477.2	560.6	1744.6	640.8	1272.6	474.4	899.6	324	-709.2	-227.6	765	264	1226.6	439.6	1395	485.6	1676.4	557.8	-366	-127.2	1084.2	373	1267
	Bacteroidetes	B.B.4	2259.2	850.4	2919.4	1001	1060.4	323.6	1318	464.4	1775	572.6	862.8	315.2	2129.8	719.8	1131.4	389.4	-1096.4	-367.8	883.8	315.6	609	173.4	1979.6	676.6	1483	599.2	1724	632.4	1323.2	468.6	898.6	342.8	-433.6	-178.8	788.6	275.4	1182.2	438.2	1314.2	466.4	1594.8	546.6	-263.4	-104.4	1037.8	361.4	1167.8
	Bacteroidetes	B.B.4	2321.6	854.8	2944.8	1047.8	1038.8	303.6	1351	475.4	1749.4	555.6	875.8	304.2	2190.6	726.6	1173.4	396.4	-1216.6	-448.6	805.4	272.2	734	213	1992.8	669	1505.4	574.8	1708.8	649.6	1306.6	452.6	906	329.2	-725.8	-258	813.8	284.4	1246.8	418.6	1357.4	470	1602	536.2	-345.8	-110.4	1060.6	392.8	1184.2
[truncated: 1 more columns]

## Sheet: Dataset 2
	Dataset 2. Data-set matrix of the fluorescence intensity generated by the chemical nose after the addition of gut-derived bacteria (OD600 = 0.04). The three columns at the right indicate whether the data in the corresponding row was used as training data (denoted by “–”) or test data (results of the verification are shown) in the holdout test.
			pH 7.0																								pH 5.0
	Analytes		-None		-hA		-Dap		-Gly3		-Pro		-Leu		-Nle		-Pyri		-Phe		-Suc		-Pht		-Pyr		-None		-hA		-Dap		-Gly3		-Pro		-Leu		-Nle		-Pyri		-Phe		-Suc		-Pht		-Pyr
	Phylum	Species	Ch1	Ch2	Ch1	Ch2	Ch1	Ch2	Ch1	Ch2	Ch1	Ch2	Ch1	Ch2	Ch1	Ch2	Ch1	Ch2	Ch1	Ch2	Ch1	Ch2	Ch1	Ch2	Ch1	Ch2	Ch1	Ch2	Ch1	Ch2	Ch1	Ch2	Ch1	Ch2	Ch1	Ch2	Ch1	Ch2	Ch1	Ch2	Ch1	Ch2	Ch1	Ch2	Ch1	Ch2	Ch1	Ch2	Ch1
	Firmicutes	F.A.	4743	1777.4	4791.2	1584	2939.2	1108.6	3364.2	1170.8	3435.6	1158.6	4672.2	1551.6	4259.8	1428	2766	994	8126.8	2635	945.4	412.6	1941	687	890.8	346.8	2002	703.2	3405.8	1157.2	1850.8	753.8	2123.8	747.2	2076.6	705.6	2899.6	1001.6	3111	761.3	2478.4	883.4	3441.4	960.2	2552.4	960.2	8927.8	2830.2	905.8
	Firmicutes	F.A.	3725.6	1292	4946.6	1736.2	2808.4	1057.4	3246.6	1137.2	3313.2	1127.4	4464.8	1491	4507.4	1523	2771	988.6	7772.6	2544.4	900.8	396.8	1913	683.6	913.2	359.8	1946.4	691.2	3395.6	1140.2	1904.2	749.2	2003.2	711.8	1961	680.8	2958.4	1015.6	2932.8	756.7	2354.2	850.8	3307.4	863.2	2337.8	863.2	9010	2847.8	914
	Firmicutes	F.A.	3561.8	1234.4	4633.6	1562	2811.8	1061.4	3162.8	1108.4	3195.8	1073	4334.4	1440.2	4500.4	1493.6	2877.2	1034.2	7481.2	2456.2	895.2	387	1860.6	684	864.8	353.2	1932.8	692.8	3352.2	1154.4	1801.8	721.8	2057.6	739	1898.6	666.6	2922.4	998.6	2925.4	729	2279.4	815.6	3326.8	845.6	2257	845.6	8456.8	2691.2	890
	Firmicutes	F.A.	3611.2	1269.6	4699.2	1573.4	2742.4	1020.2	3409.2	1196.4	3455.2	1197	4614	1560	4387.6	1497.4	3260.8	1167	8133.8	2725	978	418.4	1940.8	689.8	891.4	364.6	1878.4	678.4	3394.2	1157.6	1882.6	740.8	2320.8	838	2135	735.2	3054	1053.8	2904.4	748.2	2529	897.2	3550.8	966.4	2630.6	966.4	9163.6	2887.2	911.8
	Firmicutes	F.A.	3481.4	1220	4388.8	1484.4	2620.8	978.8	3184.4	1109.2	3482.6	1205	4447.6	1487	4179.2	1441.2	2994.8	1089.6	7767.8	2586.2	895.2	403.6	1825.2	673.8	843.8	342.4	1822.2	652.8	3172	1099.8	1734	689.8	2096.6	753.2	1967.2	677.8	2893.6	983.8	2841.6	696.7	2306	829.8	3249	904	2437.2	904	9128.2	2868.6	843.2
	Firmicutes	F.A.	3381.6	1186.6	4283	1459.4	2599.6	973.4	3173.4	1087.2	3181.6	1093.2	4419.8	1476.6	4183.4	1414.8	2994.4	1070.6	7768	2549.6	884	387.4	1791	645.2	819.8	330	1798.4	659.4	3146.2	1078.8	1732.8	681.4	2026	735.2	1908.8	663.6	2745.8	953.6	2749.4	688.2	2204	802.2	3160	926.2	2532.2	926.2	8701	2730.8	863.8
	Firmicutes	F.A.	3636	1271.2	4729.8	1580.8	2787.2	1046.2	3421.6	1205.8	3463.6	1162.4	4821.8	1617.2	4447.8	1528.8	3282	1157	8472.8	2774	970.6	427	1876.2	694.2	888.2	360.4	1938.6	695.4	3326.2	1127.2	1817.6	712	2224.2	794	2090.4	712.6	3167.2	1079.8	2931.6	719.1	2462.8	868.6	3582.2	1032.8	2839.4	1032.8	9331	2974	897.2
	Firmicutes	F.A.	3596.4	1254.6	4542.2	1542.4	2798.2	1046.2	3274.8	1160.6	3328.6	1124.8	4612.6	1528.6	4280	1454.6	3153	1127.8	7787	2520.6	954.6	417.8	1835.2	662.2	853.2	338	1932.4	675.2	3243.8	1105.2	1751.6	678.4	2163	783.4	2054.6	703.4	3099	1050.4	2855.2	685.2	2412.2	860.4	3404.8	1042	2848.4	1042	9079.8	2839	838.8
	Firmicutes	F.A.	3505.4	1227.2	4356.2	1479.8	2664.6	1006.8	3331.8	1150.2	3481.4	1168	4504.4	1499.4	4307.2	1462.8	3114.6	1119.2	7811.8	2539.6	949.8	408	1762	634.2	794.8	327.6	1853.8	666	3171.2	1091.6	1728.6	679.8	2227.6	798.4	2145.2	726.2	3116.2	1051.4	2773.4	686.6	2493.8	896	3359	1067.6	2941.8	1067.6	8761.8	2805.2	825
	Firmicutes	F.A.	3505	1233	4499	1522.6	2660.2	1011.4	3367.8	1189	3642.6	1235.2	4695.4	1593.8	4228	1432	3181	1139.6	7976.2	2595.6	929.4	409.2	1792.2	640.6	800	317	1854	654.6	3751.4	1365.4	1712.8	668	2212.2	794.4	2143.8	759.8	3126	1056.6	2731.4	674.7	2488.4	894.8	3315.6	1047.6	2872.6	1047.6	8507.2	2734.6	841.8
	Firmicutes	F.A.	3479.2	1239.8	4333.4	1467.2	2647.8	1006.6	3181.2	1116	3390.8	1133.4	4653.8	1565	4027.6	1363.2	2610.6	949.6	8182.6	2686.6	910.8	405	1735.6	626.6	780.8	315.8	1864	661.4	3132.6	1058.8	1683.4	660.4	2093.6	741.4	2206.8	815	2959.2	1021.2	2829.2	667	2346.2	845	3270.2	1019.4	2818.8	1019.4	8888.2	2850	793.6
	Firmicutes	F.B.	2546.6	874.6	2987.4	1012.2	1849.2	688.2	2599.4	888.6	2397	773.4	2545	834.8	4418.4	2326	1217.8	432	4605.2	1454.6	622.2	303.6	1308	463.2	523.8	222.4	1849	629.6	2191.4	737.4	1685.2	638.8	2089	723.2	1626.2	531.8	2812	930.4	2562	859.4	2186.4	742	2777.2	946	2514.8	904.8	8428.8	2669.2	562
	Firmicutes	F.B.	2575.2	886	2411.8	827.4	1749	647.2	2515.4	827.2	2219.4	737.2	2378.6	784.4	2031.4	686.8	1062.8	391.4	4753.4	1505.2	573	281.4	1152.2	426.6	503.2	214.6	1559.4	534.8	2107	707.4	1635.6	629.2	1964	696.2	1508.4	512	2699.2	894	2413.4	814	2068.6	712	2643	899	2307.2	853	8144.6	2594.6	513.2
	Firmicutes	F.B.	2280.6	796.4	2603.8	892.8	1769.4	678.8	2487.6	852	2148.6	721	2529.4	843.6	2091.8	697.4	1048	388.2	4187.8	1324.8	567.4	275.4	1119.6	426	499	220.4	1609.6	545	2092.4	707.8	1615	600	1949.4	693.8	1798.4	648.6	2281.4	756.4	2420.8	823.2	2091.6	733.6	2434.4	831	2238.4	838.8	8055.8	2571.2	468.8
	Firmicutes	F.B.	2316	801	2632.2	893.6	1717	650.2	2674	932.4	2587.2	869.4	2915.6	990.4	2170.8	745.6	1122.6	405.2	5212.6	1642.8	940.2	512.6	1155.2	434	499.2	216	1617.6	561.6	2206.4	731.4	1627	624	2138.2	749.8	1748.2	578	2503	836	2522	853.8	2316.2	811.8	2653.4	909.6	2638.6	950	9153.8	2840.8	497.2
	Firmicutes	F.B.	2587.4	907.6	2419	841.8	1564.4	617.4	2505.2	858	2220.8	727.8	2808.8	936.6	1962.4	650.8	1076.6	381.2	5224.2	1673	569.6	268.6	1069.6	416.4	490.6	206.4	1518.8	528.8	2026.4	681.4	1521.4	597.2	1970.4	692	1595.2	538.2	2383.8	795.6	2299.2	792	2211	782.4	2537.4	890.6	2492	895.8	8429.4	2659.2	482.4
	Firmicutes	F.B.	2115.4	736.4	2379	808.2	1619	620.6	2506.6	885	2198.2	727.2	2715.6	924.2	1911	661.8	1161.2	421.6	4657.6	1486.2	569.6	279.8	1074.6	413.8	475.8	205.2	1525.2	531.2	1962.8	662.2	1534.6	584.8	1917.2	673.4	1567.4	530.4	2339.2	768	2263	780.4	2145	768.6	2501.8	864.6	2457.8	903.4	8103.8	2568.6	453.6
	Firmicutes	F.B.	2391.4	821.4	2783.8	929.2	1685	640.6	2978.8	1077	2261.2	749.2	3072	1016.8	2074.6	700.2	1236.4	437.6	5345.4	1688.2	640.2	300.6	1121.4	425.4	501.2	215	1560.4	549.8	2127	709.8	1637.6	636.4	2208	764.2	1762.2	576.6	2557.6	849.6	2398.2	824.8	2386.4	846.2	2766.2	933	2832.8	1037	8729.4	2754.4	492.2
	Firmicutes	F.B.	2260.6	760	2763.8	944	1717	647	2653.4	914.2	2793.8	918.6	2910	969.8	1937.2	655.8	1142	416.8	5193.4	1659.4	637.2	303.8	1103.6	410.2	510.2	221.8	1502.8	510	2008.4	678.2	1537.4	600.6	2050.8	723.4	1748.4	569.4	2480	826.2	2333.4	802.4	2332.4	815	2738.8	949.2	2711.8	987.6	8435.6	2688	479.4
	Firmicutes	F.B.	2203.8	755.8	2382.2	804.8	1694.6	643.6	2599.4	882.2	2342.4	779.4	2751	906	1871	634	1183	447.8	4591.8	1475.2	627.6	293	1062.2	406.2	465.2	195.4	1518.2	530	1994	673	1518.6	575.2	2069.6	720.2	1671.6	558.6	2505.8	840.2	2318.8	782.8	2289.6	805.2	2609.6	893	2852	1028.2	8069.2	2591.2	445.6
	Firmicutes	F.B.	2108	720.2	2431.6	839.4	1732.6	654.8	2480.2	851.8	2230.4	737.4	2351.6	761	1915.4	651.4	1077	380.2	4443.6	1361	614.8	296	1041.8	399	486.6	214.8	1523.2	533.2	2026.4	699.4	1473	582	1957.6	673.8	1627.4	539.2	2973.2	1004	2191.8	764	2133.4	741.6	2780.2	937.6	2817.6	1018.6	8097.4	2567.8	463.6
	Firmicutes	F.B.	2129.2	743.8	2427.8	836.8	1521.6	588	3528.4	1328.4	2258	744.4	2402.8	798.2	2110	707.6	1062.2	388	4113	1281.2	609.2	296.8	1007	372.6	466.6	197.2	1240.2	427.2	1940.6	638.2	1373.2	554	1969	680.6	1550.8	535	2814.4	927.4	2036.4	706.4	2036.4	712.8	1534	533	2688	963.6	8593.2	2712.8	441.8
	Firmicutes	F.C.	4922.6	1659.8	5810.6	1948	3392.4	1255.4	4138.6	1409.6	4596.6	1511.2	5233.2	1712.2	5003.6	1708.4	3511.8	1250.8	8162.2	2658.2	1044	469.2	2398	840.8	1048.4	419	3706	1306	5359	1807.8	2688.8	1020.8	2722.4	956	2813	970.4	3983.8	1337.8	3849.6	1327.6	3407	1196.6	4168.2	1424.2	2789.6	1021.6	9107.6	2896.2	1438.8
	Firmicutes	F.C.	4800.2	1667	5500.6	1836.4	3293	1216.2	4133.2	1416.2	4326.8	1452.6	5123	1720	4781.2	1609.4	3324	1185.2	7797.4	2550	1021.2	446.6	2304.2	832.4	1017.2	407.2	3679.6	1275.2	5269.6	1758.2	2590.2	983.8	2706.6	972.8	2804	952.8	3884.2	1337.4	3688.4	1249.4	3230.8	1139.6	3991	1338.8	2679.6	983.6	9054.4	2850.8	1325.2
	Firmicutes	F.C.	4649.8	1612	5399	1813.4	3162.2	1171	3797	1314.8	4093	1391	5123.2	1720.2	4780.6	1599.2	2614.2	947	7843.8	2590	996	442.6	2235.4	797.6	969.2	396.2	3538.4	1257.2	5178	1751	2642	984.6	2685	987.2	2574.8	896.2	3719.8	1249.4	3757.6	1291.4	3146.8	1108.6	3875.6	1310.8	2540.6	953.6	8852.6	2775.4	1320.4
	Firmicutes	F.C.	4458	1570	5472.2	1838.6	3115.6	1163.6	4218.8	1453.8	4654.4	1581	5524.2	1871.8	4648.2	1583.8	2841	1031	8692.2	2818.6	1083	473.8	2171.2	770.2	950.8	381.2	3423.2	1207.2	5059.4	1707.2	2535.2	969	3038.6	1104.4	2747.4	958.8	3915.6	1325.6	3654.2	1250	3461.2	1214.6	4255.2	1481	2992.6	1088.8	9581.8	3042.2	1230.6
	Firmicutes	F.C.	4414.4	1547.8	5339.4	1808	2991	1116	3759	1307	4070	1383.2	5075.2	1683.6	4486.4	1525.6	2776.4	1012.6	7852.4	2537.6	961.4	416.6	2273.4	813.8	986.6	401	3579.6	1249.4	5000.8	1680.8	2524.8	951	2712.4	980.4	2649.8	931.2	3888.4	1322.8	3607.8	1269.6	3210.8	1155.4	4150.8	1414	2851.6	1036.8	9073.4	2879.4	1331
	Firmicutes	F.C.	4469.6	1538.6	5201.8	1761.2	3049.2	1158	4104.2	1421.8	4271	1417	5342.6	1742.4	4447.4	1493.6	2934	1043.6	8145.8	2663.8	992.2	432	2234.2	798.2	956	394.6	3523.8	1238.8	5006.2	1689.4	2478.8	943.8	2676.6	968.8	2645.6	909.4	3934.6	1348.2	3557	1252.4	3183.6	1131.2	4053.4	1395.8	2752.6	1012.8	8886.2	2834.2	1239.2
	Firmicutes	F.C.	4777.2	1660	5725.2	1921.4	3226.2	1176	4259.6	1524.6	4482.4	1511.2	5620	1849.4	4869.4	1666.8	2994	1061.4	9020.2	2924	1074.8	478	2263.8	803.6	938.8	399	3570.2	1262	5156.4	1738	2603.4	982.4	2740	974	2735	942.6	4072.4	1380.2	3626.2	1250.8	3450.8	1235.4	4370	1499	3129.8	1140.4	9362.4	2941.4	1289.8
	Firmicutes	F.C.	4529.2	1587.8	5431.8	1817	3097.4	1145	4247.4	1464.2	4449.4	1485.6	5505.4	1807.2	4706.2	1611	3269	1155.6	8395.8	2709	1066.6	462.8	2237.2	801	992	401.6	3540.4	1241.8	5048.6	1702.2	2494.6	947.8	2705.4	975	2807.4	975	3946.6	1348.6	3573.6	1234.2	3444	1213.2	4378.8	1493.6	3095.4	1125.2	9065.6	2875.6	1212.8
	Firmicutes	F.C.	4527.4	1562.2	5259	1782.8	3053.2	1123.4	3953.4	1362.6	4160.6	1390.2	5095.6	1692.6	4598.4	1557.2	2644.2	953.8	8333	2700.2	965.6	439.2	2133	749.4	949.8	382.8	3499.6	1219.8	4933.2	1679	2459.2	921	2634.2	952.4	2625.2	917.4	3874.4	1313	3545.6	1220.8	3297.4	1178	4191.8	1405.2	3033.2	1095	8761	2755.6	1280
	Firmicutes	F.C.	4542.6	1572.6	5222.8	1756.2	3105.2	1151	4102.6	1406.4	4512.6	1486.2	5177.6	1708.2	4580.8	1555.2	3511.2	1249.4	8184.4	2689.2	1019	451	2199.8	771.6	919	364.6	3422.2	1227.6	4974.8	1692.4	2480.8	943.4	2569.8	926	2651	919.8	3883.4	1322	3445.4	1185.2	3237.6	1134.2	3999.2	1381.4	3054.8	1092.6	8621.4	2733	1272.4
	Firmicutes	F.C.	4499	1552.2	5299.2	1787.6	3045	1134.6	4240	1469	4499	1509.6	5202.6	1697.2	4482.8	1506.2	3384.6	1228.8	8144.6	2640.6	1064.4	473.6	2225.8	779.2	910.6	380.8	3477.2	1224	4872.8	1656	2456.2	913.2	2553.8	932.4	2720.4	939.8	4061	1392.6	3412.2	1175.4	3284	1145.6	4099.8	1396	3021.8	1099.8	8671.6	2742.2	1240.4
	Firmicutes	F.E.	3227.4	1133.6	4533.6	1532.8	2302.4	885.4	2540	899.6	2551	870.6	4256.8	1415	3838	1315.6	3352.4	1189.8	9063.2	2970.6	1004	428.4	2114.2	764.6	953	379	1720	606.8	2838.4	976.2	1396.4	569.8	1467.6	531.4	1516	531.2	2177	746.6	2281	793.2	1849.6	665.4	2480.8	852	2622	964.4	8902.2	2833	762.2
	Firmicutes	F.E.	3195	1111.8	4374.4	1494.8	2274.6	852	2494.2	870.6	2464	845.4	4249.8	1400.4	3816	1322.4	3199.4	1124.8	8789.6	2878.8	937.2	406	2123.6	742.6	959.2	372	1652.6	611.2	2673.6	920.2	1386	555.6	1425.2	529.6	1450.6	515.6	2146.8	741.4	2180	755.8	1765.2	643.2	2383.6	823.6	2482	921.6	9291.4	2953.6	774.6
	Firmicutes	F.E.	3078.2	1053.2	4340.6	1456.6	2251.8	844.8	2346.8	828.6	2505.2	856.8	4853.6	1874.8	3816	1294.2	2867.2	1028.6	8579.8	2813.2	990	413.2	2071.6	736.6	940	371	1618.2	581.6	2764	955.6	1366.2	554	1444	544	1464.2	515.6	2158.8	729.4	2139.4	750.2	1728.2	635.2	2347	820	2465.8	919.2	8790.8	2756.4	743.2
	Firmicutes	F.E.	3066.8	1060.4	4315.6	1446.8	2188.8	832.2	2520.2	904.4	2634	892.4	4259.6	1437.6	3640.2	1258.2	3216	1158.8	9305.2	3045.8	1016.6	444.2	2038.6	729.4	946.6	374.2	1596.8	574.8	2738.4	923.4	1362.2	553.2	1543.8	569.8	1551	559.4	2220	773.6	2137.4	754.4	1888	692.2	2536.8	879	2783.4	1045.2	9470.4	2976.2	776.4
	Firmicutes	F.E.	2998.6	1040.6	4246	1446.6	2089.2	794.6	2382	849	2519.8	880	4070.6	1361.2	3560	1233	3337.2	1185.2	8712	2851.6	977.6	418	2027	716.4	924.4	371.4	1657.6	587.2	2622.2	903	1347.8	542	1416.4	538.4	1464.6	524.4	2161	745.4	2071.4	732.4	1782.8	660.4	2356.8	835	2617	972.2	9069.6	2871	752.8
	Firmicutes	F.E.	2939.4	1025.4	4251.8	1421	2155.4	815.6	2415	860.6	2503.2	860.2	4084.2	1384.8	3480	1213	2878.6	1025	8690.6	2846.2	972.2	424.8	1968.4	707.2	899.4	352.2	1601.2	592.2	2568.2	886.6	1288.4	531.8	1411	530	1429.2	526.4	2176.6	760.4	2057.6	705.4	1736	646.4	2390.2	842	2634.4	980	8693.4	2773.2	729.6
	Firmicutes	F.E.	3163.4	1096.6	4463.2	1509	2271.6	846.8	2653.8	945.6	2743.4	937.2	4517	1506.8	3926.6	1334.2	3545.4	1234.6	9619.6	3101	1095.6	456.8	2081.2	735.8	950.6	367.6	1618.4	588.2	2677.4	921.4	1402.4	568.2	1596	596.2	1550.6	554.6	2338.2	792	2216.4	777.8	1897.6	677.2	2607.4	907.8	3074.6	1114.2	9327.4	2912.8	739.4
	Firmicutes	F.E.	3051.4	1064.4	4296.2	1442.8	2180.6	828.2	2595	927.4	2598.2	902.8	4248	1414.4	3700.2	1247.6	3323.4	1185.6	8536.4	2779.2	1034	445	2026.8	717	905.4	363	1650.2	586.8	2612.6	910	1344	545.8	1492	549	1516	543.6	2209.8	756.6	2131	753.4	1848.2	670	2437	855.2	2958.6	1094.4	9200.8	2905.6	723.8
	Firmicutes	F.E.	3009.2	1028.8	4208.8	1418.8	2309	920	2504	887.8	2525.2	877.6	4180	1424.6	3743.4	1276.2	3179.6	1127.4	9119.6	2987.4	1036.4	464.4	1979.2	716.8	876.8	327.2	1632.8	594	2705.8	936.4	1292.6	529.2	1503.8	561	1488.2	514.6	2183	776	2062.8	728.6	1878.6	699.8	2410.6	842.6	2982.6	1095	8790.2	2765.6	706.6
	Firmicutes	F.E.	3073	1084.8	4310	1441.4	2152.6	814.8	2527.8	913	2566.2	876.4	4487.2	1498.4	3620.8	1232.6	3393.8	1224.2	9110	2960	979.8	431.8	1927	690	893	352.2	1525.6	566.6	2614.4	910	1297.8	530.6	1403.2	519.6	1432	519.6	2116.4	746	2095	718.8	1749.4	633.6	2403.8	837	2939.6	1058.2	8597.4	2720.8	700.8
	Firmicutes	F.E.	2879.8	1006.6	4048.8	1398	2200.8	856	2541.8	892.2	2497.2	874.4	4227.2	1424.2	3507.8	1196.2	3229.2	1112.6	8821.4	2896.2	997.4	429.8	1950.2	693.4	1079.6	447.8	1692.8	621.4	2692.6	930.8	1301	531.6	1422.4	519.2	1466	521.8	2200.6	745.2	2134	806.4	1736.2	622.2	2437.8	849.6	2891.8	1049.8	9129.6	2886.2	701
	Firmicutes	F.R.	4558.8	1725.8	6122	2247.6	3164.4	1331	4016	1555	4557.8	1683.2	5265	1831.4	5065.4	1873.6	3988.6	1527.2	9156.8	3096.6	1098.8	602.4	2072.8	922.2	862.8	498.4	2918.2	1258.4	5405.2	2087.8	2431.6	1105	2693.4	1116.4	3149	1268	4203.4	1617.6	3835.8	1498	3516	1446.2	4523.8	1702	2704.2	1173	9247.6	3098.6	872.8
	Firmicutes	F.R.	4452.4	1705.2	5860.8	2170.4	3115.8	1301	3804.8	1480	4363.8	1623.8	5804.6	2050.8	4985.2	1819.2	3785.8	1504.2	9030.2	3116.8	1030.8	584	2165.2	934.8	826	502.4	2953.8	1257.8	5414.6	2061.6	2326.8	1066.2	2562.2	1078.4	3063.6	1235	4195.4	1598.4	3836.2	1508.4	3327.4	1344.6	4371.2	1673.6	2604	1131	9295.8	3094.4	846
	Firmicutes	F.R.	4229	1623.6	5853.8	2176.4	3100.2	1283.6	3875	1514	4410.4	1641.4	5450.2	1945.8	5002	1830.6	3963.2	1564.2	8443.6	2908.2	1016	584.4	1926.4	834.6	784	465.2	2719	1143.2	5010.4	1900.2	2157.8	1016.6	2559.2	1099.6	3197.8	1294.8	4249.6	1597.6	3760	1462.2	3313.4	1347.2	4220	1640.2	2701	1160	8955.2	3013.4	773.2
	Firmicutes	F.R.	4287.2	1682.8	5895.8	2209.2	3000.8	1289.8	4074.2	1569.8	4642.2	1725.4	5488.6	1981.8	4937.6	1839.2	4349.2	1696.4	9235.8	3162.8	1054.4	605.8	2102.6	911.4	833.8	499.4	2885.6	1236	3249	1349.6	2330	1073.4	2702.4	1135.8	3354	1317.8	4356.4	1662	3842.4	1487.6	3520	1426.6	4564.4	1745	2879	1219.4	9778.8	3226.4	874.6
	Firmicutes	F.R.	4253.8	1635.2	5718	2101	2888	1247.8	3911.4	1525.6	4508.4	1708.8	5546.2	2000.8	4607.4	1725	4051.4	1575.4	8829.2	3025.4	1002	584.6	2011	910.4	828.8	496.4	2726.6	1184.4	5392.6	2073.4	2281	1044.8	2591.4	1079	3197.2	1272	4258.8	1634.8	3734.6	1470	3340.4	1369.2	4404.4	1729.2	2778.4	1187.6	9472.6	3168.4	811.2
	Firmicutes	F.R.	4102.6	1595.4	5453.6	2051.6	2939	1259	3876.2	1529.4	4423.2	1656.6	5486.4	1965.4	4765.6	1740.4	3984.6	1574.6	8761.8	3052.2	1005	578.2	1955	855.6	753.8	461.4	2661.6	1128.6	5044	1934.8	2253	1027.4	2421	1059.6	3161.6	1270	4266	1624.2	3640.6	1430	3215.6	1341.6	4318.6	1701.4	2634	1162	4966	1748.6	807
	Firmicutes	F.R.	4206.8	1632.4	5864.6	2166	3076.4	1293.4	4234.4	1652.6	4653	1718	6042.2	2149.2	5031.8	1836.8	4442.6	1726.2	9619.4	3292.2	1115.2	638.4	1939.4	848.6	775.2	452.8	2648.6	1118	5249.8	2006	2280	1038.6	2775	1174.6	3374.4	1374.6	4546	1743	3725.2	1458.8	3550.8	1433	4814.4	1831	3021.4	1281	9708.4	3251	760.2
	Firmicutes	F.R.	4155.2	1610.4	5735.4	2093.8	3018.4	1275.6	3954.2	1539	4616.6	1708.6	5398	1920.4	4845.4	1810.4	4399.2	1687.6	9198.2	3177.8	1046	569.6	1917.2	852	770.6	453.6	2617.4	1136.4	5132.4	1959.4	2161.2	1000.8	2212	926.4	3250	1285	4261.8	1643.6	3673.8	1461.8	3412.8	1386.6	4559.2	1750.8	3065.4	1266	9835	3380.4	737.8
	Firmicutes	F.R.	4085	1587.2	5619	2099.8	2947	1260.4	4079.2	1596.8	4678.8	1718	5673.4	2002.2	4889.6	1805.6	4160.4	1635.8	8892.2	3061	1088.4	615.6	1869.8	825.4	793	468.6	2646.8	1124	5105	1967.2	2251.4	1030	2663.4	1106.8	3315.2	1314.8	4447.8	1704.2	3632.4	1444.2	3464.6	1419	4547.8	1723.8	3048.4	1276.4	9382.4	3148.6	768.4
	Firmicutes	F.R.	4245.8	1628.4	5609	2057	2973.2	1254.4	3822	1514.2	4530.4	1676.2	5812.2	2075.2	4694	1748.4	4042.4	1592	9071.8	3111.8	1063.8	620.2	1949.2	865.2	796.2	481	2760	1167.4	5083.4	1965.6	2230.8	1023.6	2528.8	1080.6	3191.6	1283.8	4239.2	1608.6	3574.2	1414.2	3344.6	1385	4427	1697	3046.8	1238.8	8859.8	2947.4	811.6
	Firmicutes	F.R.	3802.4	1502.8	5317.4	1951.8	2708.2	1161.8	3891	1502.8	4578	1659.8	5746	2060.6	4656	1732.4	3968	1558.6	9242.6	3160.4	1047.6	587.2	1828.8	810.8	783.2	469.4	2754.2	1166	5108.2	1941.8	2094.2	978.8	2469.4	1039.8	3155.4	1264.8	4223.2	1605.6	3528.8	1396	3332	1328.6	4424.2	1717	3036.2	1261	9156	3074.4	722.4
	Firmicutes	F.L.1	1617.4	615.8	3080.2	1129.8	1964.2	797.8	2133.2	772.4	1939.4	689	4283.2	1455.2	4200	1456	3472.8	1239	9116	2971	807	372.2	2058.6	820	783	339.6	1168.6	446	2129.6	779.8	1228.2	520	1547.8	584.2	1388.8	512.2	1962.2	706.4	1990.2	737.8	1702.4	647	2202.4	803	2510.4	943	9380	3016.8	741.2
	Firmicutes	F.L.1	1969.4	748	3558.4	1285.4	2043.8	819.6	2286	836.2	2114.8	762	4250	1435	4288	1476	3384.4	1202.4	8773.4	2845.4	887	388.6	1786.2	664.4	2312	1062.6	1291.8	504.6	2310	889.8	1280.6	549.6	1634.8	603.8	1637.4	636.8	2139	759.2	2181.6	794.8	1771	679.4	2328.2	832.2	2333.6	880.8	9636.8	3084.6	784
	Firmicutes	F.L.1	1636.8	649.4	3065.8	1105.6	2060.8	866	2168.8	801	1987.4	707	4242.2	1445.8	4065.2	1415.6	3365.4	1222.4	8211.6	2731.4	885.4	400.4	1509.2	564.8	742.2	312.2	1060.6	411.6	2128.4	788	1142.8	500	1541.8	578.2	1446.2	531.2	1808.6	647.4	1901.8	696.4	1707	636	2282.6	843	2531.2	928.2	8855.4	2857.2	607.8
	Firmicutes	F.L.1	1539.6	590.2	2718	995.6	1860	761.6	2414	898.4	2260.4	813.8	4540	1549.2	4083.8	1391.2	3633.6	1295	9305.8	3081.4	980.8	438.6	1547	584.2	740.4	327.8	857.8	336.8	1577.4	576.2	1122.2	495.6	1678.4	632.4	1629	585.8	2248.4	800	1828.6	674.6	1915.4	713	2556	925.4	2852.8	1032.6	9757.2	3098	630
	Firmicutes	F.L.1	1855	707.4	3265.2	1200.6	1808.2	757.8	2287.8	825.4	2136.6	767.8	6632.4	2736.2	3948.8	1367.4	3393	1234.6	8588.4	2870.6	927.8	408.2	1645.6	605	817.6	342.8	1218.4	487.4	2237	835.8	1224	506.6	1449.4	561.4	1518.6	578.2	2164.6	777.2	2009.6	740.6	1782.4	677	2441.8	896.2	2691.6	969	9566.6	3013	814.2
	Firmicutes	F.L.1	1699.8	652.2	3065.6	1122.6	1931.8	775.6	1998.8	744.8	1836.6	667.2	4149.6	1398.2	3990.4	1377.6	3265.8	1183.2	8529	2830.6	797.8	356.8	1567.4	579.6	796.2	322.8	1171.8	459.2	2199.4	817	1178.4	518.6	1388.6	540.2	1352	495.8	1897.2	673.2	2048.6	771	1569.6	607	2147.2	781	2611.6	969.4	8927.4	2856.4	734.6
	Firmicutes	F.L.1	2064.2	776.6	3542.6	1278.8	2050.6	834.6	2408.4	887	2203.8	808.8	4461.2	1521.6	4299.4	1508.8	3743.4	1340	9642.4	3162.8	988	480.6	1788.4	647.2	888.6	367.8	1256	494.8	2299.2	848.2	1274.8	537.4	1699.4	637.4	1581.8	561.2	2244.8	797.6	2061.2	740	1931.6	725.2	2574	918.6	2973	1094	9731.4	3052	779.4
	Firmicutes	F.L.1	1891	718.4	3409.4	1257.8	1945.8	771.2	2063.6	776	1877.8	686.2	4242.4	1438.6	4129.8	1425.8	3476.8	1265.4	8965.2	2965.4	822.8	376.8	3074.2	1141	855	347.2	1227.4	492.6	2176.4	804.4	1211.6	519.6	1480.8	564.4	1441.4	529.8	1934.4	704.8	2006.4	749.6	1694.2	643	2199.6	808.8	2897.6	1080	9397	3005.6	793.8
	Firmicutes	F.L.1	1853.8	705.6	3335.2	1206	2076.8	816.4	2203.4	817.8	1952.6	690.4	4303.4	1458.2	4123	1445.2	3430.6	1257	9005.4	2969	881.6	404	1611	589.2	806.4	335.6	1205	479	2210.2	817	1288.6	548	1526	573	1452.2	532.4	2069.4	735.2	2016.2	735.6	1780.6	670	2327.2	847.4	2853.4	1025.8	9227.8	2948.2	744.8
	Firmicutes	F.L.1	1767	678.8	3345.4	1243.8	1961	789.8	2283.2	827.8	2077.6	744.4	4405.8	1487.6	4047.8	1384.2	3496.4	1263.2	9072.2	2965.2	849.8	376.8	1620.4	596.4	833.4	350.2	1167.4	459.2	2162.8	799	1207.2	498	1574.6	591.8	1508.6	549.8	2113.6	752.6	1963.8	705.4	1810.6	692	2405.4	869.8	2741.6	1016.2	9116.2	2919.8	699.6
	Firmicutes	F.L.1	1543	601.6	2790.6	1016.6	1756.4	709	2225.4	816.8	2101	747.4	4272.8	1438.8	3789.6	1318.4	3380.8	1219.4	9345.6	3065.8	891.8	387.4	1451.4	547.8	693.2	284.2	1055	410.2	2017.8	734	1132.6	472.6	1571.4	601.4	1483.6	540.8	2107.2	760.4	1748.2	641	1752.2	670.6	2394.6	870.2	2728	1013.2	9312.4	2970.2	632.4
	Firmicutes	F.L.2	4554	1623.8	5109.4	1787	2557.4	993.2	2821	1049	3950.6	1367.2	3945.8	1369.2	4453	1556.4	3248.8	1190.6	7282.4	2491.2	1188.2	594.4	1571.6	609.6	621	270.6	2138	797	3380.2	1216.8	1666.6	676	2153	810	2937	1027.2	2085	760.8	2797.8	676	2370	884.4	3890.2	918.6	2364.8	918.6	8766.2	2867	744.4
	Firmicutes	F.L.2	4435.6	1578.8	5084.6	1756	2421.6	964	3066.4	1115.8	3915	1358.8	3965	1374.6	3965.6	1405.4	3107.8	1160.6	7029.8	2406.8	812.8	380.8	1456.4	562.4	590.6	267.6	2598.8	953.2	3716.6	1297.8	1793.2	727.2	2056.2	783.8	3009	1065	2170.6	785	3158.4	727.2	2507.4	927.8	3622.2	887.4	2290	887.4	8637.4	2780	810
	Firmicutes	F.L.2	4391	1544.8	4978.2	1705.8	2413.6	956.6	2767	995.4	3813	1310.6	3749	1284.6	3985.2	1405.2	2983.8	1126.2	6965	2386.8	758.2	360.2	1480.4	555.6	583.2	260.4	2470.2	902	3531.4	1248.8	1653.8	673.4	2042.2	754.6	2859	995.6	1985.2	722.4	3103.6	673.4	2265.4	843.6	3538.4	854.4	2233.2	854.4	8455.2	2760.6	791.6
	Firmicutes	F.L.2	4422.4	1535.8	4926.2	1696.2	2482.4	958.4	2582.8	938.6	3728	1302.6	3668	1282.8	4034.4	1404.2	2895	1079.2	6525	2207.2	729.4	360	1516.4	568	602.4	270.6	2282.8	832.2	3441.8	1209	1689.6	677.6	2020.8	747.4	2719	971.6	1865.6	690.2	2994.6	677.6	2177.8	798.4	3447.2	826.6	2184.2	826.6	7963.8	2558.4	745.8
	Firmicutes	F.L.2	4262	1516.6	4845.2	1651	2356.2	933.8	2512.6	917.2	3725.8	1271	3608.2	1256.2	4013	1401	2910	1070.4	6963	2347.4	754.4	358.6	1383	528.6	567	262.4	2326.4	930.2	3214.8	1144.8	1519.8	618.2	1948	707.6	2873.4	1018.4	1941	703.6	2798.8	618.2	2241.2	830.8	3296.2	861.6	2275.2	861.6	8093.8	2678	663
	Firmicutes	F.L.2	4091.8	1460.4	4645.4	1604	2237.6	890.6	2567.8	949.2	3882.6	1327.8	3634.6	1258.6	4090.6	1435.8	3281.4	1329.4	6820.8	2323.8	765.8	369.6	1385.8	543.2	566.8	264.2	2018.4	748.8	2849	1013.2	1563.6	634	1930	726.8	2830.2	984.8	1912.8	694.6	2852	634	2242.2	830	3309.6	831.6	2134	831.6	8359.6	2731.2	680.2
	Firmicutes	F.L.2	3959	1421.2	4503.4	1576.4	2247.2	918	2559	924.8	3722.6	1296	3632.2	1257.8	4099.4	1453.2	2831.8	1041.2	6819.4	2307.6	734.4	354.6	1357.2	531.4	576.8	266.2	1875.6	697.4	2737.6	998.4	1551.6	628.8	1879.2	696.8	2733.4	949	1874	688.2	2795.2	628.8	2177.2	818.8	3243.6	827.4	2173.2	827.4	7913.6	2579.8	623.4
	Firmicutes	F.L.2	3486	1258	3492	1225.6	2270.4	908.4	2882.6	1054.8	4061.2	1389.4	4086.2	1424.6	3902.6	1400.6	3126.8	1146.4	7328.4	2515.2	975.8	447.2	1456.6	570.8	582.8	264.2	2027.4	737	2550.4	937.2	1773	717.4	2134.2	780.8	2938.6	1036.4	2041.4	751	2800.2	717.4	2409.2	886.2	3617.2	865.4	2287	865.4	8073.8	2613.6	712.8
	Firmicutes	F.L.2	3996.2	1424.2	4376	1551.6	2288.2	918.8	2593	940.6	3859.8	1321.4	3752.2	1305.2	4037	1405.8	2961.8	1072.4	7144.8	2404.6	742.8	346.6	1367.2	537	556	260.4	2146.4	773.4	2898.4	1060.8	1579.6	638.6	1930.8	721	2880.4	999.4	1912	683.6	2768.4	638.6	2220.6	827.2	3286.2	829.6	2170.2	829.6	8055.8	2641.6	622.4
	Firmicutes	F.L.2	4000.8	1403.6	4390	1520.2	2292.2	901	2560.8	935.2	3836	1301.2	3603.8	1254	4040.6	1406.8	2934.4	1072.6	6697.2	2283	767.4	368.6	1440.2	551.4	596.2	263.2	2075.6	772.4	2888.4	1030.8	1626.6	666.6	1903.2	713	2730.4	967.4	1856	677	2879	666.6	2232.6	827.4	3287.4	848	2209.6	848	8065.8	2666.4	718.6
	Firmicutes	F.L.2	3860.2	1380.6	4200.6	1462.4	2269.4	915.8	2751	984.6	3831.4	1330.2	3795.4	1306.8	4070.4	1420	2957	1100.2	7078	2387.6	737.8	351.6	1388	528.8	558.8	261.6	1853.2	687.4	2615.6	949	1548.8	627.8	1925	715.6	2975.6	1088.2	1947.6	703.4	2656.2	627.8	2337.8	862.8	3296.8	831.2	2167	831.2	8157.6	2649.2	658
	Proteobacteia	P.E.1	2907.2	1124.4	3816.6	1396.4	2425.4	989.4	2963.2	1115.8	3511.6	1264.6	4806	1647	4446	1593.4	3788	1385	7656.8	2590	1085	499.8	2408.8	878.2	1194.4	506.2	2118.4	829.2	3207.2	1188.6	2394.6	1022	2217.8	849.2	2172	799.6	3312.8	1186.4	3457.6	1260.6	2709.4	1019.8	3570.6	1284.6	2482.4	941	9319	2964.2	1795.6
	Proteobacteia	P.E.1	2603	1012	3503.4	1284.6	2352.6	995.2	2932.4	1095.2	3685.2	1338.6	4854.4	1751.6	4311.2	1543.2	3669.8	1375.4	7350.6	2510.4	1130.2	511.8	2290.2	838.6	1036	443.8	1816.6	702.2	2888.6	1048.4	1874.4	786.8	2179	823	2250	837.6	3229.2	1152.2	3227.6	1211.2	2456	920.6	3507.4	1271	2352.2	902.2	9598.8	3061.8	1294
	Proteobacteia	P.E.1	2636.6	1013	3507.4	1301.6	2337	973	2850.8	1080.4	3250.8	1195.2	4387.4	1532.8	4250.2	1495.2	3464.8	1288.6	6720.8	2307.2	1082.4	485.4	2279.2	827	1109.4	468.6	1899.8	739.8	2926	1069.4	1895.4	807.8	2120	806.8	2170.4	800.8	3149	1147	3079.2	1101.8	2581	986.2	3372	1213.4	2344.2	902.4	8854.4	2834.6	1424.4
	Proteobacteia	P.E.1	2711.6	1052	3752.8	1381.6	2419.4	1006.4	3081.8	1152.4	3576.4	1292.6	4927.4	1738.4	4385	1589.6	3915.8	1462	7704.2	2582.6	1116.8	527.4	2300	830	1159.6	482	2035.8	821.2	3232.2	1180	2024.6	862.8	2213.8	845.6	2332	900.6	3124.8	1140	3335	1211	2666.2	1005.2	3550.2	1275.4	2543.4	979.6	9480.2	3008.6	1535
	Proteobacteia	P.E.1	2569.4	1014.2	3621.2	1354.4	2321.4	991.6	2949.6	1099.4	3419.2	1227.8	4727.8	1628.6	4066	1464	3566.4	1346.8	7318.6	2493.2	1082.2	482.6	2376.4	881.8	1236.6	526	1879	747	2905.2	1087.4	1970.6	819.4	2142	827.4	2204.6	835.4	3194.2	1142.4	3114.8	1156.4	2544	960	3505.2	1265.4	2466.8	933.2	8709	2843.8	1510.6
	Proteobacteia	P.E.1	2448.2	944.8	3175.6	1173.4	2255.4	929	2914.8	1089.2	3390	1214.6	4610.2	1594	4014.6	1451.4	3650	1370.4	7100.4	2437.8	1078.4	492.2	2021	754.2	1042.8	438.2	1704.8	691.8	2755.2	1028.6	1790	757	2046.4	787	2121.2	782.2	3148.8	1129.2	2943.4	1082.6	2390.2	927.4	3321.2	1213	2447.6	930.4	8563.4	2762.4	1296
	Proteobacteia	P.E.1	2696.8	1038	3577.4	1322.8	2367.4	991	3277.2	1225.2	3746.4	1312.6	5225.4	1818	4389.2	1572.4	3994	1471.6	8229.8	2782.8	1189.4	523.6	2145.8	799.2	1047.8	439.2	1781.2	724	2835.2	1053	1898.6	800.8	2409.4	904.6	2462.6	902.8	3451	1243.6	3120	1136.2	2794.2	1053.4	3803.4	1339.2	2757.6	1038	9253	2959.4	1286.2
	Proteobacteia	P.E.1	2784	1056.4	3567	1314	2342.6	980	2975	1132	3410.6	1231.4	4814.8	1670.6	4212.2	1522.8	3611.4	1333.4	7528.8	2559	929.4	441	2255.6	820.4	1103.4	453	2304.8	927.4	2882	1055	1872.6	792.2	1964	762.2	1970.6	749.4	2841.4	1027.2	3163	1161.8	2306	899.8	3072.8	1120.2	2416.2	934.6	9001	2904	1589.8
	Proteobacteia	P.E.1	2538.2	965.4	3356.2	1248.8	2180	906	2973.8	1112.8	3411.4	1226	4700.8	1615.4	4176	1462	3706.6	1369.4	7640.2	2568.6	1068	481.8	2657.2	1016.8	1026.2	429	1680.8	667.8	2702.4	1000.8	1881.8	799.4	2205.2	832.6	2120	793.4	2980.4	1090	2918.4	1082.2	2579.8	976.8	3357.6	1236.4	2576.4	980.8	8647.4	2784.4	1335.4
	Proteobacteia	P.E.1	2740	1067	3237.8	1212.2	2233.4	933.4	2328.6	1078.2	3360.2	1185.4	4792.2	1682.8	4341.2	1563	3850.4	1407.6	7775.8	2646.4	942.6	443.8	2243.2	835	1126.6	469.8	1776.8	712.2	2752.2	1029.2	1856	785.6	1881.6	733.4	1842.4	693.4	2703.2	1000.8	2967.6	1090.6	2193.6	864.4	2990.2	1084.2	2374	905	8597.2	2738.8	1407.6
	Proteobacteia	P.E.1	2450.2	940	3281.4	1253.6	2287	948.8	3075	1141.2	3474	1248	4862	1679.2	4116.6	1465.2	3718.6	1373.6	7464	2548.4	1124.2	495.6	2194.4	799.4	1076	462.6	1724	694.6	2858.4	1053	1886.8	776	2201.6	820.2	2160.6	803.8	3111.4	1112.2	3050.2	1124.8	2529.6	986.6	3332.4	1171	2673	988.8	8965.4	2895	1448.2
	Proteobacteia	P.E.2	2687.4	1081.8	3670.2	1379.8	2929.8	1180.8	3408.6	1251.4	4363	1569.6	3788.6	1378.8	3892.4	1441.4	3749.4	1428	6887.6	2363	1108.8	514.2	2342	884.6	931.6	426.8	2441.8	1001.2	3308.4	1251	2541.4	1056.6	2642.2	1033.6	4171.6	1529.8	2883.2	1087	3822.6	1414.2	3241.2	1262.4	4598.2	1678.6	2658.4	1024.8	9147.2	2994.6	1103.8
	Proteobacteia	P.E.2	2492	985.4	3628	1363.4	2945	1219.6	3327	1253.6	4643.4	1628.6	3671.2	1351.2	4033.4	1434.4	4278.8	1577.6	6990.4	2413.6	1057.8	490.8	2205.4	823.6	893.8	408.2	2417	950.8	3378.2	1271.2	2402.6	997.8	2739.4	1046.6	4070.4	1479.8	3042.2	1148.4	3681	1357.8	3264	1254.4	4580.2	1679.4	2531	987	9139.2	3004.6	1088
	Proteobacteia	P.E.2	2589.4	1039	3703	1402.2	2918.2	1198.8	3197.2	1218	4565.4	1620.2	3580.6	1288.2	4085.2	1488.4	4134.4	1538.4	6657.2	2336.6	1076	491.6	2269.6	848	896.2	410.4	2415.2	960.2	3462.6	1290.8	2386.8	1006.4	2563.6	1011.2	4052.2	1485.2	2894.4	1093	3630.8	1351	3214.6	1243	4635.2	1654	2395.6	965.2	8992.2	2953.6	1081
	Proteobacteia	P.E.2	2476.8	990	3441.6	1289.2	2858.8	1154.4	3165.8	1190.6	4317.6	1498.4	3216.4	1176.6	4091	1480.2	3987.4	1497.4	6515.6	2237.4	1010.6	464.8	2005.4	775.2	809.6	367.6	2306.4	918	3248.6	1231	2275	962	2528.8	977.2	3920.8	1427.6	2911.6	1093	3559.4	1332.6	3073	1191.2	4419.8	1595	2418.4	930.4	8673	2839	871
	Proteobacteia	P.E.2	2454	989.2	3513.2	1318.2	2875.2	1172	3174.4	1181.6	4280.2	1504.8	3403.4	1225.4	4087.6	1464.8	4008	1502.6	6735.6	2376	1095.8	538.2	2239.4	834.4	869	396	2412	969	3524.2	1307.8	2374	986.2	2495.8	960.8	3807.8	1406.2	2839.6	1056.8	3676	1354.8	3124	1206	4327	1585.8	2366.4	949.4	8736.8	2861.4	1069.8
	Proteobacteia	P.E.2	2593	1010.6	3703	1400.4	3117.2	1279.6	3071.4	1161.6	4278	1532.8	3354.2	1231.4	4475.4	1614	4126.2	1509.6	6614.8	2315.6	988.2	477.2	2273.8	840.4	904	406.8	2257.2	908.8	3310.6	1261.4	2466.6	1039	2498.2	960.4	3839	1400.4	2815	1038.6	3850.6	1437.4	3072.6	1176.2	4260.6	1550.8	2310	908.6	8963	2941	1109
	Proteobacteia	P.E.2	2489.2	1002.6	3606.6	1361.6	3005.6	1216.2	3109.8	1176.6	4172.8	1482	3332.6	1207.6	4316.2	1547	3912.4	1445.2	6678.6	2320.6	999.8	473.6	2261.2	844.2	917.6	404.6	2236.4	901.4	3260.4	1227.2	2458.8	1020.6	2478	984.6	3822.4	1378.6	2787.2	1034	3845	1402.8	3033.4	1173.6	4390.4	1602.8	2318.8	931.6	8621	2840.8	1116
	Proteobacteia	P.E.2	2101.6	839	3071.4	1171	2962.8	1206.8	3286.8	1244.2	4735.6	1662.8	3710	1320.2	4012.2	1452.4	4258.2	1591	7080	2461.6	993.2	474.8	2275.2	893.4	821	369	1863	763	2800.8	1083.4	2214	945.4	2558.4	999	3914	1423.2	2976	1108.6	3441.4	1267.8	3081.6	1219.6	4523.4	1647.4	2366.2	958.6	8293	2763	330
	Proteobacteia	P.E.2	2405.4	971.2	3430.6	1286	3014.8	1211	3133.6	1172.4	4404.4	1551.4	3493	1242.2	4232.6	1527.6	4056.2	1471.6	6868.4	2346.4	892	419	2246.8	846.8	906	405.6	2223.8	899.2	3116.8	1199.4	2493.4	1048.8	2405.2	924.2	3706.8	1327	2788.6	1047.4	3766.2	1395.2	2938.4	1141	4234.4	1528.8	2321.2	922	8374.4	2740	1103
	Proteobacteia	P.E.2	2339.4	934.8	3288	1235.8	2913.4	1190.8	3181	1191.8	4435.4	1547	3339.6	1227	4222.4	1534.4	4012	1471.8	6555	2261.8	1037.8	481	2213.2	822.6	904.8	394.2	2284.4	897.4	3027	1167.2	2447.6	1029.2	829.4	306.6	3532.4	1262.8	2793.4	1037.6	3748.8	1370.8	2522.8	961.8	4307	1572.8	2420.4	926.6	8591.8	2798.2	1101.4
	Proteobacteia	P.E.2	2388.2	949.8	3481.2	1327.2	3030.4	1231.4	3142	1174.8	4346.8	1517.6	3365.6	1239.2	4260.8	1532.4	4000.2	1486.8	6591	2278	970.2	474.2	2221.8	841.8	903.8	406.8	2238.8	912.4	3080.4	1181	2462	1034.2	2453.4	949.4	3744.6	1378	2770.4	1049.4	3859.2	1474.2	3001.6	1156.2	4201	1544.4	2318.6	928.4	8547.8	2810.6	1115.4
	Actinobacteria	A.B.1	3421	1211.4	4062.4	1382.6	2517	944	3829.8	1313.8	3266.4	1103.8	3658.4	1245.6	3013	1038.6	2490.2	908.2	5829.2	1946.4	979.4	421.8	2095.8	742.4	756.8	316.8	3046.4	1063.6	3895.6	1353.2	2271.4	856	2698.2	958.8	3426.6	1171.2	2755.4	935.6	3324.6	1163.8	3095.2	1081.8	4026.2	1400.6	2496.2	937	8361.8	2692	672.2
	Actinobacteria	A.B.1	3294.6	1156.2	3814.4	1294.6	2400.4	898	3568.2	1247	3334.2	1119	3523.4	1211.2	2829.8	986.4	2807.6	1018.4	6277.8	2107.2	898	402.4	2040.2	749.4	769.8	312.2	3119.6	1068.8	3884	1298.6	2149.4	814.4	2722.8	976.4	3461.4	1193	2715.2	921.6	3083.4	1068.8	3174.4	1127.8	4228.4	1459.6	2412.4	906.6	8279.4	2659.2	635
	Actinobacteria	A.B.1	3307.6	1161.4	3886	1301.8	2433.8	927.2	3506.8	1213.2	3306.2	1104.2	3498	1176	2808.6	978.8	2711.2	964.8	6106.6	2037.8	909.8	407.4	1972	719.6	752.2	299	3121.2	1095.6	3989.4	1340.6	2111.6	806.6	2630.8	915.2	3299.2	1126.4	2602.2	886	3008.8	1043.2	3065.8	1094.8	3939	1369.4	2362.4	871.2	8126.8	2588.6	631.4
	Actinobacteria	A.B.1	3316.8	1126.2	3759.8	1263.2	2416.2	926.2	3469.2	1208.6	3153	1080.4	3418	1153.4	2900.4	1002.6	2581.6	932.4	5863.4	1962.6	918.2	400.2	1934.2	695.6	739.2	302	3024.4	1057	3809.4	1303	2092.4	787.8	2679	955	3169.6	1085.6	2573	878.6	3032.8	1063.8	2989.8	1063.2	3716.8	1317.8	2282	830.8	8029.6	2567.6	603.2
	Actinobacteria	A.B.1	3261.2	1145	3756	1266.8	2414.6	905.6	3556.2	1226.6	3183.2	1086.8	3472.8	1182.8	2906.4	1016.2	2644.6	957.4	5962	2027	897.8	399.8	2051.2	729.6	731.8	307.6	3114.6	1071.8	4008.4	1361.8	2089.2	799.4	2630.8	934.8	3172.8	1099	2597.6	888.8	3037.4	1060.8	3051.2	1092	3851.4	1325.4	2312.4	839.8	8032	2576.4	616.2
	Actinobacteria	A.B.1	3301	1153.2	3772	1312	2455.2	939.4	3447.4	1204.6	3113	1062.6	3379.4	1158.2	3321.8	1169	2544.4	922.2	5696	1931.4	894.2	404	1905.8	699.8	691.6	277.4	2765.4	964.4	3276.4	1116.8	2229.6	851.6	2643	933.6	3135	1066	2578.8	908.2	3219.4	1159.2	2918.8	1046	3802	1318	2286.4	830.8	8052.2	2629.8	612.6
	Actinobacteria	A.B.1	3290.6	1159.4	3672	1239.2	2430.2	933.8	3325.8	1152.8	3326.4	1147.2	3283.4	1118	3347.2	1184	2672.6	976.2	6297	2123.2	830.6	376	1864	682.4	712.2	301.2	2658.6	963.2	3654.8	1243.8	2178	829.8	2598.2	925.6	3216.4	1110.4	2152	751.6	3147.2	1114	2982.6	1061.2	3862.4	1360.6	2283.8	831.8	7928.2	2547.2	606.4
	Actinobacteria	A.B.1	2985.4	1053	3243.8	1103.6	2123.8	793.4	3708.2	1254.8	3637.2	1226.4	3714	1251	3154.2	1110.8	2854.8	1018.4	6322.2	2154.2	921.6	412.8	1873.6	678.2	706.4	297.6	2485.6	858.4	3269.2	1122.8	2264.2	877.8	2600	940.6	3483	1176.8	2482.8	852.2	3080.6	1087	3162.8	1117.6	4279	1466.4	2380.6	898.8	7814.8	2510.6	611.4
	Actinobacteria	A.B.1	3258.6	1130	3686.2	1238	2428.4	918.6	3620.8	1236	3417.8	1170.4	3512.4	1206	3218.8	1131.4	2704.4	954	6044.2	2005.8	929	401.6	1855	688	701.4	283.2	2590.8	906.2	3443.4	1180.2	2147.2	834.6	2672.2	941.4	3248.2	1125.8	2610.4	899.6	3246.8	1124.6	3070	1085.6	3947.8	1398.4	2361.2	870.6	7603	2486.4	594.4
	Actinobacteria	A.B.1	3176.2	1122	3512.2	1176.8	2402.4	926.2	3522.6	1244	3257.6	1114.4	3405.2	1138.6	3183.6	1119	2601.2	943	5888.4	1956.4	904	400.2	1833.8	674.2	696.4	296.2	2593.4	914	3391.4	1167.4	2152.8	827.4	2727.2	970	3154.4	1104	2619.6	893.6	3271	1139.2	3055.4	1085.8	3774.4	1309.8	2324.4	862.6	7775.2	2496.6	606.2
	Actinobacteria	A.B.1	3149.4	1107.2	3568.2	1203.4	2426.4	934.2	3491.4	1207.8	3188.2	1091	3393.6	1138.6	3161.6	1107.4	2685.2	977.8	6021.6	2050.2	878.6	388.6	1866	684.2	718.4	294.4	2617.6	916.2	3461.8	1202.2	2208.4	839.6	2538.6	911.8	3142.8	1074.8	2511.8	886	3191.4	1121.4	2921.2	1036	3786.6	1336.8	2296.2	849.4	7822.8	2502.8	621.6
	Actinobacteria	A.B.2	2153.2	809.8	3131.8	1126	1381.6	600.2	1573	604.2	2252.4	818.2	1434.8	544	2264.2	848	2547.2	960.4	6419.8	2192.6	973.2	468	1711	651.6	626.2	283.2	1041	414.6	2048.6	753.8	1081.8	478.2	1175	463	1464.8	555	1045.2	421.2	1407.2	525	1530.4	596.6	2074.8	777.4	2565.8	990.4	8791	2840.6	906.4
	Actinobacteria	A.B.2	1922.2	719.6	2907.2	1021	1424.4	614.2	1550.2	609.2	2205.6	806.4	1408.4	545.6	2254.8	833.2	2978.8	1112.6	6399	2222.2	908	454.4	1534.8	588.6	612.2	273.6	1057	400.2	1988	722	1044.6	463.2	1142.6	459.2	1547.6	573	1085.2	418	1378.6	500.8	1542.4	614.2	2024.6	750.8	2408.6	928.4	8199	2656	618.6
	Actinobacteria	A.B.2	1959.6	736	2954.2	1049.4	1345.4	577.2	1407.6	562.8	2145.4	759.4	1276.4	491.6	2229.4	805.4	2745.6	1040.2	6820.8	2282	865.2	409.2	1530.2	582.2	587.2	274.8	1047.8	415.2	1994.4	736.4	1008	423	1079.4	426	1435.6	525.6	975.4	393.2	1401.8	524	1436.4	550	1949	712.6	2377.6	893.6	8061.2	2609.2	520.6
	Actinobacteria	A.B.2	1953.2	713.6	2875.6	1019.2	1362.4	569.4	1408.2	535.8	2327.2	824	736.8	268.6	2237.6	816	2843.4	1046.2	6620.2	2221.6	736.8	353.6	1510.6	561.4	610.8	275.6	1055.2	412.2	1983	735.4	972	438.6	1030	391.2	1477.4	522.4	1055.8	387	1392.6	507.2	1228.6	483.2	1921.2	720.8	2527	994.4	7971	2571	610
	Actinobacteria	A.B.2	1885	695.8	2913.2	1049.4	1358.6	570.2	1338.4	508.2	2148	782.6	1235.8	465.6	2247.2	804.2	2817.2	1035	6224	2096.4	790.2	386.6	1575.6	587.2	589.4	280	1067.6	420	2091.8	746.6	995	438.2	1049.2	415.8	1323.6	494.8	918	365	1373	507.4	1395	537.8	1752.4	652	2202.8	857	8096	2630.8	613.6
	Actinobacteria	A.B.2	1795.8	669.8	2637.8	948.4	1437.2	616	1352.2	526	2151.8	773.2	1266.6	475.6	2496	913.6	2806	1053	6218.2	2116.6	826.6	400.6	1550.4	608	591.8	271.4	941.8	363.6	1762	667.2	1059.6	475.6	1064.8	413.8	1377.4	518.2	911.8	368.2	1488.4	571.8	1376.2	538.4	1818.8	686.2	2274.6	870.2	8437.8	2739.2	607.6
	Actinobacteria	A.B.2	1895.4	704.4	2636.4	941.4	1512.6	623	1323	508	2035.8	735.8	1177	450.8	2492	903.8	2722.4	998.2	6175.2	2086.8	768.4	368.6	1613.8	620	616	285.6	1014.4	406.4	1743	638.6	1104.2	471	1008.8	399.6	1307.4	489	902.2	352.2	1532	565.8	1366	524.4	1718	647.6	2181.2	831.6	8359.4	2722	666.2
	Actinobacteria	A.B.2	1673.6	619.2	2401.6	857.6	1548.6	653.8	1482.4	577.8	2243.8	799.4	1374	533.6	2478	907.8	3028.2	1128.2	6453.2	2194	920	438.6	1604	635.8	637.8	283.2	925	371.8	1579.8	576	1214.4	521	1131.4	448.6	1468.4	534	989.4	395.4	1491.6	570	1509.6	592.2	1930	716.4	2404.6	929	8258.4	2679.2	654.6
	Actinobacteria	A.B.2	1764.2	649.8	2547.4	935	1378.6	598	1444	549.8	2271.2	820.8	1315.2	486.4	2291	835.2	2937	1066.8	6543.2	2221	807.8	389.4	1529.6	592.2	588.6	267.4	870.6	356.2	1792.2	662.2	1039.8	459.4	1102.8	417.8	1423.2	527.8	1003	390.6	1426.8	518.4	1451.8	559.8	1903.2	720	2317	883.2	7903.6	2574.4	600.8
	Actinobacteria	A.B.2	1759	652.6	2501	893.2	1363.4	600.8	1331.6	514.4	2139	763.6	1246.4	475	2324.8	854.6	2866.8	1061.2	6171.6	2098.8	807.4	369.8	1525.8	577.6	581	250	903.6	358	1817.4	672.4	1030.4	454	1050.2	420.6	1410	506	934.4	361.4	1432.2	539	1420.4	546	1829	677	2319.4	878.6	8071.8	2626.4	608.8
	Actinobacteria	A.B.2	1718.2	655.4	2503.8	909.8	1424.8	614.4	1365.8	540.6	2188	756.6	1211.4	467.6	2310.6	849.6	2894.4	1057	6495.2	2194.2	780	367	1513.4	590.2	568.2	258.8	854	338.6	1696.4	639	1061.6	464.6	1047.2	409.4	1369.2	509.6	942.6	355.2	1456.6	539	1418.8	554.4	1803	659.2	2259.8	873.6	8174.6	2655.6	621
	Actinobacteria	A.B.3	925.4	366.8	1522.6	540.6	1772.2	719.2	1762.6	644.4	1564.8	551.8	3874.4	1317.2	3591.8	1257.6	3330.2	1184.4	8463.2	2784.6	768	351	1445.4	560.4	731.4	300	654	251.4	980.6	359.8	858.8	372.4	3804.2	1624.4	1027.4	378	1231.4	442.4	1272.8	465.2	1244.4	464.6	1258.4	455	2563	922.8	9291.6	2944.4	684.6
	Actinobacteria	A.B.3	943	357.6	1569.2	561.2	1744.4	706.4	1752	630.4	1741	612.8	3737.2	1254.8	3557.8	1238.6	3233.2	1156	8311.8	2735.2	782	333	1420.8	525.2	708.4	304.8	716	273.8	1026.2	377	871	422.4	1179	447.6	1061.4	389.8	1349.4	483.4	1323.8	466.2	1201.4	464	1297.8	471	2367	872.8	9454.2	2959.4	735.2
	Actinobacteria	A.B.3	711.4	283.8	1244	463.2	1639.8	660.6	1637.6	606.6	1357	485.8	3508.4	1190.6	3419	1183	3231.6	1161.8	7653.6	2521.4	709.2	328.6	1446.4	534	609.2	261.4	545.6	206	811	303.2	744.2	335.6	1119.8	411	966	358.8	1163.2	409.4	1153	427.8	1121	419.2	1161.4	425.8	2425.4	911.2	8746.8	2809.2	580.2
	Actinobacteria	A.B.3	828.8	330.8	1346.2	494.2	1644.8	682.6	1802.4	666	1625.2	585.4	4049.4	1382.2	3552.4	1239.2	3519.2	1268.6	8791	2894.6	787.8	362.6	1334.6	502	661.8	293.8	620.4	244.2	592.8	227.8	813	356.8	1215.8	456.2	1104.2	396.4	1246.8	463.2	1283.8	469.2	1232.8	477.4	1300.4	484.8	2790	1026.4	9904.6	3110.4	622
	Actinobacteria	A.B.3	812.2	314.4	1335.8	481.8	1502	625.2	1686.6	636.2	1523	540.6	3628.6	1254.6	3195	1135	3268.2	1174	8223.4	2743.8	742.2	338.6	1338	504	675.6	287.8	607.8	247	926.4	332	805.2	355.2	1169.8	449.2	1051	393.2	1260	463.6	1233.2	460.2	1179	451.8	1270.4	471	2630.6	965.2	9355.6	2932.4	649.6
	Actinobacteria	A.B.3	813.4	324.8	1384.6	513.2	1664.8	670.2	1785.2	663.4	1599	582.4	3982	1373.4	3391.2	1168.4	3223.6	1183.2	8301.6	2747.6	784.2	360	1309.2	483.6	619.2	264.6	627.8	248	893.4	340.6	801.2	361.6	1217.4	461.2	1106.4	401.8	1315.2	484.8	1222.4	459.4	1217.4	455.8	1324.2	483.2	2629.4	967.6	8890	2806.6	631.8
	Actinobacteria	A.B.3	925	371.6	1573	564.2	1762.8	692.6	1917.8	705.2	1669.6	614	4100	1381	3692	1294.6	3667.4	1314.2	9183.4	2995.6	790.6	362	1446.8	535.2	701	298.2	666.6	256.4	1072.2	386.8	840.4	378.6	1261	472	1100.8	400	1385	512.2	1327.6	481.6	1258.4	486.6	1371.4	510.2	2901	1073.2	9937.6	3145.4	709.6
	Actinobacteria	A.B.3	930.6	370.4	1412.2	511.4	1751	729.8	1677.6	618.2	1474.8	542.8	3697.8	1261.4	3506.2	1215.2	3397	1224.8	8620	2835.8	697.6	326	1344.2	513.2	653	272	613.8	245.8	986	355.4	876.4	403.2	1111.4	415	948.8	352.6	1120.8	418.4	1231	463.8	1201.4	449.6	1188.4	450.4	2896	1055.4	9348.6	2945	679.6
	Actinobacteria	A.B.3	797.2	312.6	1237.8	457.4	1785.6	706.2	1736.6	644.6	1477	533.4	3808	1284.4	3555.6	1211.4	3359	1214	8605.4	2828.8	758	337.4	1217.4	455.2	611.4	265.4	542.4	219	782.4	292	898	399.2	1242.2	458	1047.8	386.8	1230.2	428	1098.8	397.8	1216	456.2	1310	489	2867.2	1025	9072	2876.2	570.2
	Actinobacteria	A.B.3	954.6	388.8	1489	536	1690.8	680.6	1620.6	596.6	1346.6	478.8	3867.6	1300.8	3441.6	1199	2848	1049.8	8868.2	2907.6	675.8	324.6	1322.4	497	651	267	635.8	252.8	923.6	352.8	830.4	362	1087.2	420.6	914	338.4	1160.6	425.6	1165.2	425.8	1154	439.6	1168.6	432.6	2822	1012	9102	2881	698.4
	Actinobacteria	A.B.3	1010.4	386.6	1605.4	589	1686.8	677.8	1632	610.4	1432.6	509.2	3757	1271.2	3422	1190.8	3286.6	1168.8	8642.8	2829	692.4	328	1359.8	518.4	647.8	270	699	271.6	1076.4	399.2	853.4	367.4	1103.6	420	920.6	341.4	1141.8	414.4	1331	475.8	1119.8	421.8	1269.8	497.4	2932.8	1043.6	9103.8	2858.2	709.6
	Bacteroidetes	B.B.1	3249.6	1249.8	3293.2	1249.2	2909.6	1167.4	5143.4	1803.2	3430.8	1237	4157	1469.4	3106.6	1133.2	4276.6	1503.4	4395.8	1495.8	1635.6	683.8	3523.4	1246.6	1748.4	762	2327.2	918.4	3116.6	1163	1723	737.2	2345.6	883.4	2778.4	1013.6	2324.8	876.4	2427.2	911.6	2444	923	3536.2	1252.4	2782.2	1053	9353	3031.8	1306.6
	Bacteroidetes	B.B.1	2930.6	1138.4	3159.2	1172.2	3009.6	1172	4943.6	1714	3444.6	1224.2	4096	1431.6	3028.6	1118.4	4277.4	1494.8	4823.4	1621.4	1405.2	605	3406.6	1220.4	1347.8	540.2	2362.6	943.6	2992.8	1121.8	1758.4	764.6	2437	913.4	2690.2	974.4	2592.4	934.4	2420.4	900.2	2525.6	948	3731.8	1305	2640.6	998.2	8850.4	2856.8	1268.6
	Bacteroidetes	B.B.1	3011.6	1135	3055.6	1130.2	3036.8	1183.8	4603.4	1621.4	3181.2	1136.2	3835	1361.2	3014.4	1094.4	4032.8	1404.4	4408.4	1506	1438	634.6	3279.8	1170.2	1291.6	538.8	2363.2	929.8	3013.8	1139.8	1671.6	714.4	2314.8	851.8	2598.2	947.8	2302.6	856.6	2410.8	895.4	2395.6	901	3354.6	1195.8	2590.2	995	8577.4	2795.2	1222.8
	Bacteroidetes	B.B.1	2994.8	1135.2	3049.4	1133.8	2953	1153.8	4597.2	1588.8	3313.8	1188	3702.4	1295.2	3027.4	1105.6	3901.4	1390.8	4258.4	1465	1449.4	605.8	3311.4	1189.8	1305.4	540.4	2282.8	900.2	2928.8	1095.4	1670.8	711	2180	812.6	2572	948.6	2189	819	2419.6	896.4	2267.4	851.2	3280.8	1138.2	2557.4	970.2	8780.2	2832.6	1181.4
	Bacteroidetes	B.B.1	2977.4	1128.2	3197	1172	3057.8	1193	4627.8	1613.2	3162	1133	3832.2	1331.8	3114	1110.2	3841	1375	4297.4	1480.6	1388.6	603.8	3342.2	1190	1337.4	553.2	2359.2	911.4	3071.4	1132.2	1723.2	716.6	2239.2	830.6	2424	894.2	2189.2	806	2376.4	898.4	2282.6	875.8	3263	1142.2	2584.4	952.6	8717.4	2818.6	1290.2
	Bacteroidetes	B.B.1	2976.2	1138.4	3270.2	1228.4	3123.6	1213.4	4442.6	1541.6	3181.4	1147.6	3662.6	1314	3250.4	1169.8	3721.4	1339.8	4373	1490.8	1432.6	599.2	3310.4	1169.8	1284.8	508.6	2298	904.6	3046.6	1143.4	1823.6	776.8	2180.4	827	2376.4	885	2160.6	790.4	2559.2	948.2	2267.6	847.2	3187.4	1127.8	2492.8	970.4	8712.6	2852.6	1325.2
	Bacteroidetes	B.B.1	3035	1145	3193.2	1180.6	3052.8	1181.8	4532	1571.2	3153	1119.6	3690.2	1305.6	3245.2	1192.4	3732.8	1312.2	4395.2	1514.6	1377.8	588.2	3304.4	1195.2	1265.2	524.2	2312.6	923.4	3063.6	1143.6	1734	724	2165	817.4	2388.6	888.6	2111.2	784.6	2523.8	959.4	2213.6	828.6	3206.2	1141	2522.8	951.8	8685.4	2824.6	1309.8
	Bacteroidetes	B.B.1	2774.8	1056	2885	1087.6	2926.2	1138.6	5111	1741.4	3551.4	1241.2	4371.6	1482.4	3125	1124.8	4305.2	1503.8	4662.6	1580	1390.6	613.2	3247.2	1170.8	1267.2	529.2	2215.8	856.4	2775	1046	1814.6	750.8	2304.2	857.8	2655.4	975	2311.2	857.8	2488	912.6	2456.2	925.4	3624.6	1270.6	2612	982.6	8545	2773.4	1252.8
	Bacteroidetes	B.B.1	2919.2	1115	2983	1140.2	3021.4	1171	4719.6	1647.4	3326.8	1198	3868	1345.6	3259.8	1180	3935.2	1406.2	4422.2	1509.4	1431.8	601.4	3195.4	1174.8	1261.6	516.4	2257.2	889.4	2908.8	1091.6	1765.6	751	2320.4	871.6	2523.8	908.2	2199.2	824	2530.2	935.8	2336.2	884.2	3297.4	1167.2	2563.6	958.6	8655.8	2783.2	1304
	Bacteroidetes	B.B.1	2855.8	1078	3012.2	1134.2	2950	1130.4	4255.8	1504.4	3092.2	1102.6	3495	1233.4	3134.2	1146.6	3737.8	1322.4	4515.6	1557.2	1219.6	539	3149	1150.8	1249.4	514.6	2201.8	880.8	2875.8	1090.2	1732	734.6	2333.8	869.4	2544.8	923	2274.6	830.4	2475.2	924.6	2423	908.8	3243.8	1141.4	2552.8	972.6	8451.4	2714	1272.8
	Bacteroidetes	B.B.1	2945.8	1100	3086	1148.8	2944	1155	4670.4	1602	3181.4	1136.8	3711.6	1302	3211.6	1171	3871.4	1370.4	4405.2	1483.8	1339	580.2	3192.4	1151.2	1225.6	513.8	2225	881	2804.4	1068.2	1692.2	717.6	2166.4	804.6	2440.6	896.8	2120	814	2498.8	926.6	2286.4	876.6	3246.6	1160.8	2586.6	1006.4	8570.8	2791.6	1289
	Bacteroidetes	B.B.2	3129.8	1340.4	3034	1233.2	2808.4	1193.2	4700.4	1748.6	3398.2	1289.8	3858	1425	3037.4	1185	3471.2	1339.8	4185.2	1522.6	2216.4	953.4	6636	2297.6	2460.6	984	3083.8	1258.2	3083	1246.6	3447	1463.6	4821.2	1776.2	4290.8	1591.6	4475	1674.6	3641	1406.8	4011	1550.2	4597.6	1673	3707.8	1365.6	10720	3418	3877.2
	Bacteroidetes	B.B.2	2761.2	1149	2944.6	1193	2703.2	1164.6	4720.2	1728.8	3399	1290.4	3863	1473.8	3232.8	1322.6	3414.2	1294.6	4170.6	1518.8	2218	951	6304.4	2162.2	2644	1103.4	2947.6	1197.4	3121.2	1257.2	3413.2	1376.4	4875.4	1791.4	4239	1586.4	4378.6	1630.4	3615	1358	4070	1582	4528.6	1661.6	3658.8	1345.4	10234.6	3247.4	3768
	Bacteroidetes	B.B.2	2798.2	1146	3064.2	1188	2769	1177	4534	1697	3130.8	1182.4	3605.6	1361.2	3010.2	1161.4	3301.6	1274.2	3976.4	1445.8	2151.2	911.2	6360.6	2149.2	2247.8	919.6	2937	1202.4	3060.2	1239.8	3414.6	1413.8	4578.6	1690.2	3980.4	1508.6	3950.6	1471.8	3677	1392.8	3603.2	1397.8	4208.4	1563.8	3625.6	1358	10528.8	3330.4	3659.6
	Bacteroidetes	B.B.2	2824.8	1163.8	2770.4	1107	2728.4	1145	4416.6	1626.6	3132.8	1204.4	3508.4	1328.4	2888.6	1125.2	3438.6	1298.8	4090.8	1473.6	2094.2	896.8	6225.8	2110.4	2277.4	928.8	2883	1157.8	2956.8	1175	3431.4	1416.2	4606.2	1691.2	4041.8	1491.2	3957.8	1485.6	3523.4	1344.8	3814.2	1503.8	4316.2	1631.8	3601.8	1330.2	10019.4	3188.2	3618.4
	Bacteroidetes	B.B.2	2707.2	1120.8	2928.2	1154.4	2789.2	1183.8	4410.4	1641.4	3107.4	1184	3538.8	1318.6	2986.4	1131.6	3247.8	1242	3840.4	1403	2157.8	931.2	6279.2	2148.8	2296.8	912.4	2984	1201.8	3009.6	1214.4	3406.6	1433	4441.8	1647	3802.6	1423	3897	1465	3519.4	1343.8	3647.8	1427.2	4063.2	1527.2	3625.2	1335.2	10293.4	3273.6	3678.2
	Bacteroidetes	B.B.2	3016.2	1270.4	3167.8	1241.2	2901	1245.2	4406.6	1631.8	3026	1153.4	3575	1344.4	3129.8	1215	3184.6	1239.8	3815	1400.2	2130.4	903.8	6044.2	2090.4	2159.6	871.6	3438	1357.4	3709	1443.4	3780.8	1578.2	4337.2	1628.4	3733	1437	3803.2	1425.8	4139.8	1560.2	3625.4	1428.4	3944.8	1468.4	3671.4	1357.6	10170.4	3234	3920
	Bacteroidetes	B.B.2	2825.2	1160.8	2970	1172.8	2841.8	1206	4337.6	1623.2	2979.8	1142	3459.8	1282.4	2967.8	1148.2	3157.4	1236.8	3744	1388.4	2042.6	872.4	6191.6	2120.2	2330.8	922.6	3092.6	1234.4	3153.2	1283.2	3565.6	1467.2	4353.4	1601.2	3806.2	1432.4	3863.4	1433.2	3708.8	1407.8	3566.2	1385.6	3964	1465.8	3476.8	1310	10052	3189.8	3692.8
	Bacteroidetes	B.B.2	2555	1076.4	2526.6	1035.8	2606.6	1117.2	4707	1726	3417.6	1275	3809.6	1410.6	2615.6	1034.8	3531.4	1350.8	4186.4	1524.4	2242.2	952.8	6224.2	2160	2361	946.2	2779.4	1109.6	2770.8	1115.4	3420.6	1409.8	4856.4	1780.8	4230.6	1563.2	4276.6	1603.4	3499.2	1325.2	3998.4	1531.8	4568.2	1676	3710	1391.4	10009.4	3239.6	3758
	Bacteroidetes	B.B.2	2864.6	1144.4	2864.2	1145.2	2730.6	1149.2	4448.8	1639.4	3157.6	1175.6	3701.8	1372	2974.8	1170.2	3316.2	1256	3955.2	1456.8	2333.4	1032.6	6147.4	2124.6	2335	929	3077.2	1241.2	3138	1269	3456.2	1428.6	4562	1685	3913.8	1482.6	3935.4	1463	3646.8	1402.6	3736.2	1458.4	4064	1526.4	3904.6	1466.8	9866.4	3141.8	3582.8
	Bacteroidetes	B.B.2	2734.2	1146	2935.4	1179.8	2835	1202.8	4459.6	1641.4	3020	1148.8	3482.2	1324.2	2966	1180	3215.2	1219.6	3888	1432.6	2079	897.6	5853.4	2025.4	2197.2	887.2	3275	1302.2	3534.2	1398	3650.8	1477.2	4438.8	1649.2	3828.2	1451.8	3883.2	1465	4047	1514.6	3681.4	1432.4	3917.2	1499.4	3584	1327	9870.8	3133.6	3895.8
	Bacteroidetes	B.B.2	2718	1129.6	3026.6	1185.8	2843.2	1192.8	4415.4	1630.6	3061	1167.4	3582.8	1334.4	3055.8	1180.8	3205.6	1240.2	3808.6	1404.2	2170.6	913	5834	2005	2732	1199	3291.8	1298.4	3468	1377.8	3695	1496	4423.8	1628.8	1920	790	3841.4	1452.6	4024.8	1481.6	3530	1386.6	3839.8	1447.8	3543.6	1317.4	9858	3103.4	3978.4
	Bacteroidetes	B.B.3	3474.6	1361.8	4272.4	1523.2	3092.4	1237.4	4121.2	1471.2	4170.6	1455.6	3965.8	1410.2	3890.6	1394.6	4317.6	1552.2	6172.8	2130.2	1565.2	672	3633.4	1259.2	1328.6	543.8	2167.6	890.4	3100.2	1204.2	2086.2	890.6	2251.8	853.8	2847.2	1018.2	2351.2	878.2	2810.8	1037.8	2539.4	965.6	3271.6	1176.6	2651.6	1007.8	9428.6	3030.8	1241.4
	Bacteroidetes	B.B.3	3174.8	1190	3965.4	1421.6	3049.6	1184	4125	1494.8	4387.4	1506	3911	1386.2	3793.8	1353.4	4198.6	1501.4	6697.6	2294.8	1483.6	630.4	3538.8	1228.4	1293.6	544.6	1980	823.6	3359.6	1314.6	2064.4	878	885.6	335.8	2767.4	1001.6	2430.6	900.4	2779.8	993	1844.8	705.2	3450.8	1214.4	2536.4	935	8654	2796.6	1219
	Bacteroidetes	B.B.3	3115.6	1187.2	3913.8	1414.8	3076.6	1187.8	3766.4	1361	4041	1396.2	3515.2	1244.2	3849.8	1354.8	4002.2	1446.6	6500	2223	1349.6	577.2	3427.6	1186.8	1268.8	506.4	1979.8	823.2	2939	1106	2012.8	861.2	2325.4	867.6	2857.8	1028.8	2330.2	861.6	2767.2	1020.8	2528.4	960.6	3407	1215	2518.6	935.4	8579.4	2771.8	1144
	Bacteroidetes	B.B.3	3084.6	1172.4	3853.6	1390.2	3019.4	1164.8	3866.2	1390.6	3915.2	1380.6	3625.6	1290.4	3786.4	1333.2	4020.6	1443.2	6038	2076.4	1470	622.2	3350.2	1182.6	1268.2	509.2	1957.4	802	2890.6	1097.2	1979.4	851	2186.8	821.4	2771.4	969.2	2221.4	839	2766.6	963.2	2417	923.6	3276	1157.2	2446	909	8591.4	2783.4	1113.6
	Bacteroidetes	B.B.3	3417.4	1386.6	3839	1376.2	2947.6	1168	3995.6	1436	4168.6	1426.2	3663.4	1279.2	3798.8	1351.6	4038.6	1483.8	6137.8	2107.4	1505.6	624.4	3409.8	1198.6	1236.4	512.8	2021.6	835	2925	1108.6	2003.6	851.6	2255.8	835	2739.8	983	2276	848.6	2716.2	981	2568.6	992	3289.6	1153.6	2578.8	966.2	8606.2	2752	1148
	Bacteroidetes	B.B.3	2814.8	1078	3814.6	1370.2	2725.8	1075.2	3963.4	1408.2	4078.8	1414.2	3690.8	1307	3798.6	1362	3971.8	1437.4	6224.8	2126.4	1475.8	619	2438.4	888.4	901.4	388.2	2405.2	953.2	3290	1202.4	2189	934.2	2295.6	857.4	2671.8	940.4	2249.6	837	3163.4	1121.6	2528.6	954.8	3248.6	1171.4	2505.6	936.6	9042.4	2897.2	1574
	Bacteroidetes	B.B.3	5050.4	2293.4	4108.6	1475.8	3140	1225.6	3967.4	1434	4066.6	1401	3582.8	1274	3918.4	1417	3981.4	1427.6	6234	2116	1455.4	616.2	3377.4	1190.6	1270	508	2055.8	843.6	2972.2	1129.8	2081.6	902.2	2132	809	2728.4	969.6	2240.2	829.4	2924.4	1064	2412.8	922.6	3301.4	1161.4	2445.4	940.8	8353.2	2717	1145.8
	Bacteroidetes	B.B.3	2587.6	1000.2	3236.8	1197	2672.6	1054.6	4366.6	1561.6	4446.6	1535.2	4134.2	1433.6	3589.2	1289.2	4377.6	1594.2	6620.6	2262.2	1561.2	642	2410.6	873.4	910.6	384.4	1971.2	822	2762.6	1060.2	2181.2	932.4	2285.4	870.4	2879.2	1038.2	2375.2	882.2	3004.2	1094.2	2660.8	996.4	3413.8	1205.6	2576.2	984.8	8931.8	2862.8	1474.2
	Bacteroidetes	B.B.3	3185	1192.8	4182	1499.4	3081.2	1225.8	4062	1503	4255	1451.8	3680.6	1308	3986.4	1403.8	4099.2	1481.4	6340.2	2131.4	1463.2	603.8	3325.2	1188.6	1307.4	513	2097	857.2	2995.2	1128.8	2058.4	896	2255.2	834.4	2749.8	994.6	2244.8	833.8	2904.6	1061.4	2496.8	966	3301.2	1177.4	2519	932.4	8431.2	2735.2	1188.6
	Bacteroidetes	B.B.3	3176.4	1208.2	4065.6	1480.4	3089.2	1227	3942.6	1423.2	4209.8	1428.4	3676	1329.8	3917.2	1400.8	4053	1450.6	6265.6	2145.8	1453.4	601.4	3385.6	1215.6	1321.2	530	2054.4	843.4	2884.4	1098.8	2091.6	922.2	2271.2	860.8	2742.2	972.6	2268.6	855.4	2859	1059.6	2562.2	986	3297.8	1163.2	2573.4	959.4	8451.8	2726.6	1285.4
	Bacteroidetes	B.B.3	3200.4	1222.2	4156.2	1489.4	3087.2	1238.6	4020.2	1440.2	4083.2	1414	3688.2	1304.4	3985.2	1424.4	4145.4	1501	6458.8	2206.6	1491	627.4	3378.8	1191.2	1306	519.2	1995	827.2	2842	1083	2093.6	907	2228.8	833.2	2687	955.2	2284.4	862.4	2893	1051.4	2476.8	975.4	3229.8	1155	2470	918.4	8598.6	2783	1202.8
	Bacteroidetes	B.B.4	3064.4	1125.4	4182.4	1487.6	2704.2	1048.2	3548.2	1251.8	4043.4	1360.6	2941.8	1027.8	4133	1433.2	4295.4	1540.2	7875.4	2640.2	1598.2	620	3127.4	1066	1338.2	522.4	2081.4	778.6	2853.8	1045.4	1650.6	647.2	2202	788	2349.6	811.2	2171.8	774.2	2390	864.6	2278.2	831.6	2945	1024	2763.8	1011.8	9334	3004.8	1225.8
	Bacteroidetes	B.B.4	2986.8	1126.6	3818.2	1375.6	2693	1026.2	3735.6	1296.4	4029.8	1369.8	3373.4	1158.6	3931.8	1352.2	4315.2	1556.2	8141.2	2725.6	1484.8	593	3118.2	1075	1268.6	469.6	2062.8	796.8	2605.4	940.6	1674.4	666.4	2348.6	838.2	2489.6	844	2151.4	744.4	2310.8	804.4	2310.6	843.2	2988.4	1046.2	2498.4	916	8999.6	2856.4	1142.6
	Bacteroidetes	B.B.4	2856.8	1068	3717.6	1323.8	2645.2	999.8	3427.4	1214	4000	1354.8	3102.2	1067.8	3839	1309.6	4167	1478.2	7620.2	2559.6	1611.2	627.2	3009.4	1031.2	1292.2	470.2	1973.2	738.2	2635	950	1627.8	670.8	2238	797.4	2355.4	816.6	2046.4	730	2304.6	812	2221.2	816	2906.6	986.6	2585.6	934.8	8875.4	2830.6	1142
	Bacteroidetes	B.B.4	2871.4	1078	3701	1320	2670	1000.4	3341.2	1189.2	3977.4	1361.2	3001.6	1037	3725.2	1306.8	4088.8	1447.4	7512	2517.2	1613	629.6	3007	1030.6	1291.8	470.8	1942.2	713	2491.4	895	1614.8	632.4	2147.6	759.6	2320	802	2826.8	1157.6	2279	799.4	2160.4	782.4	2795.8	961.8	2534.2	921.8	8839	2833.8	964.6
	Bacteroidetes	B.B.4	2877.8	1064.8	3690.8	1315.2	2591	999	3421.6	1166.8	3928	1381.2	3091	1062.4	3956.8	1345.8	4031.8	1448.2	7752	2561.8	1531.8	609.2	2967.6	1038.4	1248.4	461.4	2025.2	744.2	2669.8	966.8	1584.6	648.8	2270.4	813	2304.4	789.4	2009.6	695.8	2302	791.2	2202.4	797.4	2862.4	979.8	2471.8	892.8	8475.2	2697.6	1070.4
	Bacteroidetes	B.B.4	2755	1021.6	3811	1360.4	2739.4	1053	3597.8	1245.4	4001	1358.2	3086.8	1065.2	3995.2	1406.6	4144	1469.2	7591.6	2508	1571.8	586.4	2985.2	1037.8	1267	482.6	2024.6	771.4	2698.2	980.4	1718.4	689.8	2277.4	804.2	2419.8	856.8	2052.4	729.8	2414.2	860.8	2263.6	835.6	2880.6	989.4	2406	901.2	9072.8	2926.8	1146.8
	Bacteroidetes	B.B.4	2773.4	1030.4	3761.4	1358.6	2784.6	1069	3381.6	1191.6	3939.6	1344.6	3046.2	1051	4076.6	1396.2	4024.4	1423.8	7766.2	2602.6	1522.6	594.8	3011	1024.6	1272.2	477.8	2003.2	746.8	2745.8	991.4	1696	679.4	2186.8	775.2	2261	805.2	2016.6	717.4	2423.8	860.8	2160.4	773.8	2766.6	956.2	2450	869.6	8583.6	2753	1131.2
	Bacteroidetes	B.B.4	2425	919.2	3199	1167.2	2626.8	1023.2	3820.2	1335.6	4306.2	1433.8	3410.8	1179.6	3806.2	1309.8	4496.4	1592.4	8381.8	2771.4	1482.4	590.8	2846.8	1001.6	1239.2	467.2	1804.4	682.6	2248.4	797	1778.6	695.2	2253.6	805.2	2497	865.6	2220.4	773.4	2287.6	803.6	2444.2	864.4	3054.2	1046.8	2474.6	902.2	8455.2	2733.6	1073
	Bacteroidetes	B.B.4	2651.4	990.6	3680.8	1328.8	2587.2	1001.6	3521.8	1236.6	4042.4	1383.6	3182.8	1099.8	3962.6	1379.6	4187	1501.8	7949.6	2618.2	1571.6	610.8	3004.4	1030.6	1297	481.8	1892.2	712.2	2511	902.8	1625	635	2356.2	830	2370.2	828.8	2091.8	735.8	2319.8	845.4	2288.6	823.4	2900.6	999.4	2495.2	918.6	8605.4	2779.6	1153
	Bacteroidetes	B.B.4	2612.6	982.2	3692.8	1297.8	2452.4	932.6	3352.4	1196.6	3914	1341.4	3031	1047.8	3974.4	1364.8	4135.8	1437.8	7871.2	2613.4	1504.8	584.2	3012.8	1035.2	1279.8	487.4	1891	734.4	2466	890.6	1580.2	634.8	2233.6	799	2232.4	788.6	1988.4	716.4	2333.2	828	2212.8	782.6	2775.4	969.8	2487.8	895.8	8570.4	2749.8	1180.4
	Bacteroidetes	B.B.4	2685.4	994.4	3730	1338.2	2604.8	999.6	3361.4	1185	3876.8	1325.6	3044.4	1034.6	4059	1377.2	4166.8	1479.2	7842.2	2582.2	1442.4	565.2	2958.2	1021.8	1283.2	473.2	1932.2	724	2466.4	911.6	1630	640	2196.6	776.2	2277.8	790.2	2032.8	691.2	2337.2	816	2156.8	790.4	2775.8	958.6	2374.8	862.4	8720.8	2799.6	1206.4
[truncated: 4 more columns]

## Sheet: Dataset 3
	Dataset 3. Data-set matrix of the fluorescence intensity generated by the chemical nose after the addition of obesity model bacteria mixtures. The two columns at the right indicate whether the data in the corresponding row was used as training data (denoted by “–”) or test data (results of the verification are shown) in the holdout test.
		pH 7.0						pH 5.0						Verification by Holdout test	Verification by Holdout test
	Analytes	-None	-Dap	-Gly3	-Leu	-Phe	-Pht	-None	-Dap	-Gly3	-Leu	-Phe	-Pht
		Ch1	Ch1	Ch1	Ch1	Ch1	Ch1	Ch1	Ch1	Ch1	Ch1	Ch1	Ch1	Distinction between bacterial strains	No distinction between bacterial strains
	0.25 A (F.C. / B.B.1)	1288	889.4	1118.6	652.6	1539.4	863.4	1543.8	839	2623.6	1181.4	1070	3076	-	-
	0.25 A (F.C. / B.B.1)	1531.4	1041.6	1249	743.6	1650.8	973.4	1619.8	971	2902.2	1398	1141.8	3252.4	-	-
	0.25 A (F.C. / B.B.1)	1287.8	853.4	1069.6	624	1505.2	817.6	1513	794.8	2506	1161.4	988.8	2600.8	-	-
	0.25 A (F.C. / B.B.1)	1463.2	956.6	1176.8	656.2	1576	913.4	1619.6	927.4	2687.2	1306.8	1052.8	2979.6	-	-
	0.25 A (F.C. / B.B.1)	901.8	729.4	903.6	553.4	1273.6	728.4	1188.6	742.6	2113.2	931.8	897.6	2378.4	-	-
	0.25 A (F.C. / B.B.1)	1176.6	820.4	1026.2	657	1401.2	845.6	1188.2	864	2302.8	1080	969.8	3021.8	-	-
	0.25 A (F.C. / B.B.1)	1199.2	781.2	999.8	610	1377.2	782.2	1432.6	795.8	2326.8	1098.2	883.6	2518.2	0.25 A (F.C. / B.B.1)	0.25
	0.25 A (F.C. / B.B.1)	1419.8	897.6	1109.8	622	1510	895.6	1468.4	920	2488.6	1258.4	983	3058	0.25 A (F.C. / B.B.1)	0.25
	0.25 A (F.C. / B.B.1)	1233.4	845.6	1074	636.8	1499.4	837.4	1543	801.4	2503.6	1132	1032.2	2722.8	0.25 A (F.C. / B.B.1)	0.25
	0.25 A (F.C. / B.B.1)	1479.6	970.2	1212.2	699.4	1591.8	946.4	1593.4	905.4	2688.4	1279.4	1037.4	2816.6	0.25 A (F.C. / B.B.1)	0.25
	0.67 A (F.C. / B.B.1)	1573.8	1083.4	1181.4	882.6	1715.2	1047.6	1759.4	1047.2	3240.8	1381	1107.4	3041.6	-	-
	0.67 A (F.C. / B.B.1)	1605.4	1098.2	1226.6	812.6	1721.2	989.2	1781.4	1011.2	3229.4	1392.4	1124	3226.4	-	-
	0.67 A (F.C. / B.B.1)	1508.8	1058.2	1156.4	793.6	1637.2	999.6	1758.2	1021.6	3057.4	1349.4	1092.8	3133.8	-	-
	0.67 A (F.C. / B.B.1)	1595.4	1088.8	1201	778.6	1696.4	962.8	1798.2	913.8	3096	1356	1116.2	3164.6	-	-
	0.67 A (F.C. / B.B.1)	1186.8	928.2	1026.4	731.2	1404.6	885.6	1401.8	919	2716.4	1213.4	1006.6	2824	-	-
	0.67 A (F.C. / B.B.1)	1210	950.6	1067.4	726.2	1448.6	876	1438	886.4	2758.8	1172.2	1013.8	2933.2	-	-
	0.67 A (F.C. / B.B.1)	1411.2	1022.4	1074.6	770.2	1515.4	915.4	1572.6	950	2912.6	1287.6	1045.8	2980.2	0.67 A (F.C. / B.B.1)	0.67
	0.67 A (F.C. / B.B.1)	1476.6	1005.6	1100.6	761.4	1556.6	905.4	1699	916.4	2965.4	1305.2	1047.4	3109.4	0.67 A (F.C. / B.B.1)	0.67
	0.67 A (F.C. / B.B.1)	1501	1050.4	1207.6	806.8	1635.2	976.4	1742.2	1008.4	3069.2	1350.6	1089.6	3062.8	0.67 A (F.C. / B.B.1)	0.67
	0.67 A (F.C. / B.B.1)	1513	1042.6	1194.2	775.2	1591.6	944.8	1749.2	928.4	3118	1340	1081.6	3033.4	0.67 A (F.C. / B.B.1)	0.67
	1.50 A (F.C. / B.B.1)	1662.2	1191	1208.2	911	1625.8	1013.6	1874.8	1099.6	3521.2	1539	1116	3402.6	-	-
	1.50 A (F.C. / B.B.1)	1804	1223.6	1280.4	988.6	1722	1080.2	1905	1120	3525.6	1561.6	1168.6	3309.4	-	-
	1.50 A (F.C. / B.B.1)	1655.8	1162.4	1196.2	906	1638	1008.4	1840.2	1070.6	3240	1491.4	1108.6	3442.8	-	-
	1.50 A (F.C. / B.B.1)	1733.8	1212	1242.2	963.4	1670.6	1047.4	1877.6	1121.6	3512.6	1573.2	1129.6	3252.4	-	-
	1.50 A (F.C. / B.B.1)	1289.6	998.8	1040.8	813.4	1439.6	903.2	1501	955.6	2931.4	1327.8	972	3124	-	-
	1.50 A (F.C. / B.B.1)	1309.6	1030.8	1045.8	862.6	1442.6	933.8	1477.4	987.8	2957	1356.6	1023.6	3180	-	-
	1.50 A (F.C. / B.B.1)	1533.4	1091.4	1109.4	841.4	1569.4	911.8	1711.8	1010.8	3349.2	1474.2	1000.2	3279.6	4.00 A (F.C. / B.B.1)	1.50
	1.50 A (F.C. / B.B.1)	1580.8	1105.6	1111.6	896.8	1550.2	968.8	1732.4	1043.4	3316	1486	1053.2	3350.6	1.50 A (F.C. / B.B.1)	1.50
	1.50 A (F.C. / B.B.1)	1622.4	1121.8	1170.2	883.2	1554	978.2	1799.2	1036.4	3310.6	1457.8	1060	3146.4	1.50 A (F.C. / B.B.1)	1.50
	1.50 A (F.C. / B.B.1)	1706.2	1201.6	1242.2	917.2	1633.8	1023.2	1824.8	1051.8	3343.2	1490	1079	3059.2	1.50 A (F.C. / B.B.1)	1.50
	4.00 A (F.C. / B.B.1)	1897	1246.2	1288.6	987.8	1714.4	1000.4	1921	1122.6	3783.8	1610.4	1049.4	3377.8	-	-
	4.00 A (F.C. / B.B.1)	1789.8	1316	1221.4	1011.6	1647	1075.2	1925.2	1137.2	3683.8	1658.8	1115.8	3533	-	-
	4.00 A (F.C. / B.B.1)	1727.8	1189.4	1224.6	961	1581.2	949	1853.2	1054.2	3756.4	1573.4	996.2	3033.8	-	-
	4.00 A (F.C. / B.B.1)	1652.4	1258.8	1164.4	977	1584.6	1001.8	1847.8	1098	3440.4	1579.8	1104.6	3174.6	-	-
	4.00 A (F.C. / B.B.1)	1312.2	973.4	1029	869.8	1356	871.8	1504	947.2	3245.6	1294	908.4	2862.2	-	-
	4.00 A (F.C. / B.B.1)	3090.2	1005.6	999	878.8	1349.8	901.8	1461.2	972.4	3073	1325	943.2	2810.6	-	-
	4.00 A (F.C. / B.B.1)	1637.4	1155.2	1088.8	915.6	1487.4	930.6	1803.8	1000.6	3528.4	1493.4	922.2	2991	4.00 A (F.C. / B.B.1)	4.00
	4.00 A (F.C. / B.B.1)	1540.8	1188.4	1040.6	966.8	1459.6	962.8	1684.6	1040.2	3352.6	1549.4	997.2	3439.6	4.00 A (F.C. / B.B.1)	4.00
	4.00 A (F.C. / B.B.1)	1734.6	1213	1259.4	948.4	1595	952.6	1855.6	1048.2	3703.2	1537.8	992.8	2963	4.00 A (F.C. / B.B.1)	4.00
	4.00 A (F.C. / B.B.1)	1630.4	1215	1169.8	957.4	1551.8	965	1769.2	1064	3534	1532	991.2	2512.2	4.00 A (F.C. / B.B.1)	4.00
	0.25 B (F.R. / B.B.2)	1461.8	1792.8	1451	1860.2	2326.6	2332.4	1901.6	2083	2370.4	2004.2	2513.8	4329.4	-	-
	0.25 B (F.R. / B.B.2)	1530.6	1901.4	1464.8	2286.6	2159	2568.6	1894.6	2219.6	2552	2216.8	2694.6	4662	-	-
	0.25 B (F.R. / B.B.2)	1411.2	1698.2	1393.8	1723.6	2185.6	2314.4	1841.2	1954.6	2286.2	1973.4	2328.2	3905.4	-	-
	0.25 B (F.R. / B.B.2)	1481.2	1851	1426.8	1904.2	2188.2	2542	1891	2077.2	2454.8	2133.2	2495.8	4019.6	-	-
	0.25 B (F.R. / B.B.2)	1063.8	1393.6	1175.2	1657.2	1782.6	1960.8	1553.8	1881	1979.2	1634.2	2034.6	3842.2	-	-
	0.25 B (F.R. / B.B.2)	1133.8	1393.8	1176.2	1780.4	1907.2	2224.2	1613.6	1971.4	2081.6	1736.6	2163.6	4119.2	-	-
	0.25 B (F.R. / B.B.2)	1297.4	1564.2	1284.6	1685.8	1975	2118.2	1764	1902.6	2125.8	1869	2084.4	3752.4	0.67 B (F.R. / B.B.2)	0.25
	0.25 B (F.R. / B.B.2)	1315.8	1652.4	1334.6	1741.4	2042.2	2200.8	1711.6	1982.2	2208.2	2025.8	2304	4379.4	0.25 B (F.R. / B.B.2)	0.25
	0.25 B (F.R. / B.B.2)	1387.4	1722.8	1382	1761.8	2149.8	2229.4	1854.2	2113.6	2158	1955.6	2362.8	3435.6	0.25 B (F.R. / B.B.2)	0.25
	0.25 B (F.R. / B.B.2)	1471.8	1826.8	1423	1839.8	2151.2	2457.4	1833	2066.2	2360.6	2135.6	2404	4061.2	0.25 B (F.R. / B.B.2)	0.25
	0.67 B (F.R. / B.B.2)	1584.4	2005.8	1476.4	1784.8	2340.2	2361.2	2175.4	2082.2	2913	2208	2472.2	4325.8	-	-
	0.67 B (F.R. / B.B.2)	1618.2	2034.4	1582.8	1807.2	2430.2	2308.4	2084.2	2133.8	2787	2164.4	2388	4211.6	-	-
	0.67 B (F.R. / B.B.2)	1509.4	1947.8	1501	1776.2	2283.8	2211	1994.2	1936.8	2587	2073.4	2346.6	3885.2	-	-
	0.67 B (F.R. / B.B.2)	1689.2	1860.4	1580.6	1754.8	2408	2267.4	2074.2	2085.6	2699	2232.8	2298.8	4221.2	-	-
	0.67 B (F.R. / B.B.2)	1171.4	1537.6	1311	1752.4	2023.6	2046.2	1666.4	1975.4	2559.4	1836	2112.2	4006.8	-	-
	0.67 B (F.R. / B.B.2)	1281	1544.4	1312.4	1774.6	2060.8	2124	1777	1993	2464	1781.4	2078.6	4073.6	-	-
	0.67 B (F.R. / B.B.2)	1370	1794.4	1403.8	1742.8	2156	2160.4	1898	1915.2	2645.6	2007.6	2110	3963.8	0.67 B (F.R. / B.B.2)	0.67
	0.67 B (F.R. / B.B.2)	1545.4	1749.4	1416.8	1749.4	2254.2	2199	1842.8	1995.2	2619.4	2079.8	2198.2	4201.8	0.67 B (F.R. / B.B.2)	0.67
	0.67 B (F.R. / B.B.2)	1599	1971.2	1503.6	1791.2	2212.8	2225	1988.6	1951.6	2680.6	2114	2332	4101.2	0.67 B (F.R. / B.B.2)	0.67
	0.67 B (F.R. / B.B.2)	1686.2	1929.2	1545.2	1781.8	2330.6	2227.8	2011.4	2071.8	2688.2	2118.2	2263.4	4036	0.67 B (F.R. / B.B.2)	0.67
	1.50 B (F.R. / B.B.2)	1862.6	2017	1712.4	1591.6	2571.6	2018	2479	1889.4	3754.8	2193.6	2002.4	4243.2	-	-
	1.50 B (F.R. / B.B.2)	1891.2	1989.4	1767	1655.8	2603.8	1960.8	2472.6	1832.6	3757.2	2115.4	2137.8	4259.8	-	-
	1.50 B (F.R. / B.B.2)	1884.8	1963.8	1648	1522.6	2466	1925.2	2406.8	1823.8	3626.4	2111.4	1898.8	4275.4	-	-
	1.50 B (F.R. / B.B.2)	1876	1960.8	1760.2	1609	2525.4	1925.6	2376.8	1757.2	3670.2	2039.8	1990	4117.4	-	-
	1.50 B (F.R. / B.B.2)	1367	1615.6	1437.4	1442.4	2134	1831.4	2021.2	1820.6	3175	1804.4	1755.2	4277	-	-
	1.50 B (F.R. / B.B.2)	1324.6	1516.4	1420.2	1526.6	2170	1699.4	2045.4	1734.8	3226.6	1793.4	1721.6	4232.2	-	-
	1.50 B (F.R. / B.B.2)	1712	1835.2	1542.6	1481	2287.4	1898.2	2215	1710.6	3442.8	2097	1792	4036.2	1.50 B (F.R. / B.B.2)	1.50
	1.50 B (F.R. / B.B.2)	1774.8	1852.4	1543.2	1522.2	2293.4	1816.8	2209.2	1736.8	3456.2	1994.4	1851.8	4206.8	1.50 B (F.R. / B.B.2)	1.50
	1.50 B (F.R. / B.B.2)	1910.2	1905.8	1648.8	1479.2	2429.2	1943.8	2326	1771.8	3606.2	2088.4	1834.6	3885	1.50 B (F.R. / B.B.2)	1.50
	1.50 B (F.R. / B.B.2)	1910.4	1915.8	1756	1548	2522.6	1865.6	2373	1751	3589	1991.8	1873.2	3746.6	1.50 B (F.R. / B.B.2)	1.50
	4.00 B (F.R. / B.B.2)	2007.4	1658.6	1495.4	1233.6	2137.2	1543.2	2282.4	1515.4	3978.4	1902.2	1575.2	3848	-	-
	4.00 B (F.R. / B.B.2)	1751.2	1618.4	1541.2	1254	2102.6	1525.6	2271.4	1529.6	3901.4	1916.4	1543.6	3836.2	-	-
	4.00 B (F.R. / B.B.2)	1931.2	1640.2	1441.8	1182.6	2072.6	1552.2	2191	1536.6	3963.8	1857	1508.4	3499	-	-
	4.00 B (F.R. / B.B.2)	1837.4	1684.6	1579	1257.6	2133.8	1566.2	2293.2	1558.2	3790.2	1991.4	1561	3638	-	-
	4.00 B (F.R. / B.B.2)	1493.8	1335.4	1261.2	1116.6	1829.8	1417.6	1789.2	1420.2	3311.6	1567.8	1329	3698.4	-	-
	4.00 B (F.R. / B.B.2)	1355.6	1406	1273.2	1230.4	1833.6	1430.6	1934.8	1518.2	3262.6	1663.2	1344.6	3318.4	-	-
	4.00 B (F.R. / B.B.2)	1802.8	1556.6	1311.8	1120.6	1928.4	1477	2102.8	1430.6	3546	1765	1394.2	2848.4	4.00 B (F.R. / B.B.2)	4.00
	4.00 B (F.R. / B.B.2)	1690	1559	1330.2	1181.8	1966.2	1485.8	2042.4	1436.4	3575.2	1875.8	1459.2	3874.8	4.00 B (F.R. / B.B.2)	4.00
	4.00 B (F.R. / B.B.2)	1989.2	1688.8	1510.4	1198.4	2084	1522	2163	1490.6	3835	1852.2	1488.8	3497.8	4.00 B (F.R. / B.B.2)	4.00
	4.00 B (F.R. / B.B.2)	1830.8	1700.6	1538.2	1258	2106.8	1555.8	2296.6	1525.4	3770	1900.2	1508.8	3376	4.00 B (F.R. / B.B.2)	4.00

## Sheet: Dataset 4
	Dataset 4. Data-set matrix of the fluorescence intensity generated by the chemical nose after the addition of mouse gut microbiota. The rightmost column indicates whether the data in the corresponding row was used as training data (denoted by “–”) or test data (results of the verification are shown) in the holdout test.
			pH 7.0						pH 5.0						Verification by Holdout test
	Analytes		-None	-Dap	-Gly3	-Leu	-Phe	-Pht	-None	-Dap	-Gly3	-Leu	-Phe	-Pht
	Conditions	Mouse ID	Ch1	Ch1	Ch1	Ch1	Ch1	Ch1	Ch1	Ch1	Ch1	Ch1	Ch1	Ch1
	Healthy	No.1 (-)	3471.8	2743.4	6119.8	4069.2	8360.8	1373.6	1902.2	2507	2893.6	2946.2	8559.8	8413.2	-
	Healthy	No.1 (-)	3354.8	2749.6	5838.8	3825.6	7945	1188.6	2093.2	2566	2893.4	2896.4	7901.6	7554.6	-
	Healthy	No.1 (-)	3221.8	2614.4	5527	3717.6	7999.4	1152.6	2055.4	2495	2782.6	2687.6	7505.2	7229.6	-
	Healthy	No.1 (-)	3400.2	2779.8	5954.2	3873.8	8679.2	1128.8	1948.2	2612.8	2865.6	2785.6	7480.6	7174.8	-
	Healthy	No.1 (-)	3335.2	2838	5974.6	3733.6	9311.2	1257.2	1812.6	2464	3061.4	2926.6	8049.6	8050	-
	Healthy	No.1 (-)	4010.4	3196.6	6456.8	4280.8	9662.2	1402	2045	2639.4	3114	3044.6	8161.8	8160	-
	Healthy	No.1 (-)	3684.2	3013.8	6481.2	4459.6	9897.4	1267.8	2279.8	2656.6	3216.6	3152	8423.4	8376.4	-
	Healthy	No.1 (-)	4077.6	3295.4	6538.4	4338.8	9874.8	1286.6	2176.8	2482.6	3098.2	3080.8	8444.4	8072.4	Healthy
	Healthy	No.1 (-)	3830	3062.8	6449	4322.2	9892.2	1194.6	2201.8	2654.2	2972.4	2931	8098.6	7864.6	Healthy
	Healthy	No.1 (-)	3818.2	3166	6605.6	4444	10169.4	1289.8	2195	2593.4	2861.8	3056.8	8427.4	8038	Healthy
	Healthy	No.1 (-)	3652	3012.2	6189	4144.2	9714	1225.2	2099.8	2490.2	3032.4	2958	7984.2	8182.2	Healthy
	Healthy	No.2 (-)	3437.8	2654.6	6060.4	4204	8996	1589.6	2334	2403	2985	3133.8	7140.4	8652.6	-
	Healthy	No.2 (-)	3832.4	2646.6	5774.8	3898.4	8112.2	1390.6	2416.6	2216.4	2887.8	2978.8	6802	8045.4	-
	Healthy	No.2 (-)	3391.4	2580.6	5753	3853.8	8381.4	1358.8	2340.2	2215	2852.2	2918.2	6886.8	7878	-
	Healthy	No.2 (-)	3393.8	2724.4	5825.8	3921.6	8874.8	1339	2248.8	2318.8	2731.2	2813.4	6639.8	7395.8	-
	Healthy	No.2 (-)	3390.2	2746.4	5481.2	3834	9454.2	1433	2246	2417.2	2977.4	3043.8	6809.8	8648.8	-
	Healthy	No.2 (-)	3725.4	2941.2	6134	4167.6	9579	1437.8	2294.6	2312.4	3016.8	3144.2	6948.4	8368.4	-
	Healthy	No.2 (-)	3844.4	2921.2	6023.8	4200.4	10028.8	1503.6	2638.4	2379.2	3256.8	3226	7559.6	8885.4	-
	Healthy	No.2 (-)	4002.4	2997	6333.4	4321.2	9996.8	1490.8	2506	2209.4	3097.6	3098.4	7330.2	8483	Healthy
	Healthy	No.2 (-)	3819.6	2924	6177.6	4269.4	10054.2	1504.2	2531.4	2336.6	2877.4	3030.4	7241.2	8074	Healthy
	Healthy	No.2 (-)	3997.2	2999	6205.6	4133.2	10175.2	1455.8	2538.6	2440.2	2975.8	3033.6	7225.2	8596.2	Healthy
	Healthy	No.2 (-)	3569.6	2637.4	5684	3930.8	9057.2	1406	2467	2189.6	2856.2	2962.2	6644	8512	Healthy
	Healthy	No.3 (-)	2915	2459.2	5089.2	3759.8	8791.2	1398.2	2030	2049.2	2635.2	2922.2	6028.2	8483.4	-
	Healthy	No.3 (-)	2930.8	2334.8	4995.4	3447.6	8281.4	1309	2171	1936	2641	2765.2	6086	7336.6	-
	Healthy	No.3 (-)	2912.8	9884.4	4939.2	3454	8310	1294.8	2175.6	1911.6	2609.6	2709.2	5920.2	7834	-
	Healthy	No.3 (-)	3046.8	2556	5239.2	3458.2	8734.8	1279.4	2100.6	1940.6	2595.4	2727	5917.6	7479.8	-
	Healthy	No.3 (-)	904.8	2479.2	5003	3515.4	9268.8	1341.8	1837.2	2085.2	2695.8	3021.4	4896.4	7116.8	-
	Healthy	No.3 (-)	3295.2	2697.8	5379.8	3716.6	9521.8	1335.8	2177.8	2039	2757.8	2939.2	6181.8	8271.2	-
	Healthy	No.3 (-)	3343.2	2657	5365.8	3842.4	9295.6	1396.6	2428.4	2062.4	2760.2	3124.8	6606.2	8531.2	-
	Healthy	No.3 (-)	3469.2	2729.8	5408.2	3837	9711.2	1355.4	2270.6	1965.6	2791.8	2966.4	6407.4	8472.2	Insomnia
	Healthy	No.3 (-)	3274.8	2748	4999.4	3764.8	9468.8	1360.4	2297.6	1986.8	2674.2	2873.6	6026.2	8254	Healthy
	Healthy	No.3 (-)	3264	2770.8	5405.4	3713	9548.6	1355.2	2316	2043.4	2708.6	2851.8	6155.2	8337	Healthy
	Healthy	No.3 (-)	3280.4	2570	5308.2	3685.8	9184.2	1316.4	2416.6	1933.6	2687.2	2971.6	6254.2	8779.8	Insomnia
	Healthy	No.4 (-)	3420.6	2804	6341	4042.8	8895.6	1275.2	2033.4	2399.2	2910	2914	7823	8705.6	-
	Healthy	No.4 (-)	3248.2	2689.6	5871.4	3680.8	8320.4	1270	2023	2260.2	2825.8	2783.8	7259.4	7695.6	-
	Healthy	No.4 (-)	3292.6	2639.8	5819	3719.4	8239.8	1260.4	1938.2	2228.6	2740	2691.6	7193.2	7826	-
	Healthy	No.4 (-)	3320.8	2801.2	5975.2	3755.6	9251.4	1184.2	1969.8	2293.6	2593	2667.4	7104.8	7392.6	-
	Healthy	No.4 (-)	3198	2722.4	5640	3674.8	9161.2	1244	1860.4	2200.8	2787	2823	7031.8	7733	-
	Healthy	No.4 (-)	3797.8	3048.6	6578	4171.2	9906.2	1299.8	2135	2429.2	2911.2	2947.8	8066	8070	-
	Healthy	No.4 (-)	3777	2903.8	6181.2	4256.8	10312.2	1332.6	2257	2309.6	2952.6	3069.8	8180.6	8259.4	-
	Healthy	No.4 (-)	3785	3016.4	6901.4	4112.8	9976.2	1252.8	2203.8	2268.8	2980.4	2921.2	7711	8599.4	Healthy
	Healthy	No.4 (-)	3711.2	3074.4	6244.4	4164.2	10302	1362.6	2294.2	2371.2	2984	2919	7332.2	8314.2	Healthy
	Healthy	No.4 (-)	3951.4	3033.2	6252.6	4098.4	10113.8	1234	2272.8	2267	2847	2838.6	7710	8663.4	Healthy
	Healthy	No.4 (-)	3688.8	2781.4	5944.6	3909.2	9307	1230.6	2210	2150.8	2801.2	2854.4	7425	8629	Insomnia
	Insomniac	No.1 (+)	2571	2415.8	4977.2	3432.4	9197.2	1357.4	1570.6	1787.6	2431.2	2654.4	6163.2	8730.6	-
	Insomniac	No.1 (+)	2599	2335.4	4802.8	3106.4	8157	1190.8	1722.6	1718.4	2348	2477	5996.2	7634.4	-
	Insomniac	No.1 (+)	2544	2253.2	4701.8	3060	8093.2	1208.6	1607.6	1645.2	2259	2354	5797	7824.8	-
	Insomniac	No.1 (+)	2545.8	2375.4	4692.6	3198.2	8971.2	1181	1606.4	1766.2	2207.6	2330.8	5788.2	7430.4	-
	Insomniac	No.1 (+)	2635.4	2319.6	4547	3289.8	9382.2	1227.8	1559.6	1788.6	2388.6	2576.6	6112.6	7572	-
	Insomniac	No.1 (+)	2844	2580.6	4970.6	3457.6	10030.4	1233.8	1668.8	1837.4	2380.2	2618	6084.2	7935.2	-
	Insomniac	No.1 (+)	2941	2461.4	5028	3584.2	10082.4	1274.6	1824.6	1794.8	2481.8	2763.6	6475.8	8250.6	-
	Insomniac	No.1 (+)	3040.2	2570.6	5277.2	3409.6	9901.6	1285.6	1688.6	1654.6	2381.8	2531.2	6131.4	8446.2	Insomnia
	Insomniac	No.1 (+)	2941	2534.6	4904.4	3555	10462.2	1244.4	1728.8	1810	2383.2	2541.2	5978.8	8149.8	Insomnia
	Insomniac	No.1 (+)	2972	2653.4	4900	3499.4	10024.4	1268.6	1781	1867.2	2405.4	2506.8	5993	8078.8	Insomnia
	Insomniac	No.1 (+)	2946	2369.6	4796.8	3272.6	9503.2	1206.6	1851	1704.8	2366.4	2577.4	6087	8243.8	Insomnia
	Insomniac	No.2 (+)	3007.6	2523.4	5605	3730.8	9203	1451.2	2003.6	2104.2	2709.6	2763.8	6507.2	8945.6	-
	Insomniac	No.2 (+)	2945.8	2393.8	5312	3467.8	7911.8	1300.6	2014.8	1913.4	2628.4	2711.8	6307.8	8009	-
	Insomniac	No.2 (+)	2833.2	2316.4	5124	3230.2	8097.6	1251.6	1930.8	1896	2491.6	2596.2	6100.6	7712.4	-
	Insomniac	No.2 (+)	3025.8	2492.6	5147.6	3578.6	8926	1262.2	1949.2	2019.8	2426	2669.4	6145.6	7366.8	-
	Insomniac	No.2 (+)	2962	2496.2	4964	3575	9393.6	1207	1874.6	1609.4	2646.4	2790.8	6120.6	7835.8	-
	Insomniac	No.2 (+)	3356	2700	5482.2	3822	9642.4	1292.8	2088	1943.6	2707	2973.8	6529.6	7909	-
	Insomniac	No.2 (+)	3472	2646.2	5385.6	3945.6	9507.8	1371.6	2298.6	2016.4	2786.6	3107.2	7061.8	8286.6	-
	Insomniac	No.2 (+)	3480.6	2828	5871	3711.6	9437	1359	2228	1956.6	2674.2	2914.6	6609	8603.8	Insomniac
	Insomniac	No.2 (+)	3512.8	2692.6	5317	3895.2	9825.6	1339.2	2177.4	1952.4	2680	2892.4	6124.4	8065.4	Insomniac
	Insomniac	No.2 (+)	3570.4	2803.2	5563.6	4048	9756	1331.6	2214.4	2037.4	2699.4	2897	6325.4	8322.2	Insomniac
	Insomniac	No.2 (+)	3324	2596.8	5286.2	3790.8	9134.8	1274.4	2146.2	1938.2	2606.6	3082	6509.8	8235.4	Insomniac
	Insomniac	No.3 (+)	2903.8	2542	5489	3942.6	9426	1403.6	1751.2	2063.4	2699.8	2566.8	6958	8440.8	-
	Insomniac	No.3 (+)	2859	2432	5237.2	3505.2	8150.8	1266.8	1869.2	1901	2581.6	2693	6806.4	7809.8	-
	Insomniac	No.3 (+)	2743.6	2395.4	5168.2	3444.8	8162.4	1253.6	1764.2	1875.4	2425	2536.8	6595	7711	-
	Insomniac	No.3 (+)	2805.8	2488.8	5240.8	3534.6	8945.4	1178.8	1688	2006.4	2357.6	2455.2	6332	7162.2	-
	Insomniac	No.3 (+)	2720.4	2535.4	5128.8	3574.6	9680.4	1054.2	1719.6	2135.4	2590.8	2833	6346.8	7737.8	-
	Insomniac	No.3 (+)	3047	2763	5738.4	3685.4	9675.8	1253	1765.8	1985.6	2624.4	2779.4	6485	7840.8	-
	Insomniac	No.3 (+)	3267.2	2679.6	5726.4	3990.6	9971.2	1281	2013	1970	2729.8	2818.6	6945.6	8221.4	-
	Insomniac	No.3 (+)	3230.8	2810.6	5702.2	3911.4	10509.6	1327.4	1936.6	1921.6	2718.8	2809.8	6766.8	8612.2	Insomniac
	Insomniac	No.3 (+)	3101.4	2818.6	5567.6	3886.2	9898.4	1330.6	1874.6	1944.4	2582	2709.8	6751.6	8087.4	Insomniac
	Insomniac	No.3 (+)	3303.4	2800.6	5720.6	3855.4	9907.4	1258.4	1892.6	2105.6	2549.4	2595	6604.8	8197.8	Insomniac
	Insomniac	No.3 (+)	2930.2	2547.2	5350.2	3684.6	9050.2	1249.6	1863.4	1873.8	2559.2	2681.6	6572	8980.4	Insomniac
	Insomniac	No.4 (+)	2471	2323.4	4582.2	3181.8	8469.2	1340.2	1447.2	1807.6	2268.6	2297.2	5896.8	8698	-
	Insomniac	No.4 (+)	2362.8	2204.8	4309.4	3574.4	7627.2	1189.4	1733.4	1720.6	2197.2	2304.6	5812	7377	-
	Insomniac	No.4 (+)	2277.4	2108.2	4153	2753	7611	1161	1428	1638.4	2048.4	2230.6	5372.6	7287.2	-
	Insomniac	No.4 (+)	2509.4	2234.8	4274.8	2924.4	8252.8	1141.6	1386	1659	1986.2	2119.2	5254.6	6980	-
	Insomniac	No.4 (+)	2531.4	2292.6	4371.6	3019	9200	1318.4	1466.6	1810.8	2168.6	2312.2	5551.6	7735	-
	Insomniac	No.4 (+)	2767.4	2415.6	4665.6	3173.6	9026.6	1210.6	1430.8	1648.6	2253.8	2359.2	5632.2	7841.2	-
	Insomniac	No.4 (+)	2816.4	2370.4	4506.8	3282.2	9169.6	1239.4	1582	1767	2362.8	2486.6	5853.6	8332.4	-
	Insomniac	No.4 (+)	3007.2	2369.4	4537.4	3090.6	9605.6	1536.4	1682	1605	2186.4	2348.2	5719.8	8066.2	Insomniac
	Insomniac	No.4 (+)	2991.4	2466.6	4691.6	3074	9710	1232.8	1541	1660.8	2223.6	2361.6	5614	8209.6	Insomniac
	Insomniac	No.4 (+)	2840.4	2580	4619	3267.4	9556.8	1194.6	1545.6	1824.8	2087.8	2304.6	5598	8195	Insomniac
	Insomniac	No.4 (+)	2502	2260.2	4317.2	3014	8523.8	1290.2	1553.4	1474.8	2113.4	2368	5194.4	9064.2	Insomniac

## Sheet: Dataset 5
	Dataset 5. Data-set matrix of the fluorescence intensity generated by the chemical nose after the addition of gut-derived bacteria (OD600 = 0.04) at three different pH values.
		pH 7.0						pH 5.0						pH 9.0
	Analytes	-None	-Dap	-Gly3	-Leu	-Phe	-Pht	-None	-Dap	-Gly3	-Leu	-Phe	-Pht	-None	-Dap	-Gly3	-Leu	-Phe	-Pht
	Species	Ch1	Ch1	Ch1	Ch1	Ch1	Ch1	Ch1	Ch1	Ch1	Ch1	Ch1	Ch1	Ch1	Ch1	Ch1	Ch1	Ch1	Ch1
	F.A.	547.6	583.4	620.4	619.2	1204	403.8	325.2	411.2	431	378	487	1558.6	784.8	526.2	462.6	1154.6	1651.6	385.8
	F.A.	604.2	653.8	711.8	707.4	1322.6	432.4	344.4	460.8	468.8	434	542.4	1837.6	652.4	581	549.4	1364.8	1845.8	430.6
	F.A.	534.8	584.4	646.4	645.8	1232	386.2	333.6	394.6	427	379.2	486	1403.4	526.4	500.2	466.8	1139.8	1608.6	376.4
	F.A.	610.6	644.6	717.6	706.2	1355.8	406.8	336.2	455.6	467.6	425.2	554.8	1640	617.2	563.8	542.6	1308.6	1832.2	413.8
	F.A.	559.4	574.2	638.4	636.4	1123.2	385.2	336.8	397.6	427.8	379.2	484.4	1400.8	540	502.4	438.2	1101.2	1580	359
	F.A.	598.6	642.4	705.2	690.8	1287	404.2	344.6	445.8	465	412.8	523.2	1617.6	586	564.8	540.6	1306.2	1786	417.2
	F.C.	1058.8	998.8	1018	1156	1317.2	675.2	930	1025	784.4	923.2	1112.8	1925.6	1039.6	677.4	550.4	1348.8	1868.8	698.4
	F.C.	1081.2	994	1096.2	1284.8	1442.4	716.2	957	1057.6	811.2	948.4	1154.6	2094.2	1016	708.4	593.4	1486.2	2072.2	725.4
	F.C.	1020.6	947.8	954.2	1144.6	1292	611	880.4	928.2	725	859.6	1041.2	1653.2	940.6	618.2	520.4	1291.6	1851.2	616.6
	F.C.	1010.8	984.2	1071.2	1273.6	1373.8	663.2	882	991.8	777	887.4	1085.6	1795.4	983	670.8	556.4	1433.4	1984	673
	F.C.	1024.2	956.6	994.4	1154.8	1218.6	623.8	888.8	958.2	723.4	877.6	1046.8	1699	963.6	605.8	522.4	1290.8	1764.8	654.4
	F.C.	987.8	966.8	1039	1230.2	1334.8	666.2	928	997.6	764.6	897.4	1078.4	1828.8	939.2	673.8	575.8	1424	1935	662
	P.E.1	505.6	559.2	697.2	767.8	1561.4	535.4	338.8	474	515.2	498.4	676.2	1934.8	541.6	500.4	576	1319.2	2089	532.2
	P.E.1	498	600.8	684.4	742	1548.2	527.4	334.4	455	479.6	463.8	657.2	2083	497.4	578	587	1425.4	2089.2	519.2
	P.E.1	467.6	521.2	663.6	707	1503.4	501.6	311	445.8	502.2	465	637.8	1759.6	514.8	461.6	534.2	1274.6	2003	507.6
	P.E.1	485	577.4	656.8	761.4	1529.2	515.4	317.2	458.2	470.2	448.6	645	1910.2	536.8	565.8	666.6	1367.4	2076.2	523
	P.E.1	474.6	546.8	688.6	723.6	1430.2	507.2	327.6	465	528.6	474.6	634.6	1787.4	488.8	456.6	540	1271.4	1925.6	499.8
	P.E.1	497	567	662.6	747.6	1491.8	525.2	329.8	465	470.4	457.2	626.8	1855.6	497.8	568.2	580.2	1313.8	2038.8	505
	P.E.2	696.4	734.6	886	1097.2	1549.4	678.6	653.2	756.4	755.6	796.4	1099.2	2178	688.8	476	588	1352	2086.2	697.8
	P.E.2	719.2	790	904.2	1103.6	1519.2	704	639.4	769.8	773	845.4	1125.4	2293.6	701.6	583.4	618.4	1427.2	2175.8	741.2
	P.E.2	672	698.2	856.8	1064.8	1527	670.2	644.2	736.6	737.4	769.8	1067	2080.6	632	610.4	590.2	1294.2	2074.2	661
	P.E.2	666.4	758.8	881	1058.8	1516.2	675.8	619	757.8	728	808.2	1110.8	2184.6	641.2	535.6	608.6	1413	2112	682.2
	P.E.2	654	717.8	870.8	1055.6	1489.8	673.6	628.2	747.8	748.6	767.2	1019.8	2017.4	648.2	462.4	596	1309.6	1994.6	830.8
	P.E.2	657	762.6	889.2	1065.8	1426.8	684.4	614.4	754.4	756.4	783.6	1033.6	2097.6	603	527.6	601.2	1355.8	2140.2	687
	A.B.1	987.8	919.6	1042.8	1128.4	1397.4	607.6	921.2	910.4	943.8	910.6	1015.2	2032.8	1014.4	619.8	594	1408.4	1904.4	578.4
	A.B.1	1039.4	921.8	1113.8	1144.4	1545	625.8	879.2	951.6	974.6	916.4	1059.6	2340.2	935.4	654.8	593	1476.4	2010.6	668.2
	A.B.1	939.2	903	1053.4	1094.6	1381.6	646.2	910.6	921.4	956.2	890	980.6	1909.2	851.8	608	570	1334.8	1847.6	640
	A.B.1	1011	914.2	1056.8	1126.6	1558.6	590.4	874.2	930	981.2	920.8	1008.2	2079.6	807.2	635	620.6	1437	2032	630.6
	A.B.1	952.4	868.2	1040.4	1083	1349.8	586.4	871.2	886.8	929	882.4	993.8	1902	815.8	583	565.4	1327.2	1804.2	589
	A.B.1	1030.2	902	1048.8	1129.2	1431	604.4	873.2	936.8	951	877	1008.4	1924.4	867.2	596.4	622	1419	1995.4	609
	A.B.2	601.4	480.6	470.2	475.6	1466.2	560.4	349.8	432	381.6	327.4	539	2069	659	590.6	576.4	1417.6	2114.8	568.4
	A.B.2	661.2	529.8	522.4	514.6	1579	624.2	351.6	478	386.8	356.6	556.8	2221	601.6	636	619.6	1560	2210.8	636.4
	A.B.2	610.2	487.4	471.6	489.6	1472.4	582.4	365	438	382.6	333.2	549.8	1894.4	594.4	563	571	1368.4	2012.2	557.8
	A.B.2	619	505.8	475.8	448.6	1543.6	595.4	335.2	444.4	373.8	322.6	527.8	2043.2	609.8	592	615.8	1498.8	2162.6	550
	A.B.2	580.2	465	453.2	453	1447.8	553.2	338.4	425.4	383	325	519.8	1863	573.2	549	574.2	1385.2	2012.4	545.2
	A.B.2	607.8	485.8	530.6	458.8	1532.8	567.8	329	433.2	371.6	325	509.6	1989.4	573.8	591.4	630	1523.4	2180.6	559
	B.B.1	854.6	1189.8	1405.4	1294	1096	987	851.6	750.2	851	854	996.8	2343.8	737.6	892.2	636.2	1425.2	1810.6	1075.2
	B.B.1	906.6	1184	1399.2	1258.2	1128.4	1018.4	859.2	779.6	874.2	860.2	892.4	2395.6	683.6	880.6	684	1489.8	1881.2	1129.8
	B.B.1	857.4	1157.2	1408.2	1232.8	1082.8	962	819.8	755.4	849	849.8	990.4	2107.4	662.8	827.8	620.6	1365.2	1619.4	1058.8
	B.B.1	866.6	1131.2	1362.2	1225.2	1100.4	973.8	840	749	875.8	868.4	936.4	2149	664	848.8	674.2	1457.4	1876	1035.2
	B.B.1	849.6	1169.8	1391.4	1177.6	1074	989.8	813.8	727.4	840.2	824	955.8	2195.8	676.4	819.6	598.2	1357.8	1732	1056
	B.B.1	1043	1355	1557.6	1372.2	1214.8	1065.6	950.2	830.6	939	899.6	1083	2567.2	822	950.8	661.2	1527.2	1941.6	1197.6
	B.B.2	843	971	1268	1077.6	932.4	2145.8	1049.8	1405.8	1490.8	1234.8	1170.6	3033.6	658.6	1065.6	691	1565.2	1251	1968.2
	B.B.2	765.8	1026.4	1321	1116.6	938.2	2164.8	1014.2	1451.8	1507	1277.4	1132.4	3111.4	557.6	1013.4	701.4	1520.6	1293.4	1934
	B.B.2	793.8	962	1251.8	1050.4	906	2053.6	966	1308.8	1398	1182.2	1122.8	2818.8	580.2	965.4	691.2	1528.2	1249.4	1926.2
	B.B.2	780	980.6	1281.2	1058.6	933.4	2059.2	945.6	1430.2	1457.2	1241.2	1106.8	2855.4	585.4	994.2	684.4	1486.2	1242.2	1858.4
	B.B.2	804.8	976.8	1252.4	1085.6	923.4	2077	1082	1328.4	1411.2	1247.6	1131.2	2782.8	581.6	1126.2	669.8	1537.6	1186.6	1880.4
	B.B.2	906	1084.6	1393.6	1184.2	1077	2207.4	1176.8	1512.2	1608.2	1375.6	1399.4	3357.2	681.8	1093.6	723	1635.6	1448	2074.4

## Sheet: Dataset 6
	Dataset 6. Data-set matrix of the fluorescence intensity of the same experiment carried out on different dates generated by the chemical nose after the addition of gut-derived bacteria (OD600 = 0.04). The rightmost column indicates whether the data in the corresponding row was used as training data (denoted by “–”) or test data (results of the verification are shown) in the holdout test.
			pH 7.0						pH 5.0						Verification by Holdout test
	Analytes	Experiment	-None	-Dap	-Gly3	-Leu	-Phe	-Pht	-None	-Dap	-Gly3	-Leu	-Phe	-Pht
	Species		Ch1	Ch1	Ch1	Ch1	Ch1	Ch1	Ch1	Ch1	Ch1	Ch1	Ch1	Ch1
	F.A.	E1	717.8	752.6	801	788.4	1350	458.8	433	491.6	531.8	468.2	634.8	1661.8	-
	F.A.	E1	743	754.2	847.8	833.6	1498.2	494.6	413	512.4	556.4	485.2	630	1907.4	-
	F.A.	E1	681.4	697.6	768	784.6	1156.8	451.2	426	475.4	521.2	458.2	579.4	1542.4	-
	F.A.	E1	710.2	785.6	848.6	823.4	1309.8	468.8	407	510.6	569	492	638.8	1760.6	-
	F.A.	E1	737.4	718.2	762.2	774.2	1308.6	439.8	372	472	515.8	451.6	589.4	1572.6	-
	F.A.	E1	808	804.4	851.2	855.2	1399	464.2	416.4	539.4	566	495.2	640	1831.2	-
	F.C.	E1	1253.4	1093.2	1143.6	1301.6	1445	680.6	972.6	1020.8	827.2	964	1199.2	1917.4	-
	F.C.	E1	1248.8	1123.6	1231.6	1383	1530.6	973.2	1070.4	1132.8	923.2	1035.6	1262.4	2164.6	-
	F.C.	E1	1223.2	1086.6	1149.4	1316.6	1350	693	1030.2	1027.2	842	1005	1174	1978	-
	F.C.	E1	1136	1079.8	1249.8	1435.2	1533	748.8	1077.6	1107.2	903.8	1012.8	1255	2163.6	-
	F.C.	E1	1313	1142	1140.6	1331	1453	704.4	1005.2	1012.2	823.2	963.8	1167.6	1943.2	-
	F.C.	E1	1254.4	1110.8	1222.2	1417.2	1520.6	735.4	1022.8	1060.4	877.2	975.4	1153	2158.6	-
	P.E.1	E1	618.4	643.8	793.6	855	1645.4	579	374.2	516.4	561.6	529.4	757.6	2010.8	-
	P.E.1	E1	590	648.6	777.2	860.2	1637.8	577.4	371.8	506.6	708.4	505	738.6	2071.8	-
	P.E.1	E1	627.6	641	795.6	855.2	1517.8	595.6	377.2	511.4	565.8	529.2	735	2038.2	-
	P.E.1	E1	617	638.8	776.8	864	1606.2	623.2	369.4	523.6	528.4	508.6	763.6	2106.6	-
	P.E.1	E1	669.2	661.8	812.2	865.8	1671.8	599.2	373.4	524.2	562.4	535.4	714.4	2090.2	-
	P.E.1	E1	670.6	677	783.4	880	1695.6	617.4	383.4	516.6	542.8	514.8	745.2	2138	-
	P.E.2	E1	763.8	799	1000.6	1155.2	1714.2	742	694.2	790.6	818.8	835.2	1193.2	2375.4	-
	P.E.2	E1	775.8	792.6	1073.6	1153.2	1643	736.8	693.2	796.6	835.8	859.4	1194	2403.6	-
	P.E.2	E1	751.2	783.2	1027.4	1152.4	1593.6	763	695.4	806.6	803.8	819.2	1144.8	2434	-
	P.E.2	E1	753.4	835.8	1034	1168.4	1585.8	749.4	681.6	799	831.2	853	1194.2	2506.4	-
	P.E.2	E1	833.2	807.4	1026.8	1199.4	1643.6	751.8	709.2	825.2	825.4	818.6	1201	2352.4	-
	P.E.2	E1	798	836.6	1064	1165.6	1626.4	711.2	649	796	831	870.2	1213.4	2349.6	-
	A.B.1	E1	1081	963.2	1146	1162	1611.4	612.6	891.8	920.2	994.8	964.4	1117.4	2086.6	-
	A.B.1	E1	1155.2	1074.4	1277	1273.6	1605.6	658.2	961.8	1049.8	1126.4	995.8	1198.6	2240.8	-
	A.B.1	E1	1098	1010.8	1171.8	1200	1445.6	628	959.8	958.8	1021.6	948.4	1112.6	2188.8	-
	A.B.1	E1	1067.8	1047	1212.4	1257.4	1576.2	637.4	941.8	999.4	1066.8	976.4	1149	2334	-
	A.B.1	E1	1139	1034.4	1190.8	1240	1504	629	940.6	954.4	1027.8	942.4	1135.4	2038.8	-
	A.B.1	E1	1165.2	1070.2	1191.4	1269.2	1592	617.6	876	1003.2	1061.8	973.8	1114.4	2177.2	-
	A.B.2	E1	767.8	561.4	554.6	554	1565.6	669	419.2	507.8	440.2	372.6	678.4	2189	-
	A.B.2	E1	759.4	599	588.2	576	1694.2	689.8	417.8	516.6	442.4	382.8	655.8	2311.6	-
	A.B.2	E1	796.6	609	610	623	1519	703.2	459.6	523	460	410.4	687	2349.8	-
	A.B.2	E1	742.2	609.6	590.6	608	1734.8	698.2	417.2	525	457.6	391.6	647.4	2467	-
	A.B.2	E1	869.6	634.6	608.2	615.8	1561.8	680	450.2	542	459.2	400.8	678.4	2225.4	-
	A.B.2	E1	813.2	630.2	586.8	571.4	1658.8	648.4	403.8	504.4	434.6	378.4	639.6	2278.8	-
	B.B.1	E1	950.6	1319.8	1634.6	1444.2	1271.4	1053.2	920.6	813	952.4	904.4	1123.6	2418.2	-
	B.B.1	E1	952	1339.2	1603.2	1366.8	1266.8	1056.6	938.4	837.4	985.6	928.4	1101	2495.2	-
	B.B.1	E1	957.6	1339.2	1619.4	1434.2	1192.8	1070.8	952.6	837.4	958.2	922.6	1091	2491.6	-
	B.B.1	E1	953.2	1261.2	1617.6	1392.6	1208.8	1052.8	927.2	834	974.6	941.4	1087.8	2509.2	-
	B.B.1	E1	1130.2	1364.2	1633.6	1416.8	1176.8	1028	937	826.4	953.4	928.6	1047.4	2343.2	-
	B.B.1	E1	1053.4	1308.2	1608.8	1405.2	1156	1047.2	968.4	846.2	967	926	1047.2	2372.6	-
	B.B.2	E1	937.2	1152.4	1532.2	1221.6	1110.6	2208	1158	1554.4	1716.4	1447.8	1420.8	3346.8	-
	B.B.2	E1	904.2	1153.2	1532	1213	1121.2	2282	1099.4	1576.2	1789.8	1439.8	1389.2	3387.8	-
	B.B.2	E1	921.8	1138.8	1477.4	1236.4	1054.8	2296.8	1146	1562	1707	1428.2	1357.8	3412	-
	B.B.2	E1	871.6	1125.8	1504.2	1255.8	1109.4	2271	1095.8	1631.6	1754.2	1426.2	1343.4	3443.6	-
	B.B.2	E1	959.8	1146	1442.4	1246.8	1022.2	2163.2	1139.8	1513.8	1717.4	1336.2	1296.8	3204	-
	B.B.2	E1	917	1122.4	1461	1265.6	1014.8	2121.8	1004	1523.2	1686.2	1389.8	1282.6	3232	-
	F.A.	E2	547.6	583.4	620.4	619.2	1204	403.8	325.2	411.2	431	378	487	1558.6	F.A.
	F.A.	E2	604.2	653.8	711.8	707.4	1322.6	432.4	344.4	460.8	468.8	434	542.4	1837.6	F.A.
	F.A.	E2	534.8	584.4	646.4	645.8	1232	386.2	333.6	394.6	427	379.2	486	1403.4	F.A.
	F.A.	E2	610.6	644.6	717.6	706.2	1355.8	406.8	336.2	455.6	467.6	425.2	554.8	1640	F.A.
	F.A.	E2	559.4	574.2	638.4	636.4	1123.2	385.2	336.8	397.6	427.8	379.2	484.4	1400.8	F.A.
	F.A.	E2	598.6	642.4	705.2	690.8	1287	404.2	344.6	445.8	465	412.8	523.2	1617.6	F.A.
	F.C.	E2	1058.8	998.8	1018	1156	1317.2	675.2	930	1025	784.4	923.2	1112.8	1925.6	F.C.
	F.C.	E2	1081.2	994	1096.2	1284.8	1442.4	716.2	957	1057.6	811.2	948.4	1154.6	2094.2	F.C.
	F.C.	E2	1020.6	947.8	954.2	1144.6	1292	611	880.4	928.2	725	859.6	1041.2	1653.2	F.C.
	F.C.	E2	1010.8	984.2	1071.2	1273.6	1373.8	663.2	882	991.8	777	887.4	1085.6	1795.4	F.C.
	F.C.	E2	1024.2	956.6	994.4	1154.8	1218.6	623.8	888.8	958.2	723.4	877.6	1046.8	1699	F.C.
	F.C.	E2	987.8	966.8	1039	1230.2	1334.8	666.2	928	997.6	764.6	897.4	1078.4	1828.8	F.C.
	P.E.1	E2	505.6	559.2	697.2	767.8	1561.4	535.4	338.8	474	515.2	498.4	676.2	1934.8	P.E.1
	P.E.1	E2	498	600.8	684.4	742	1548.2	527.4	334.4	455	479.6	463.8	657.2	2083	P.E.1
	P.E.1	E2	467.6	521.2	663.6	707	1503.4	501.6	311	445.8	502.2	465	637.8	1759.6	P.E.1
	P.E.1	E2	485	577.4	656.8	761.4	1529.2	515.4	317.2	458.2	470.2	448.6	645	1910.2	P.E.1
	P.E.1	E2	474.6	546.8	688.6	723.6	1430.2	507.2	327.6	465	528.6	474.6	634.6	1787.4	P.E.1
	P.E.1	E2	497	567	662.6	747.6	1491.8	525.2	329.8	465	470.4	457.2	626.8	1855.6	P.E.1
	P.E.2	E2	696.4	734.6	886	1097.2	1549.4	678.6	653.2	756.4	755.6	796.4	1099.2	2178	P.E.2
	P.E.2	E2	719.2	790	904.2	1103.6	1519.2	704	639.4	769.8	773	845.4	1125.4	2293.6	P.E.2
	P.E.2	E2	672	698.2	856.8	1064.8	1527	670.2	644.2	736.6	737.4	769.8	1067	2080.6	P.E.2
	P.E.2	E2	666.4	758.8	881	1058.8	1516.2	675.8	619	757.8	728	808.2	1110.8	2184.6	P.E.2
	P.E.2	E2	654	717.8	870.8	1055.6	1489.8	673.6	628.2	747.8	748.6	767.2	1019.8	2017.4	P.E.2
	P.E.2	E2	657	762.6	889.2	1065.8	1426.8	684.4	614.4	754.4	756.4	783.6	1033.6	2097.6	P.E.2
	A.B.1	E2	987.8	919.6	1042.8	1128.4	1397.4	607.6	921.2	910.4	943.8	910.6	1015.2	2032.8	A.B.1
	A.B.1	E2	1039.4	921.8	1113.8	1144.4	1545	625.8	879.2	951.6	974.6	916.4	1059.6	2340.2	A.B.1
	A.B.1	E2	939.2	903	1053.4	1094.6	1381.6	646.2	910.6	921.4	956.2	890	980.6	1909.2	A.B.1
	A.B.1	E2	1011	914.2	1056.8	1126.6	1558.6	590.4	874.2	930	981.2	920.8	1008.2	2079.6	A.B.1
	A.B.1	E2	952.4	868.2	1040.4	1083	1349.8	586.4	871.2	886.8	929	882.4	993.8	1902	A.B.1
	A.B.1	E2	1030.2	902	1048.8	1129.2	1431	604.4	873.2	936.8	951	877	1008.4	1924.4	A.B.1
	A.B.2	E2	601.4	480.6	470.2	475.6	1466.2	560.4	349.8	432	381.6	327.4	539	2069	A.B.2
	A.B.2	E2	661.2	529.8	522.4	514.6	1579	624.2	351.6	478	386.8	356.6	556.8	2221	A.B.2
	A.B.2	E2	610.2	487.4	471.6	489.6	1472.4	582.4	365	438	382.6	333.2	549.8	1894.4	A.B.2
	A.B.2	E2	619	505.8	475.8	448.6	1543.6	595.4	335.2	444.4	373.8	322.6	527.8	2043.2	A.B.2
	A.B.2	E2	580.2	465	453.2	453	1447.8	553.2	338.4	425.4	383	325	519.8	1863	A.B.2
	A.B.2	E2	607.8	485.8	530.6	458.8	1532.8	567.8	329	433.2	371.6	325	509.6	1989.4	A.B.2
	B.B.1	E2	854.6	1189.8	1405.4	1294	1096	987	851.6	750.2	851	854	996.8	2343.8	B.B.1
	B.B.1	E2	906.6	1184	1399.2	1258.2	1128.4	1018.4	859.2	779.6	874.2	860.2	892.4	2395.6	B.B.1
	B.B.1	E2	857.4	1157.2	1408.2	1232.8	1082.8	962	819.8	755.4	849	849.8	990.4	2107.4	B.B.1
	B.B.1	E2	866.6	1131.2	1362.2	1225.2	1100.4	973.8	840	749	875.8	868.4	936.4	2149	B.B.1
	B.B.1	E2	849.6	1169.8	1391.4	1177.6	1074	989.8	813.8	727.4	840.2	824	955.8	2195.8	B.B.1
	B.B.1	E2	1043	1355	1557.6	1372.2	1214.8	1065.6	950.2	830.6	939	899.6	1083	2567.2	B.B.1
	B.B.2	E2	843	971	1268	1077.6	932.4	2145.8	1049.8	1405.8	1490.8	1234.8	1170.6	3033.6	B.B.2
	B.B.2	E2	765.8	1026.4	1321	1116.6	938.2	2164.8	1014.2	1451.8	1507	1277.4	1132.4	3111.4	B.B.2
	B.B.2	E2	793.8	962	1251.8	1050.4	906	2053.6	966	1308.8	1398	1182.2	1122.8	2818.8	B.B.2
	B.B.2	E2	780	980.6	1281.2	1058.6	933.4	2059.2	945.6	1430.2	1457.2	1241.2	1106.8	2855.4	B.B.2
	B.B.2	E2	804.8	976.8	1252.4	1085.6	923.4	2077	1082	1328.4	1411.2	1247.6	1131.2	2782.8	B.B.2
	B.B.2	E2	906	1084.6	1393.6	1184.2	1077	2207.4	1176.8	1512.2	1608.2	1375.6	1399.4	3357.2	B.B.2

## Sheet: Dataset 7
	Dataset 7. Data-set matrix of the fluorescence intensity generated by the chemical nose after the addition of Escherichia coli strains. The rightmost column indicates whether the data in the corresponding row was used as training data (denoted by “–”) or test data (results of the verification are shown) in the holdout test.
		pH 7.0						pH 5.0						Verification by Holdout test
	Analytes	-None	-Dap	-Gly3	-Leu	-Phe	-Pht	-None	-Dap	-Gly3	-Leu	-Phe	-Pht
		Ch1	Ch1	Ch1	Ch1	Ch1	Ch1	Ch1	Ch1	Ch1	Ch1	Ch1	Ch1
	DH5α	2487	2285.4	3221.2	3405	7699.2	2513.8	1595.6	1655.6	1993.4	1944.4	3163.4	8773.4	-
	DH5α	2542.8	2156.6	3079	3349	7792.4	2267.2	1391.4	1360.4	1869.8	1810.2	3048.6	8479	-
	DH5α	2460.2	1938	2813.6	2981.6	6916	2366.6	1445.6	1439	1992.8	1726.8	2849.2	8394.6	-
	DH5α	2487.4	1910	2816.4	2994	7477.6	2154.8	1459.2	1448.8	2058	1691.6	2825	7780	-
	DH5α	2449	1908.8	2774.2	3059.2	7430	2266.8	1431.6	1414.4	1944.8	1674.8	2890.2	8077.2	-
	DH5α	2508	1933.4	2827.2	3063.4	7233.8	2314.6	1484.8	1465	2052	1726.4	2825.6	7828.8	-
	DH5α	2457.8	1907.8	2826.4	3047	7151.4	2263.2	1477.4	1447.6	2043.6	1716.4	2722.6	8074.6	DH5α
	DH5α	2623	2077.2	2992	3233.6	7590	2375.2	1500.4	1501	2068.2	1792.6	2917.4	8696	DH5α
	DH5α	2588.8	1954.2	2948.4	3080.6	7328	2312.6	1435.2	1399.2	1946.4	1667.8	2743.4	7766.6	DH5α
	DH5α	2526.2	1833.6	2860.2	2975.4	7353.2	2212	1417.4	1438.8	1855.6	1618	2665.8	7816.2	DH5α
	JM109	2034	2360.8	2708.2	3028.8	8467	1841.6	1399.2	1491.2	1845.6	1718.8	2733.8	8261.8	-
	JM109	2016.8	2254.2	2631.6	2983.4	8367.8	1760.2	1293	1413	1772.8	1580.6	2591.8	8137.8	-
	JM109	1936.4	2025.2	2449.4	2768.8	7793.6	1700	1259.4	1311.4	1531.2	1387.6	2144.6	7176.4	-
	JM109	1881.2	2045.2	2480.2	2766.8	7975.4	1693.8	1306.2	1357.4	1703.8	1547.8	2571.2	7595.8	-
	JM109	1881.8	1999.4	2407.2	2772	7928.2	1648.8	1217.8	1362.4	1688.8	1541	2587.4	7707.8	-
	JM109	1901	2062	2476.2	2760.6	7805	1715.2	1304.4	1377.2	1723.4	1574.2	2726.6	7783.6	-
	JM109	1969	2014.4	2404.6	2742.8	7898	1648	1232.4	1306.2	1738.6	1555	2630.4	7624.8	JM109
	JM109	2398.6	2243.6	2625	2949	8328.6	1759.6	1324.2	1378.2	1787.8	1593.4	2634.4	8545.2	JM109
	JM109	2002.8	2043.2	2404	2715.4	7938.8	1691	1227.2	1334	1682.4	1554	2413.2	7725.2	JM109
	JM109	1915.6	2035.8	2344.4	2672.6	8024.8	1629.2	1194	1362.4	1621.8	1484.4	2363	7973.2	JM109
	BL21 (DE3) pLysS	3863.4	3417.2	3921.6	4213.6	9218	4021	2024.2	1816.2	2301	2186.4	3212.4	9308.6	-
	BL21 (DE3) pLysS	3933	3448.2	3862.8	4104.2	9067.2	3947	2076.6	1738.2	2244.8	2119.4	3061.2	8967.2	-
	BL21 (DE3) pLysS	3532.4	3133.6	3642.8	3891.8	8398.4	3706.8	1992	1691.6	2199	2073.8	2925.4	9064.6	-
	BL21 (DE3) pLysS	3300.4	2992.2	3435.2	3691.8	8545	3521.4	1894	1659.4	2119.8	1893.4	2758.8	8423.8	-
	BL21 (DE3) pLysS	3640	3190.4	3730.4	4070.2	8451.4	3877	2008.6	1648.2	2038.6	2008	2895	8435	-
	BL21 (DE3) pLysS	3524.2	3025.8	3554.4	3786	8288.4	3584.4	1964.6	1650.8	2079	1975.6	2916.6	8663.8	-
	BL21 (DE3) pLysS	3486	3047.6	3516	3862	8269.8	3590.4	1867.4	1663.6	2050.4	1976.4	2738.4	8457.4	BL21 (DE3) pLysS
	BL21 (DE3) pLysS	3917	3261.6	3792.6	4188.8	8903.4	4148.8	2143.8	1817.2	2253.2	2124.4	3150.2	7943	BL21 (DE3) pLysS
	BL21 (DE3) pLysS	3793.6	3061	3548.8	4098.2	8833.4	3940.2	2070	1732.6	2150	2123.4	2836	8806.8	BL21 (DE3) pLysS
	BL21 (DE3) pLysS	3424.2	2917.2	3461.8	3695.2	8807	3621.4	1821	1585	1951.8	1802.2	2520.4	8255.2	BL21 (DE3) pLysS
	Rosetta2 (DE3)	1989	2430.2	2657.6	2608.2	8692.8	2109	1451.2	1551.2	1930.4	1781	2734.4	8646.4	-
	Rosetta2 (DE3)	2251.8	2447.6	2668.6	2721.6	8636.6	2232.6	1593.4	1604.8	1921.6	1717.6	2604	8550.6	-
	Rosetta2 (DE3)	1853.4	2193	2315	2361.8	7548.4	1873.2	1359.6	1438.8	1740.8	1594.2	2439.8	8272.2	-
	Rosetta2 (DE3)	2169.2	2372.2	2589.2	2689.2	8191.4	2258	1626.8	1563	1854.4	1758.4	2720	8341.4	-
	Rosetta2 (DE3)	2221.8	2355	2606	2676.6	8070.2	2285.8	1587.4	1571.2	1859.6	1718.6	2609.6	8213.2	-
	Rosetta2 (DE3)	2231.6	2396.8	2559	2594.6	7945.4	2221.6	1615.6	1593.6	1888.8	1774.4	2729.8	8301.4	-
	Rosetta2 (DE3)	2203.8	2310.2	2435.6	2535.4	7848.6	2049.4	1489	1503.2	1777.4	1656.8	2526.6	8133	Rosetta2 (DE3)
	Rosetta2 (DE3)	2138.2	2367.8	2543.6	2586.6	8293	2121.8	1592.4	1570.4	1846.4	1691.6	2635.4	8769	Rosetta2 (DE3)
	Rosetta2 (DE3)	2166.6	2313.2	2598.6	2595.8	7834.2	2170	1371.4	1443	1785.2	1675.8	2377.6	8186	Rosetta2 (DE3)
	Rosetta2 (DE3)	2145.6	2980.8	2449.8	2517	7999.8	2118.4	1389.2	1504.2	1825.2	1604.8	2386	8066.2	Rosetta2 (DE3)
	Origami2 (DE3)	2946.8	2801.4	3024	3423.4	8826.6	2173.6	2198.2	2157	2386	2183.2	3838.4	19313	-
	Origami2 (DE3)	2988.2	2774	2978.2	3446.2	8444	2189.2	2254.8	2119.6	2314.2	2200	3736	8545.6	-
	Origami2 (DE3)	2806.8	2574.6	2741.4	3263.8	7823	2127.2	2103.6	1982.6	2162.4	2065.2	3577	4350.8	-
	Origami2 (DE3)	2819.4	2647.6	2773	3195.4	7999.8	2054.8	2118.4	1978	2165.6	2036.2	3526	8299.2	-
	Origami2 (DE3)	2746.2	2593.8	2728.6	3253.6	7599.8	2026	2543.6	1949.8	2140.8	1996.8	3504.8	8280	-
	Origami2 (DE3)	2718.8	2594.6	2731.4	3172.8	7868.4	2041.6	2150.6	1933.2	2118.6	2034.2	3504.6	8170.4	-
	Origami2 (DE3)	2692.4	2648.4	2617.8	3115.8	7796	2055.6	2038.8	1909	2113	1988.4	3459.2	7905.6	Origami2 (DE3)
	Origami2 (DE3)	2947.8	2706.2	2889.2	3428	8315.2	2136.2	2255.8	2082	2269.4	2114.6	3684	8693.2	Origami2 (DE3)
	Origami2 (DE3)	2696.6	2666.6	2654.4	3128	7471	1995.8	1787.8	1842.8	2080.8	1936.6	3246.2	8275	EPI300
	Origami2 (DE3)	2660.8	2783.8	2648.6	2942	7509.8	1928	1809	1858.8	2063.8	1903.4	3146.8	8238.8	EPI300
	top10	2704.2	2878.6	3217.6	3578	8021.8	2467	2453.6	2290	2765	2740.8	4421	8881	-
	top10	2637.4	2899.6	3117.6	3587.2	7726.6	2453.8	2389.8	2293.6	2686.6	2615.6	4284.4	8585.8	-
	top10	2430.6	2672.8	2888.4	3443.6	7266.6	2374.4	2295.6	2164.4	2566.8	2545	4052.4	8292	-
	top10	2515.6	2746	2894.6	3392	7349.6	2369.8	2377.4	2199.8	2582	2542.2	4032.8	8354.4	-
	top10	2430.6	2680.4	2852.8	3377.8	7347.4	2385.6	2352	2213.6	2530.8	2516	4080.6	8518.4	-
	top10	2444.6	2690	2831.8	3250.4	7477.2	2373.2	2343.8	2204.4	2496.8	2483.6	4015.8	8235.4	-
	top10	2474.6	2632	2781.8	3150.2	7192	2304.8	2113.2	2064	2476.8	2422.4	3959	8279.2	top10
	top10	2641.2	2768.2	2980.8	3555	7695.4	2507.2	2418	2326	2689.8	2631.2	4284	8794.4	top10
	top10	2486	2719.4	3013.6	3242	7423.4	2589.6	2109.4	2148.2	2509.2	2399.8	3914.8	8847.4	top10
	top10	2354	2721.4	2911	3157	7406.8	2427.6	2113.8	2167.4	2464.2	2337.8	3836	8441.4	top10
	Rosetta-gami B (DE3)	2242.2	2281	2608.6	2555.2	8660	2014	1568.2	1528.4	1895.4	1680.6	2563.2	8450.2	-
	Rosetta-gami B (DE3)	2239.2	2316.4	2598.8	2507.6	8579.2	2057.4	1622	1502	1822	1646.4	2558.4	8443.6	-
	Rosetta-gami B (DE3)	2089.6	2097.4	2421.6	2314.2	7986.6	1858.2	1540.6	1470	1720.8	1630.4	2414.2	8328.4	-
	Rosetta-gami B (DE3)	2185.4	2250.4	2440.6	2424.8	7978.4	2050.2	1554	1450.6	1749	1618.2	2437.6	7911.6	-
	Rosetta-gami B (DE3)	2132.6	2210.2	2429.8	2417.4	7764.6	1926.6	1571.6	1464.6	1744.4	1572.2	2437.2	8194.4	-
	Rosetta-gami B (DE3)	2178.2	2187.4	2431.4	2357.6	8001.8	1935.2	1597.6	1472	1753.2	1606.6	2434.6	7966	-
	Rosetta-gami B (DE3)	2138.8	2205.8	2433.8	2449.2	7686.4	1913.8	1564.8	1453	1736.6	1579.2	2402.2	7880.6	Rosetta-gami B (DE3)
	Rosetta-gami B (DE3)	2336.2	2296.8	2572.4	2560.6	8328.8	2079.8	1708.4	1528.6	1801.2	1676.4	2678.2	8601.6	Rosetta-gami B (DE3)
	Rosetta-gami B (DE3)	2120.4	2297.4	2455.4	2424.4	7737.6	1972.8	1449.2	1457.4	1736.2	1574.8	2332.4	8293.6	Rosetta-gami B (DE3)
	Rosetta-gami B (DE3)	2101.8	2276.2	2464.6	2472	7781.8	1983	1427.6	1451.6	1727.2	1536.2	2179	7923.8	Rosetta2 (DE3)
	EPI300	2509.4	2648	3002	3193.8	7680.6	2035.6	1911.4	2003.8	2395	2347.4	3832.6	8260.4	-
	EPI300	2479.8	2601.2	2704.4	3123.2	7858.2	1979.4	1829.8	1973	2213.4	2195.6	3571.8	8446.8	-
	EPI300	2262	2429.2	2503.8	2793.2	7130	1837.8	1700.2	1848.6	2117	2065.6	3414.2	8079.4	-
	EPI300	2341.2	2414.6	2533	2939	7341.6	1851.8	1685.2	2286.2	2094.4	2055.6	3301	7828.2	-
	EPI300	2299.6	2438.6	2543.4	2857	7339	1876.4	1726.8	1845.4	2122.8	2031	3407.2	8107	-
	EPI300	2268.8	2438.2	2523	2862.8	7445.2	1880.6	1713.4	1875.8	2148	2064.4	3472.8	8067.6	-
	EPI300	2342	2444.6	2561.4	2881.8	7248.8	1975.4	1789.8	1848.6	2111.2	2056.2	3465.4	7901.4	EPI300
	EPI300	2468.6	2562.6	2722.8	3054.8	7955.6	1950.4	1761	1858	2173	2108	3492.2	8328	EPI300
	EPI300	2247.8	2396.2	2639	2873.8	7286.4	1954.6	1636.2	1786	2104.2	2034.2	3316.4	8027.2	EPI300
	EPI300	2183.8	2412.6	2449.8	2787.4	7407.4	1829.2	1587.8	1795.6	1985	1921.4	3113.2	7938.6	EPI300

## Sheet: Dataset 8
	Dataset 8. Data-set matrix of the fluorescence intensity generated by the chemical nose after the addition of gut-derived bacteria with different OD600 values.
		pH 7.0						pH 5.0
	Analytes	-None	-Dap	-Gly3	-Leu	-Phe	-Pht	-None	-Dap	-Gly3	-Leu	-Phe	-Pht
	Species	Ch1	Ch1	Ch1	Ch1	Ch1	Ch1	Ch1	Ch1	Ch1	Ch1	Ch1	Ch1
	F.C._0.0003	120	334.2	381	283	1674.8	316	98	246	281.2	232.4	271.4	1944
	F.C._0.0003	116	345.4	377.8	273	1727.2	293	103	242.8	279.2	213	271	1829.8
	F.C._0.0003	113.4	340.6	373.2	277.6	1732	315.6	95.4	243.8	290	228	275.6	2048.4
	F.C._0.0003	121.6	325.2	359.6	261.2	1618.8	299.2	98.4	244.6	287	203.2	264	1694.6
	F.C._0.0003	107.6	334	351.8	249.2	1590	299	92.6	241.8	265.6	208.2	265	1842.6
	F.C._0.0003	135.4	320.2	352.8	248.4	1544	304.4	108.4	232	263.6	197.6	256	1797.8
	F.C._0.0010	152.6	369.6	421	337.6	1731.2	320.4	122.4	250.2	310.8	233.2	309.2	2137.4
	F.C._0.0010	158.6	397.2	415	317	1631.2	315.6	117.6	256.8	304.4	240.6	310.6	1937.6
	F.C._0.0010	159.6	384.6	408.4	318.8	1645	308.2	116.6	250.4	308.4	253.6	310.8	1856.4
	F.C._0.0010	162	373.8	406.2	314.2	1658	328.4	113.2	258.8	295.2	240.6	317.2	1880.6
	F.C._0.0010	155	385.6	393.4	320.2	1599.4	306.8	108.4	258.2	282.8	224.6	289.4	1899.6
	F.C._0.0010	150.4	359.2	384	297	1635.6	322.6	117.4	244.4	296.8	222.4	302.8	1805
	F.C._0.0030	263.6	430.2	481.2	407.6	1811	350.6	168.2	315	361.4	299.6	381.8	2182
	F.C._0.0030	256.6	425.6	467.6	390	1667.4	353.6	166.8	292.8	349.4	281.4	370.4	2017.4
	F.C._0.0030	258.6	435.8	453.8	405.8	1744.4	342	166.8	318.4	336.6	288.8	377	1940
	F.C._0.0030	277.4	427.6	454.4	390	1731.6	371.8	165	298.4	325	279.4	376.6	2141.6
	F.C._0.0030	252.6	416	444.4	387.8	1641.2	346	158	278.2	317.2	269.2	355	1800.8
	F.C._0.0030	245.2	403.8	430.2	380.6	1659.2	347	157.6	281	319	271	352.2	1868.6
	F.C._0.0100	633.6	697.4	742	789.4	1947.4	490	376.6	446.2	444.6	464.4	599.6	2162
	F.C._0.0100	664.2	674	728	742.2	1864.8	464.2	376.2	452.4	451.8	432.4	565.6	2125.6
	F.C._0.0100	685	721.8	711.6	776	1848.2	490.2	400.6	461.6	466.4	447.6	598.2	2073.2
	F.C._0.0100	669.2	612.4	702	712.4	1851.2	480.4	359.6	432.8	432.6	431.4	568	2132
	F.C._0.0100	632	604.6	667.2	678	1823.4	456.4	344.6	439.8	417.2	412	552.2	2039.2
	F.C._0.0100	660	614.4	687.6	668	1756.4	497.8	373.2	438.6	441.2	435.2	569.8	1943.2
	B.B.4_0.0003	106.4	375.2	421	298.4	1846	339.4	86.8	235.8	315.4	227.2	287.4	2232
	B.B.4_0.0003	109	356	408.4	276.8	1821.4	325.6	92	240.4	329.4	225.8	285.2	1964
	B.B.4_0.0003	111	373.8	389.6	285	1899.6	328	92.6	241.4	305.2	222.4	300.8	2213.6
	B.B.4_0.0003	116.6	350.6	372.6	266.8	1701	301.2	98.6	240.4	278.4	216.8	281.2	1913.4
	B.B.4_0.0003	107.8	363.8	370	268	1693.4	323	90	230.2	273.4	220.6	279.2	2085.4
	B.B.4_0.0003	128.4	360.4	383.6	262.4	1650.8	321.4	111	239.8	278.6	218	262.4	1963.2
	B.B.4_0.0010	134.4	394.6	414.8	297.6	1966.6	340.8	115.2	258.4	323.8	252.6	315	2260.4
	B.B.4_0.0010	129.8	389	390.6	288.4	1695.6	335.4	108.4	264	319.2	248.4	312.4	2185.2
	B.B.4_0.0010	142.8	392.4	396	301.2	1821	322	104.6	263	308.8	243.8	412.4	1934.4
	B.B.4_0.0010	136.8	363.4	396.6	292	1727.2	331.2	111	251.8	307	238	306.2	2001.4
	B.B.4_0.0010	133.4	362	374	285.8	1665.2	324.6	100.8	245.6	297	229.6	294.8	1967.6
	B.B.4_0.0010	139.6	379.6	383.4	273.4	1692.8	325.4	106	251.8	290.8	232.6	298	1857.8
	B.B.4_0.0030	215.2	417.8	457.2	384.6	1895.4	391.6	156	282.4	361.4	285.4	367.6	2308
	B.B.4_0.0030	200	419.8	458.2	352.6	1863	385	150	289.4	376.6	265.8	354.4	2092
	B.B.4_0.0030	192	426	440.4	366.8	1916.4	368	156.8	278.2	350.4	273.4	385.6	2009.6
	B.B.4_0.0030	196.8	399.8	470.8	351	1756.6	381.6	155.8	289.2	341.2	269.4	336	2174.4
	B.B.4_0.0030	182	396.4	449.2	347.2	1778.6	362.6	141.8	283.4	343.8	251.2	338.4	2012.8
	B.B.4_0.0030	196	403.8	437.6	327.4	1889	371	137.2	278.8	353.6	256.6	322.4	1911.4
	B.B.4_0.0100	465	640.6	711.2	616.2	2083.4	556.2	313	413.6	501.6	420.4	584.6	2382
	B.B.4_0.0100	464.6	636.8	719.2	606.6	2033.6	580	298.6	420.4	516.6	417.8	562.8	2278.8
	B.B.4_0.0100	456.4	650.2	711.8	620	2037.8	557.2	302	408.8	494.8	411.6	569.8	2299.2
	B.B.4_0.0100	458.8	584	698.4	573.6	2024.4	567.8	280.4	382.2	468.4	406	540.6	2404.8
	B.B.4_0.0100	422.6	585.8	672.8	593	2001.2	550.2	278.2	388.2	467.6	391.6	515.2	2391.4
	B.B.4_0.0100	460.8	580	665.2	570.8	1987.6	554.4	286.6	393.4	471.8	399.4	536.6	2135.2
	0.000	108.2	401.2	435.8	308.6	1990.8	325.6	86.2	254	317	245.8	293.8	2089.8
	0.000	108.8	375.8	413.2	289.8	1894.2	317.8	93	256.6	304.8	238.4	288	2163
	0.000	109	433.6	430.2	300.8	1923.2	321.4	87.8	260.8	325.4	243.6	289.8	2089.6
	0.000	110.4	381.8	396	272.4	1970.6	352.4	91.2	258.2	301.6	218.8	295.6	2383.2
	0.000	105.6	321.4	392.8	248.2	1877.2	300.4	86.8	253.8	298.8	229	270.2	1814.6
	0.000	108.2	386	386.8	280.4	1892.6	324	94	255.8	289.8	229	301.6	2042

## Sheet: Dataset 9
	Dataset 9. Data-set matrix of the fluorescence intensity after the addition of model microbiome samples spiked with trace amounts of gut-derived bacteria generated from the chemical nose.
		pH 7.0						pH 5.0
	Analytes	-None	-Dap	-Gly3	-Leu	-Phe	-Pht	-None	-Dap	-Gly3	-Leu	-Phe	-Pht
		Ch1	Ch1	Ch1	Ch1	Ch1	Ch1	Ch1	Ch1	Ch1	Ch1	Ch1	Ch1
	0.000	316	928.4	2055.6	270.4	743.8	1239.8	394.6	1265.6	318.2	349	1156.4	1891.4
	0.000	365.6	992	2380	303.6	761.8	1403	447.6	1392.6	341.2	386.6	1324.8	2317.6
	0.000	304.8	892	2531.4	312.8	738.4	1320.4	552.8	1417.8	326.6	389.8	1187.4	1925.6
	0.000	333.6	950.6	2533.4	328.2	822.6	1437.8	601	1449.8	358.6	429.2	1312.6	2423
	0.000	295.4	880.2	2413.2	330.8	713.6	1220	519.4	1351	323.2	401.2	1201.8	2173.4
	0.000	309.8	913.2	2372.2	334.4	791.6	1344.4	579.6	1056.6	345.6	425.4	1297.8	2408.8
	0.000	329.2	873.4	2321	273.4	707.4	1287	402.4	1403.2	315.4	366	1111.2	2111.6
	0.000	335.6	911.6	2238.2	316	778	1402.2	441.6	1404.6	334	372.4	1276.8	2398
	0.000	345.4	944.8	2600.8	334.6	764.4	1400.6	574	1413.6	371.4	392	1271.2	2385.8
	0.000	350	966	2617.2	351	842.8	1548.2	631.8	1481.2	364.8	456.2	1401.8	2481.4
	F.C._0.001	325.6	869.4	2201.8	306.6	773	1156.2	436.4	1217.2	372.4	382.2	1299.6	2101.2
	F.C._0.001	405.8	1037	2535	363	855	1531.8	468.2	1553.2	376.8	429.6	1457	2485.2
	F.C._0.001	385.8	1030.8	2752.4	434.2	910.4	1454.8	622.8	1516	380.6	482.8	1416	2406.8
	F.C._0.001	401.2	1032.6	2814.8	383	878.2	1519.6	613.4	1669	376.8	468.2	1413.2	2413.8
	F.C._0.001	366.8	976.2	2563.2	380.4	894.6	1281.2	579.4	920	363.2	467.8	1355.8	2348.4
	F.C._0.001	293.2	825	2510.2	363.6	839.6	1348.2	607.6	1483.6	390.2	476.2	1271.2	2363.6
	F.C._0.001	414.4	999.2	2585.2	360	859.8	1369.4	453.2	1557.6	363.2	431	1407.8	2364.2
	F.C._0.001	407.2	1038.6	2616.4	349.6	840.8	1445.6	459.2	1503.4	361.8	427.6	1379.6	2489.6
	F.C._0.001	416.2	1024	2689	400.4	922	1526.8	612.8	1557.6	383.2	488.8	1437.4	2408.6
	F.C._0.001	421.4	1078.6	2919.8	395.2	883.8	1579.4	651.8	1670.4	437.8	493.6	1476.6	2623.6
	F.C._0.002	462.2	1094.4	2739.8	402.4	944.2	1675.4	490	1679.4	392.2	463.6	1536.2	2634.2
	F.C._0.002	505.4	1158.8	2339.2	423	993.4	1716.4	516.8	1635	410.8	483.6	1567.8	2497
	F.C._0.002	467.6	1088.2	2734.4	423.6	974.6	1556.2	652	1789.4	404.4	518	1522.6	2628
	F.C._0.002	480.6	1126.4	3095.2	451.4	980	1616.8	688.2	1815.4	430	545.2	1572.4	2645
	F.C._0.002	408.6	835.6	2660.6	411.2	944.8	1521.4	630.4	1214.6	392.8	519.8	1493.4	2673.4
	F.C._0.002	386.2	1101	833.2	446.2	962.4	1548	676.2	1609	397.2	537.2	1505.6	2577.4
	F.C._0.002	467.8	1094.2	2746.2	397.8	938.2	1643	505	1713.4	380.4	498.8	1506.4	2763.6
	F.C._0.002	508.4	1121.6	2608.8	433.4	939.8	1647.2	511.4	1721.2	411	514	1528.4	2722.6
	F.C._0.002	484.8	1105	2834.2	436.8	955.8	1657.6	667.2	1773.6	423.2	522.4	1595.8	2919
	F.C._0.002	452.6	1188.6	2323.4	452.2	1024.6	1774.2	664.6	1805	442.6	562.4	1682.4	2742
	F.C._0.003	517.4	1176.4	2689.8	402.8	910.8	1571	523.4	1634.8	410.6	467.6	1456.6	2487
	F.C._0.003	540.6	1111	2846	407.2	910	1593	501.8	1586.4	425.8	466.2	1520.8	2551.8
	F.C._0.003	557	1209	3045	451.4	949.6	1615	733.6	1766.2	425.4	548.2	1545	2454.6
	F.C._0.003	533.4	1133.2	3011.2	477.2	1003.4	1662	703.4	1775.2	439.6	550.8	1543.2	2621.4
	F.C._0.003	508.6	1162.2	2119.4	448.8	939.8	1525.8	689.8	1673.4	418.2	539.2	1511.6	2722.2
	F.C._0.003	346	1118.6	2635.2	474.4	973.2	1545.6	691	1682.8	438.4	542.4	1457.2	2802.6
	F.C._0.003	548.2	960.6	2799.2	414	924.4	1633.8	530.6	1608.6	401.6	490.4	1442	2401.8
	F.C._0.003	567.8	1127.4	2699	425.8	932.2	1531	471.2	1469.8	406.2	482.6	1399	2552
	F.C._0.003	577.8	1215.2	2994.2	460.4	966.2	1671.8	751.6	1893.6	436.2	566.8	1587.4	2811.2
	F.C._0.003	547	1173.4	2935.6	466.4	1058.2	1682.2	732.6	1723.2	440.8	540.6	1559	2788.8
	B.B.4_0.001	550.4	1144.8	2528.6	437.6	889.6	1413.6	308.2	1564.8	444.4	456.8	1345	2292.4
	B.B.4_0.001	562.6	1142.6	2634.6	464.6	947.8	1585.4	527.4	1611.4	474.4	501	1421.8	2553.4
	B.B.4_0.001	557.8	1165.8	2698.2	486.6	935.8	1481.2	714.8	1623.2	465.4	539.4	1423.4	2318.8
	B.B.4_0.001	552.8	1185.6	2903.6	521.6	997.4	1555.6	700.8	1695.4	500.2	583.4	1483.6	2780.2
	B.B.4_0.001	572.4	1150.4	2564.4	494.4	908.6	1437	732	1667.4	456	540.8	1393.8	2548.4
	B.B.4_0.001	541	1130	2807.2	511.4	967	1447.6	697	1614	476.4	556.4	1400.2	2555.2
	B.B.4_0.001	524.4	1071.2	2407.4	438.4	863.4	1364.8	537.8	1517.4	445	456	1199	2475
	B.B.4_0.001	544.2	1133.2	2487.8	474.6	927.4	1524.6	522.4	1557.4	492.4	496.2	1429.6	2633.2
	B.B.4_0.001	559	1199.8	2809.4	532	993.6	1513.8	725.4	1586.8	488.2	544.8	1453.2	2783.6
	B.B.4_0.001	574	1156.8	2933	565.2	1049.4	1658	732	1723.2	529.2	602.6	1576.4	2777.8
	B.B.4_0.002	774.4	1343.4	2771.6	634.4	998.8	1818.8	576.2	1703.8	630.2	574.6	1592.4	2495.2
	B.B.4_0.002	834.2	1370.2	2653.4	636.2	1090	1703.4	666	1752.2	641	591	1609	2821
	B.B.4_0.002	776.2	1301.8	2749.6	678.4	1058.2	1566.8	797.2	1753.6	660.4	704	1577.6	2719.6
	B.B.4_0.002	756.6	1409.2	2804.4	661	1071	1666.4	837.8	1828	646.4	653.6	1537.6	2781.6
	B.B.4_0.002	780	1303.6	2693.4	677.2	989.8	1474.2	809.4	1779.2	621.8	657	1424	2551
	B.B.4_0.002	808.2	1382.6	2705.8	674.4	1053.8	1585.8	817.4	1686	619	657.2	1575.4	2622
	B.B.4_0.002	779.6	1297.8	2669	630.4	1036.2	1528.6	612	1653.8	633.6	574.6	1533.8	2685.6
	B.B.4_0.002	807.6	1384.6	2576.4	653.2	1108.4	1580.2	603.2	1735	630	598.2	1543.6	2784.6
	B.B.4_0.002	803.8	1349.6	2797.2	700.2	1099.6	1574.8	824	1851	657	648.4	1587.4	2683
	B.B.4_0.002	805.4	1434.6	2791.6	741.6	1143.4	1710	894	1879.6	652.4	681.2	1694	2909
	B.B.4_0.003	1021.4	1573.4	2871.4	870.4	1304.6	1833.2	728.2	1872.2	827.4	745	1836.8	2999.8
	B.B.4_0.003	1054.8	1597	2745.4	890	1241.8	1709.6	738	1959.2	819.8	720.6	1775.2	2852.8
	B.B.4_0.003	1032.8	1609.6	2922	910.2	1327.8	1913	933.2	2012	831.8	811	1824.8	2972
	B.B.4_0.003	1099.6	1672	3001.4	920.2	1323.4	1837.8	1015.8	2058.4	859.6	849.4	1725	3077.4
	B.B.4_0.003	993	1592	2755.8	865.4	1262	1790.2	959.6	2000.6	784.4	807.6	1775.4	3079
	B.B.4_0.003	1052.8	1620.6	2929.4	898.2	1272.6	1795.2	999	2030.2	801	856.6	1768.4	2915.4
	B.B.4_0.003	1026	1612	2740.8	869	1285.8	1795.6	734.2	2016.2	804.6	724.8	1671.4	3034
	B.B.4_0.003	1050.2	1565	2704.6	874.8	1276.6	1760	763.8	1878.6	809	727.6	1691.2	3107.4
	B.B.4_0.003	1134	1697.8	3169	973	1388.8	2005	994	1999	860.2	862.6	1884	3267
	B.B.4_0.003	1072.4	1651.2	3102.4	913.8	1384.6	1956.4	1013	2093.4	842.6	618.6	1853.6	3101.6
